# Supplementary material for: Harnessing visible-light energy for unbiased organic photoelectrocatalysis: synthesis of N-bearing fused rings
Source: Royal Society of Chemistry journal article supplement (doi:10.1039/d1gc03587h), 2021-12-13
Supplement: d1gc03587h1.pdf [file d1gc03587h1.pdf]

Supporting information for

## **Harnessing Visible-light Energy for Unbiased Organic Photoelectrocatalysis: Synthesis of N-Bearing Fused Rings**

Ming Gong,<sup>‡a</sup> Mengmeng Huang,<sup>‡a</sup> Yabo Li,<sup>a</sup> Jianye Zhang,<sup>a</sup> Jung Keun Kim,<sup>\*a</sup> Jong Seung Kim,<sup>\*b</sup> and Yangjie Wu<sup>\*a</sup>

<sup>a</sup>College of Chemistry, Henan Key Laboratory of Chemical Biology and Organic Chemistry, Key Laboratory of Applied Chemistry of Henan Universities, Zhengzhou University, Zhengzhou 450052, China.

<sup>b</sup>Department of Chemistry, Korea University, Seoul 02841, Korea.

\*Corresponding authors: E-mail: kim@zzu.edu.cn, jongskim@korea.ac.kr, wyj@zzu.edu.cn

<sup>‡</sup>These authors contributed equally.

## Table of Contents

|                                                                                                        |             |
|--------------------------------------------------------------------------------------------------------|-------------|
| <b>Supplemental Experimental Procedures</b> .....                                                      | <b>S3</b>   |
| 1. General Information .....                                                                           | S3          |
| 2. Experimental Procedures .....                                                                       | S3          |
| 3. LSV Curves, Photocurrent Density Response and EIS Experiments .....                                 | S5          |
| 4. XRD, UV/VIS Absorption Spectra, Cyclic Voltammetry Experiments .....                                | S8          |
| 5. Control Experiments .....                                                                           | S14         |
| 6. Computational Details .....                                                                         | S20         |
| 7. Characterization Data .....                                                                         | S40         |
| <b>Supplemental Data</b> .....                                                                         | <b>S53</b>  |
| 1. NMR Spectra: <sup>1</sup> H, <sup>13</sup> C and <sup>19</sup> F NMR Spectra .....                  | S53         |
| 2. Crystallographic Analysis: Determination of Structure of <b>4a</b> , <b>4j1</b> and <b>4s</b> ..... | S96         |
| <b>Supplementary References</b> .....                                                                  | <b>S101</b> |

## Supplemental Experimental Procedures

### 1. General Information

All reactions were performed using quartz tube. The divided cell used for mechanism study (Fig. 4A, exp.3) is "H-type" cell with a porous glass to separate photoanode and cathode. Commercial grade reagents **2** and EtOH (OCEANPAK, GC  $\geq$  99.9%) were used without further purification except as indicated below. *N*-aryltetrahydroisoquinolines (**1**) were prepared according to reported procedures.<sup>1</sup> Analytical thin-layer chromatography (TLC) was performed on Merck silica gel aluminum plates with F-254 indicator, visualized by irradiation with UV light. Flash chromatography columns were packed with 200-300 mesh silica gel and silica gel was purchased from Qing Dao Hai Yang Chemical Industry. <sup>1</sup>H NMR and <sup>13</sup>C NMR spectra were recorded on a Bruker DPX-400 spectrometer in CDCl<sub>3</sub>. All chemical shifts ( $\delta$ ) are reported in ppm and coupling constants (*J*) in Hz relative to tetramethylsilane as internal standard ( $\delta = 0$  ppm). For the <sup>19</sup>F spectra,  $\alpha$ -trifluorotoluene served as external standard ( $\delta = -63.9$  ppm). High resolution mass spectra (HRMS) were obtained on an Agilent LC-MSD-Trap-XCT spectrometer with micromass MS software using electrospray ionization (ESI). The UV-Vis absorption spectra were recorded in MeCN on a Perkin Elmer Lambda 35 spectrometer. X-Ray powder diffraction (XRD) patterns were recorded using an X-ray Diffractometer (X' Pert PRO) at a scan rate of 5 ° min<sup>-1</sup> by using Cu<sub>K $\alpha$</sub>  radiation. The LCD Digital Hotplate Magnetic Stirrer MS-H-Pro<sup>+</sup> and Digital Single Channel Adjustable Automatic Electronic Pipette Micropipette dPetee<sup>+</sup> were purchased from Dragon Laboratory Instruments Limited. The linear sweep voltammetry (LSV), cyclic voltammetry (CV) curves and electrochemical impedance spectroscopy (EIS) measurements were performed using a CHI660E Instruments. All reactions were carried out with photoreactor (Serial No: D243V12) which was purchased from LUOYANG JINFENG ELECTROMECHANICAL EQUIPMENT CO., LTD.

### 2. Experimental Procedures

#### 1) Preparation of the BiVO<sub>4</sub>

Firstly, Contaminants of the fluorine-doped SnO<sub>2</sub> (FTO) conducting glass (10 mm  $\times$  23 mm  $\times$  1.1 mm,  $\leq$  7 ohm/sq, Xiang Science & Technology) were removed by washing with deionized water, acetone and ethanol three times (15 minutes each wash). After drying with Ar, the BiVO<sub>4</sub> electrode was prepared by electro-deposition as following steps:<sup>2</sup> (1) Bi(NO<sub>3</sub>)<sub>3</sub>·5H<sub>2</sub>O (0.04 M) and KI (0.4 M) were dissolved in 50 mL distilled water to form a clear solution; (2) HNO<sub>3</sub> was used to adjust the pH to 1.7; (3) *p*-benzoquinone ethanol solution (0.23 M, 20 mL) was added to above mixed solution and stirred vigorously for 20 min; (4) The electrodeposition was carried out in three-electrode cell using a constant potential of -0.1 V versus Ag/AgCl for 600 seconds at room temperature (FTO as a working electrode, Pt plate as a counter electrode and Ag/AgCl as a reference electrode); (5) After being taken out and washed with distilled water, the dried BiOI film was covered by dipping 200  $\mu$ L containing vanadyl acetylacetonate (0.2 M) DMSO solution. BiVO<sub>4</sub> film was formed by heating in a muffle furnace at 450 °C for 1 hour; (6) After being cooled down to room temperature, the electrode was soaked in NaOH solution (1.0 M) for 30 min to remove excess V<sub>2</sub>O<sub>5</sub>. Finally, the BiVO<sub>4</sub> electrode was rinsed with distilled water.

## 2) General procedure for photoelectrocatalytic transformation of malononitrile (2) and *N*-aryl-tetrahydroisoquinolines (1)

*N*-aryl-tetrahydroisoquinoline (1) (0.2 mmol), malononitrile (2) (1.5 equiv.), ammonium chloride (0.1 M) and EtOH (5 mL) were added to a quartz-tube with BiVO<sub>4</sub>/FTO as photoanode and Pt plate as counter electrode at room temperature under 3 W blue LED irradiation. Electrodes were rinsed with DCM (3 mL). The mixture was extracted with dichloromethane (2 × 5 mL) and saturated salt water (2 × 5 mL) and dried over Na<sub>2</sub>SO<sub>4</sub>. The solvent was removed in vacuum, and the crude reaction mixture was purified by chromatography on silica gel (elute: ethyl acetate/petroleum ether = 1/30-1/10, v/v) to give the desired product 3 and 4.

## 3) Reuse of photoanode

The reaction procedure is as mentioned above for the photoelectrocatalysis. After the completion of the reaction, the BiVO<sub>4</sub>/FTO photoanode was separated from the reaction mixture, and was applied to the next run after cleaning with CH<sub>2</sub>Cl<sub>2</sub> (3 × 0.5 mL). The reaction mixture was extracted with dichloromethane and saturated salt water, the organic phase was dried over Na<sub>2</sub>SO<sub>4</sub> and concentrated under reduced pressure. Finally, they were purified by chromatography on silica gel (elute: ethyl acetate/petroleum ether = 1/30-1/10, v/v) to give the desired product 3 and 4.

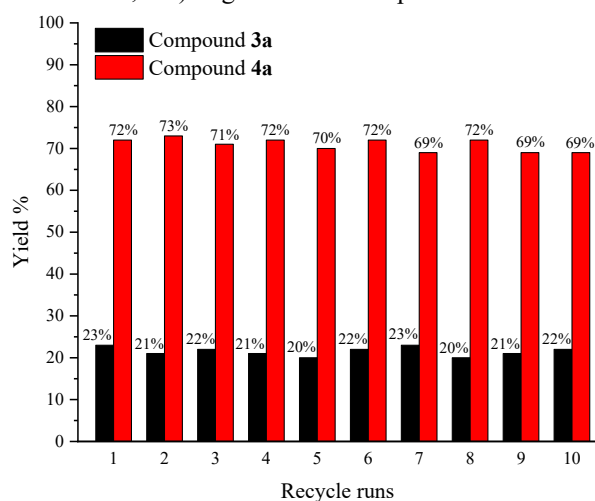

**Figure S1.** <sup>a</sup>Reaction condition: 2-phenyl-1,2,3,4-tetrahydroisoquinoline (1a, 0.2 mmol), malononitrile (2a, 1.5 equiv.), ammonium chloride (0.1 M), EtOH (5 mL) in a quartz-tube under air at room temperature, 3 W blue LED, for 5 h. Isolated yield.

### 3. LSV Curves, Photocurrent Density Response and EIS Experiments

#### 1) The linear sweep voltammetry (LSV) curves of BiVO<sub>4</sub> photoanode

LSV curves were recorded with a three-electrode configuration using a CHI660E electrochemical workstation. BiVO<sub>4</sub>/FTO electrode was used as the working electrode with the Ag/AgCl reference electrode and Pt counter electrode. LSV curves were performed at a scan rate of 0.1 V/s without stirring.

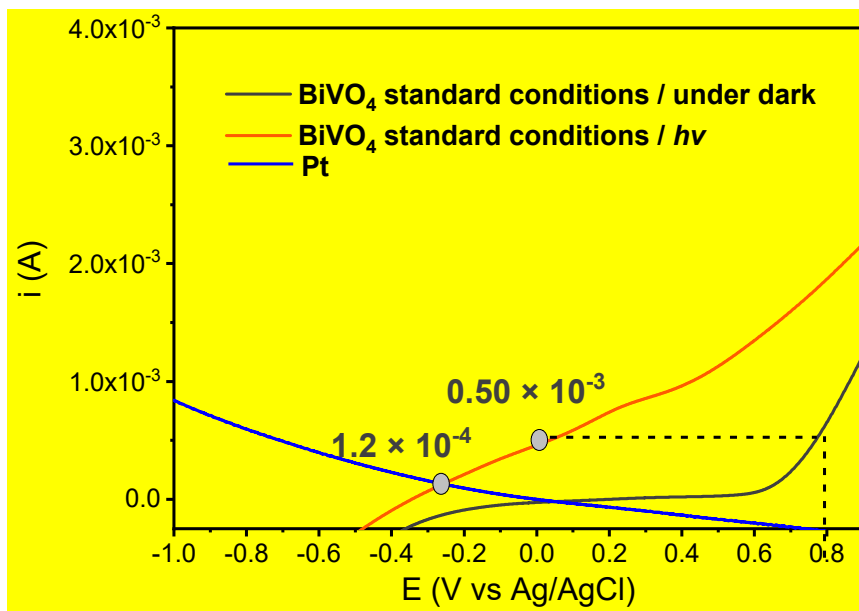

**Figure S2.** LSVs of a BiVO<sub>4</sub> photoanode obtained under blue LED ( $E = 5.00-5.15 \times 10^4$  lx,  $\lambda_{\max} = 450-465$  nm) illumination (red) and under dark (black) in EtOH (5 mL) that contained NH<sub>4</sub>Cl (0.1 M), **1a** (0.2 mmol) and **2a** (0.3 mmol)

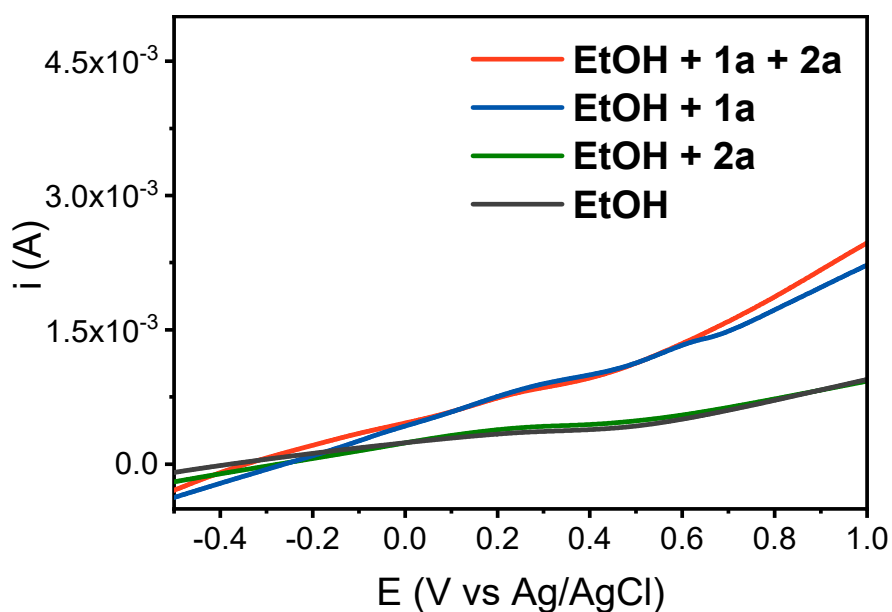

**Figure S3.** LSVs of PEC oxidation under LED illumination. The electrolyte is 0.1 M NH<sub>4</sub>Cl

#### 2) Photocurrent density response test

The measurement was performed by a two-electrode configuration (BiVO<sub>4</sub>/FTO electrode as the working electrode and Pt as the counter electrode.).

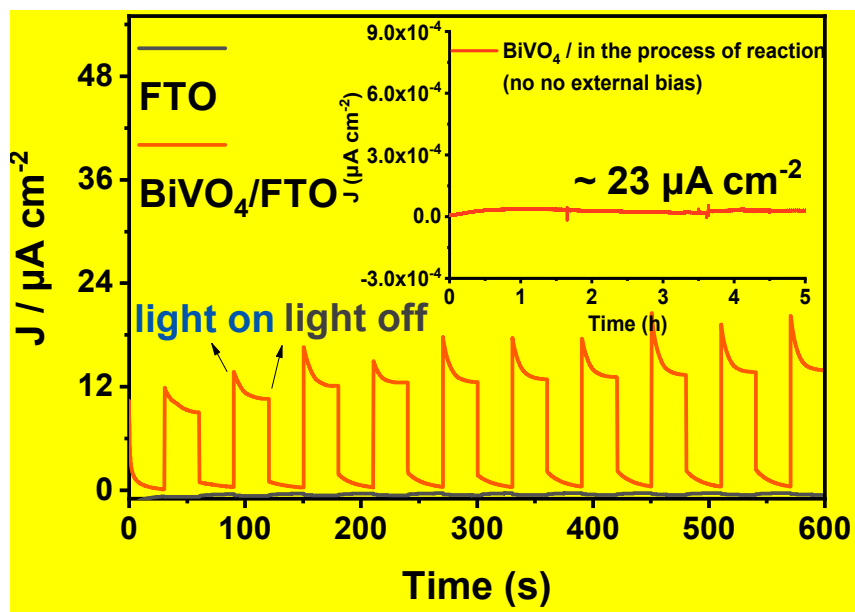

**Figure S4.** Photocurrent density response for BiVO<sub>4</sub>/FTO,  $E_{\text{appl}} = 0$  V. (Net photocurrent during the 5 hours of operation using BiVO<sub>4</sub> photoanode with Pt in reaction mixture (5 mL EtOH, **1a**, **2a** and NH<sub>4</sub>Cl (0.1 M)) in a two-electrode configuration (no external bias))

### 3) Electrochemical impedance spectroscopy (EIS) investigation

EIS measurements were performed by a three-electrode configuration in EtOH using a CHI660E electrochemical workstation with 5 mV amplitude and frequencies that ranged from 100 kHz to 1 Hz. BiVO<sub>4</sub>/FTO electrode was used as the working electrode with the Ag/AgCl reference electrode and Pt counter electrode. For developing Mott-Schottky plot, the values of capacitance were taken at voltage range between -0.5 V and 0.5 V versus Ag/AgCl.

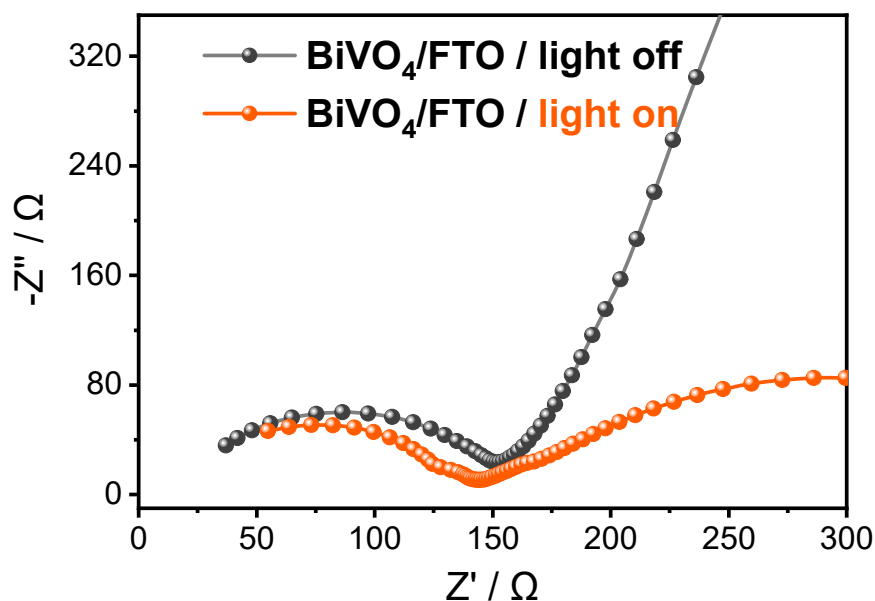

**Figure S5.** Nyquist plots for BiVO<sub>4</sub> photoanode measured in 0.1 M NH<sub>4</sub>Cl solution in the dark (black circles) and blue LED ( $\lambda = 450\text{-}460$  nm) illumination (red circles)

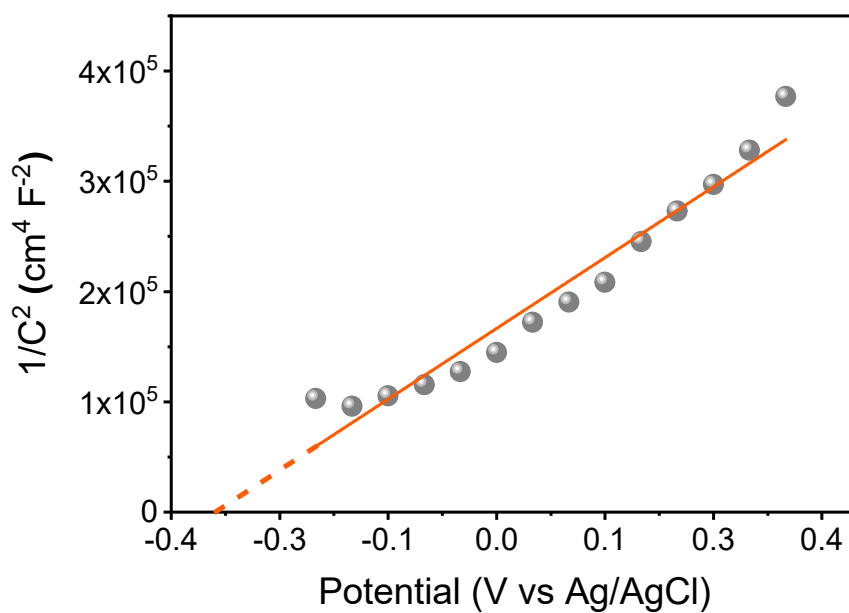

**Figure S6.** Mott-Schottky plot measured in EtOH

$$V_{fb} = -0.39 \text{ V vs Ag/AgCl};$$

$$E_{\text{Ag/AgCl}}(\text{reference}) = 0.1976 \text{ V vs NHE at } 25 \text{ }^\circ\text{C}$$

$$V_{fb} = -0.19 \text{ V vs NHE.}$$

#### 4. XRD, UV/VIS Absorption Spectra, Cyclic Voltammetry Experiments

##### 1) The X-ray diffraction (XRD) analysis

The spectra were recorded using a X-ray Diffractometer (X' Pert PRO) at a scan rate of  $5^\circ \text{ min}^{-1}$  by using  $\text{Cu}_{K\alpha}$  radiation. The XRD pattern showed strong XRD peaks for  $\text{BiVO}_4$ , which suggests that  $\text{BiVO}_4$  is monoclinic phase.

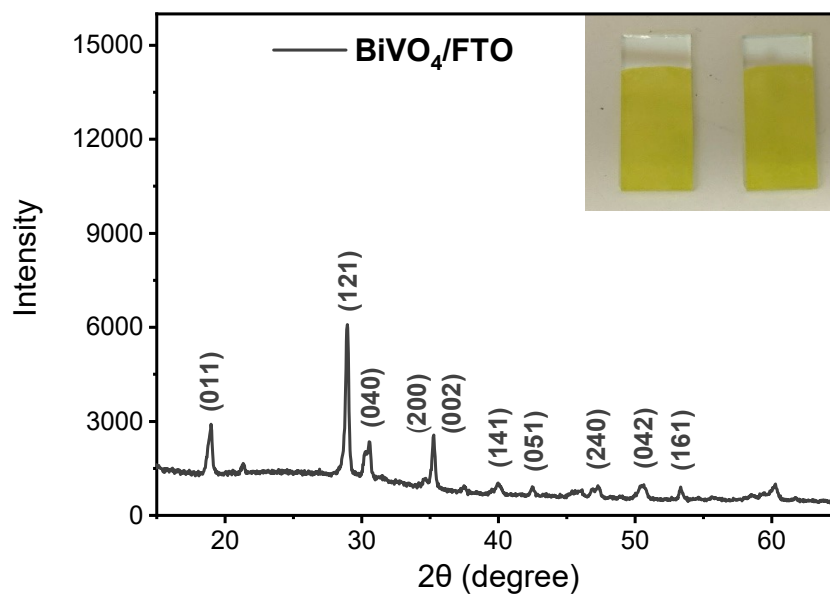

Figure S7. XRD patterns of  $\text{BiVO}_4/\text{FTO}$  sample.

##### 2) UV/VIS Absorption spectra

The UV/VIS Absorption spectra were recorded in  $\text{CH}_3\text{CN}$  of a 0.1 mM solution in 10 mm path length quartz cuvette on a Perkin Elmer Lambda 35 Spectrometer.

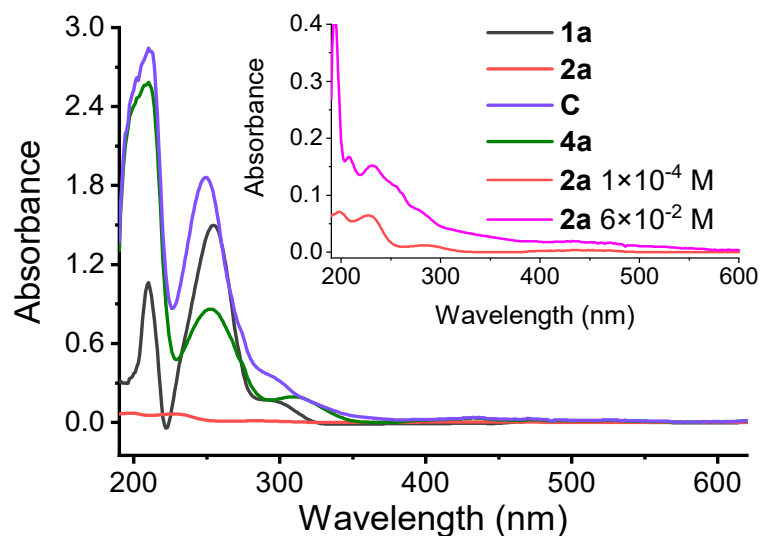

Figure S8. Absorption spectra of *N*-phenyltetrahydroisoquinoline (**1a**), malononitrile (**2a**), 5,12a-dihydroindolo[2,1-*a*]isoquinoline-12,12(6*H*)-dicarbonitrile (**4a**) and 2-(2-phenyl-1,2,3,4-tetrahydroisoquinolin-1-yl)malononitrile (**C**) in  $\text{CH}_3\text{CN}$  (0.1 mM).



## 2) Cyclic Voltammetry Experiments

Cyclic voltammetry was measured in a glass cell with a CHI660E electrochemical workstation under Ar balloon protection with conventional three-electrode system. The working electrode was a steady glassy carbon disk electrode, and the counter electrode was a platinum wire. The reference was an Ag/AgCl electrode submerged in saturated aqueous KCl solution. 5 mL of CH<sub>3</sub>CN containing 0.1 M *n*-Bu<sub>4</sub>NPF<sub>6</sub> were poured into the electrochemical cell. The CV of substrates were measured at the concentration of 5 mM. The scan rate was 0.1 V/s, ranging from 0 V to 2 V.

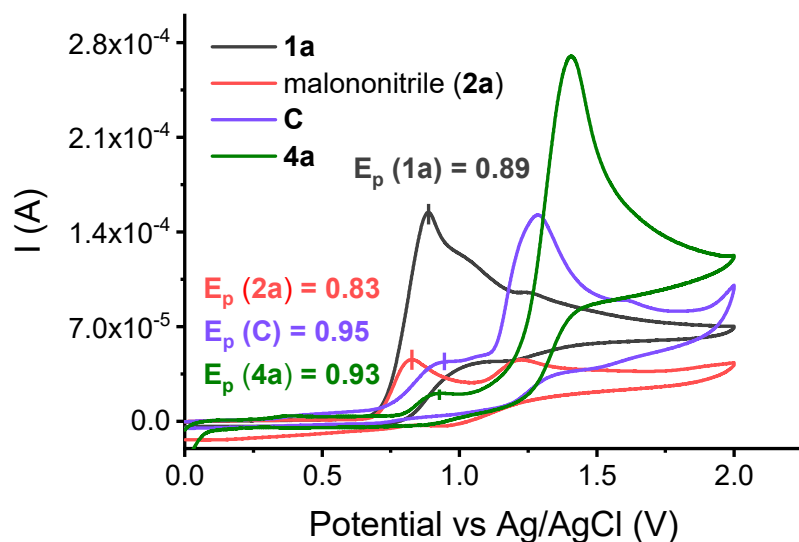

**Figure S9.** Cyclic voltammograms of compound **1a**, **2a**, **C** and **4a**

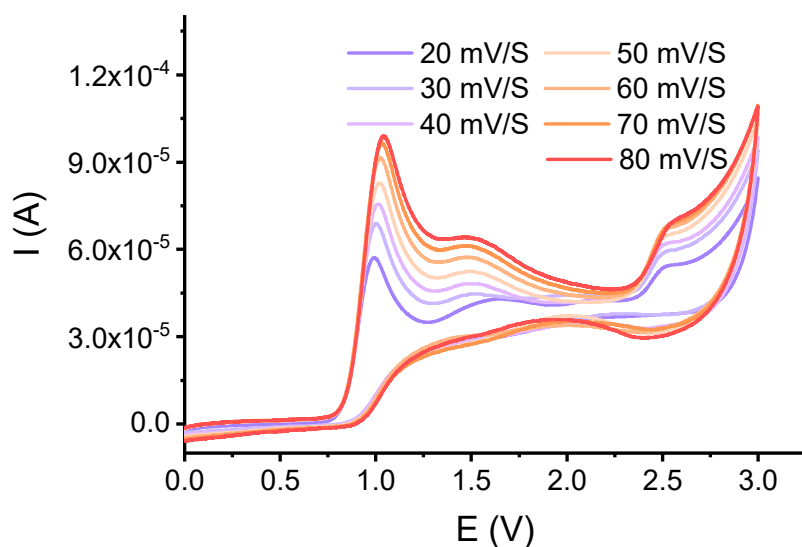

**Figure S10.** Cyclic voltammetry of compound **1a** (5 mM) in CH<sub>3</sub>CN at different scan rates. Curves are obtained at 20, 30, 40, 50, 60, 70 and 80 mV/s, respectively

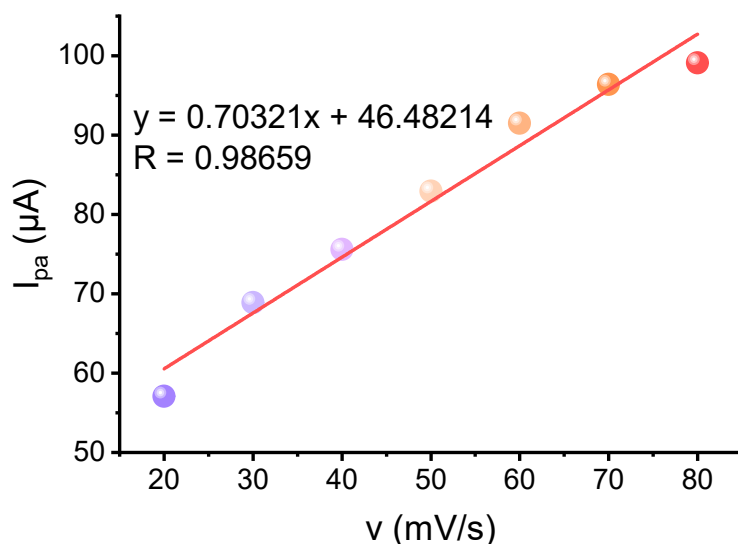

**Figure S11.** The plot of peak current versus scan rate of **1a**

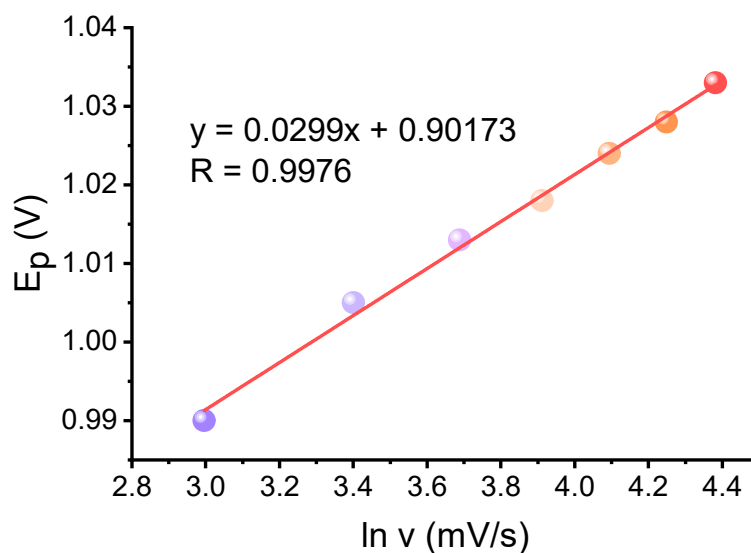

**Figure S12.** The relationship between  $E_{pa}$  of **1a** and  $\ln v$ .

The peak current increased linearly with the scan rate in the range of 20-80 mV/s and the equation could be expressed as follows:  $y = 0.70321 x + 46.48214$ ,  $R = 0.98659$ . It could be seen that the oxidation of compound **1a** was an adsorption-controlled process. For an adsorption-controlled and irreversible electrode process, according to Laviron method,  $E_{pa}$  is defined by the following equation:

$$E_{pa} = E^0 + (RT/\alpha nF) \ln (RTk^0/\alpha nF) + (RT/\alpha nF) \ln v$$

where  $\alpha$  is transfer coefficient,  $k^0$  is standard rate constant of the reaction,  $n$  is electron transfer number involved in the rate-determining step,  $v$  is scan rate, and  $E^0$  is formal potential. Other symbols have their usual meanings. Thus, the value of  $\alpha n$  can be easily calculated from the slope of  $E_{pa}$ - $\ln v$ . In this system, the slope is 0.0299. Generally, transfer coefficient  $\alpha$  was assumed as 0.5, so the value of the number of electron ( $n$ ) was calculated to be 2.

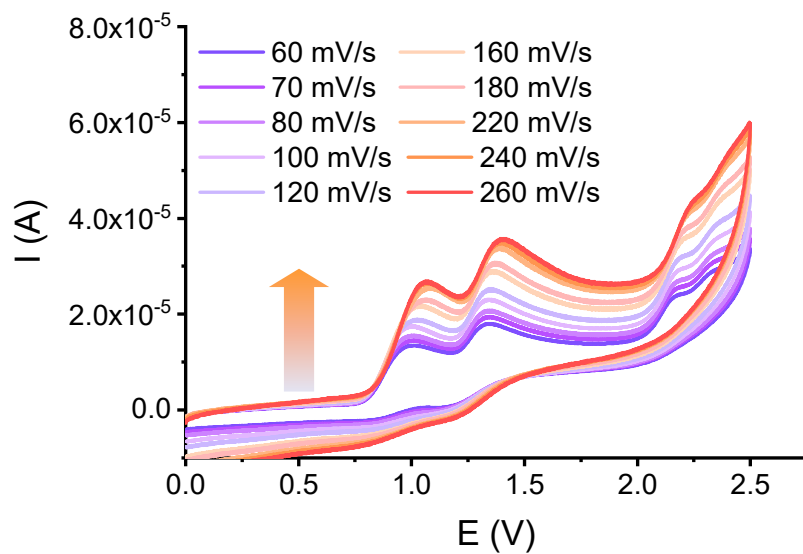

**Figure S13.** Cyclic voltammetry of compound **2a** (5 mM) in CH<sub>3</sub>CN at different scan rates. Curves are obtained at 60, 70, 80, 100, 120, 160, 180, 220, 240 and 260 mV/s, respectively

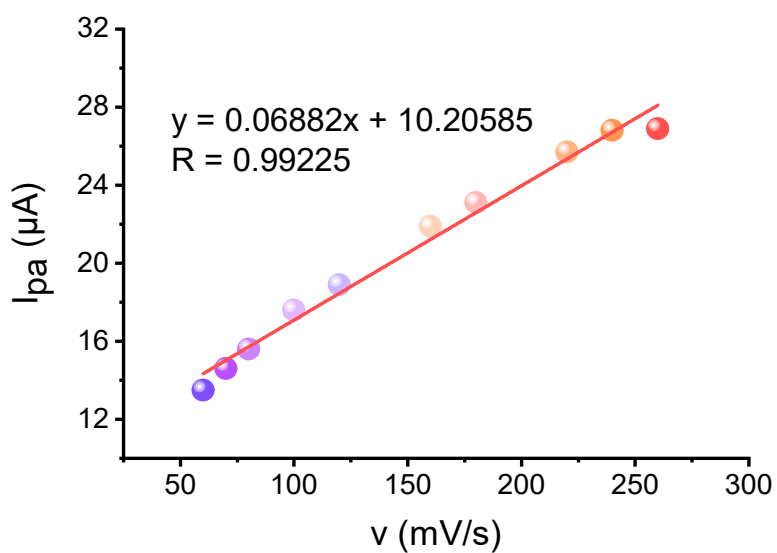

**Figure S14.** The plot of peak current versus scan rate of **2a**

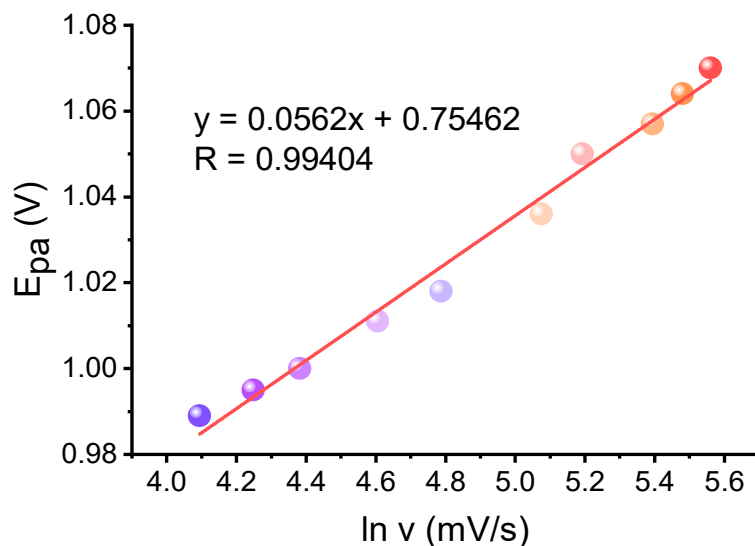

**Figure S15.** The relationship between  $E_{pa}$  of **2a** and  $\ln v$

It could be seen that the oxidation of compound **2a** was an absorption-controlled process. According to Laviron method,  $E_{pa}$  is defined by the following equation:

$$E_{pa} = E^0 + (RT/\alpha nF) \ln (RTk^0/\alpha nF) + (RT/\alpha nF) \ln v$$

In this system, the slope of  $E_{pa}$ - $\ln v$  was 0.0562. Generally, transfer coefficient  $\alpha$  was assumed as 0.5, so the value of the number of electron ( $n$ ) was calculated to be 1.

The cyclic voltammetry of  $\text{BiVO}_4$  was tested in a three-electrode configuration ( $\text{BiVO}_4/\text{FTO}$  electrode as the working electrode,  $\text{Ag}/\text{AgCl}$  as the reference electrode and Pt as the counter electrode) under 3 W blue LED ( $E = 5.00\text{-}5.15 \times 10^4 \text{ lx}$ ,  $\lambda_{\text{max}} = 450\text{-}465 \text{ nm}$ ).

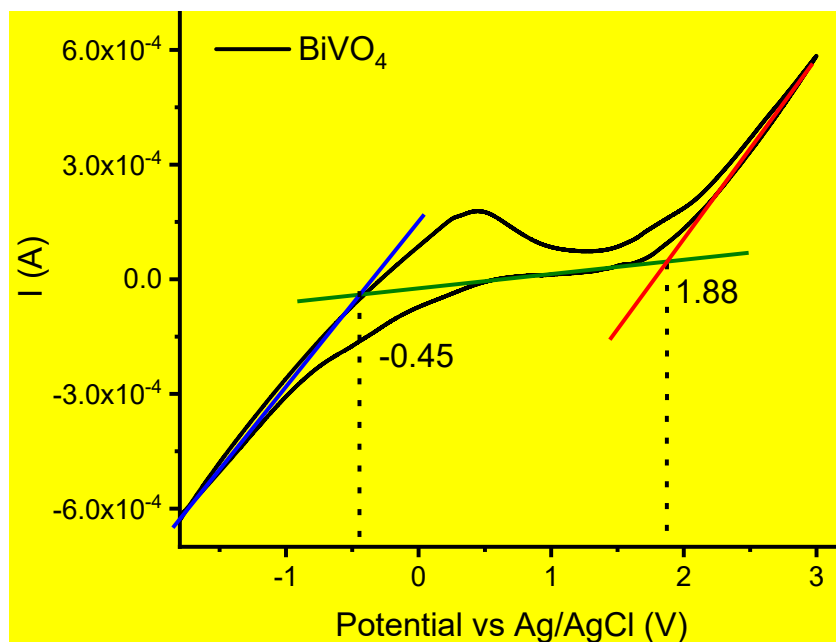

**Figure S16.** Cyclic voltammetry of  $\text{BiVO}_4$  in EtOH (5 mL) that contained  $\text{NH}_4\text{Cl}$  (0.1 M), **1a** (0.2 mmol) and **2a** (0.3 mmol)

$$E_{\text{Ag}/\text{AgCl}}(\text{reference}) = 0.1976 \text{ V vs NHE at } 25 \text{ }^\circ\text{C}$$

$$\text{the } E_{\text{CB}} = -0.25 \text{ V vs NHE and } E_{\text{VB}} = 2.1 \text{ V vs NHE.}$$

### 3) Data processing

With the reversible waves of all the reagents in hand, we calculated the excited redox potential,  $E_g$  of different reagents.

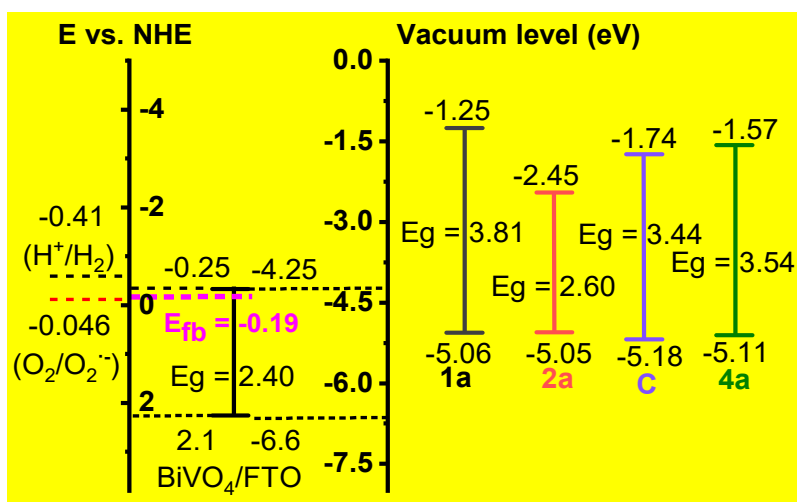

Figure S17. The  $E_{HOMO}$ ,  $E_{LUMO}$  and  $E_g$  of different reagents

## 5. Control Experiments

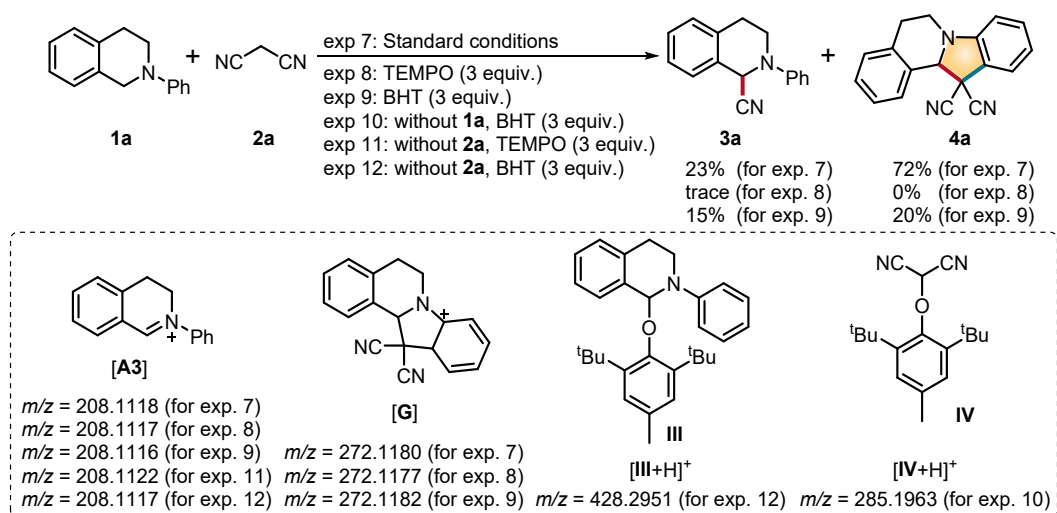

Figure S18. Control experiments

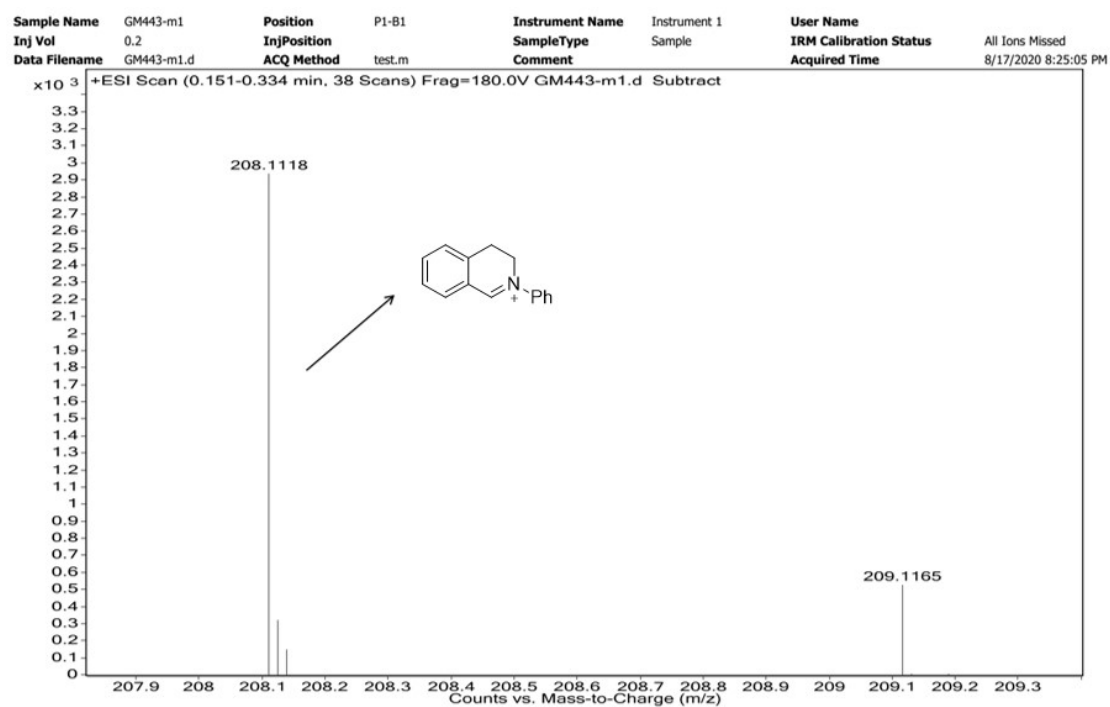

Figure S19. HRMS spectrum of compound **A3** for exp 7

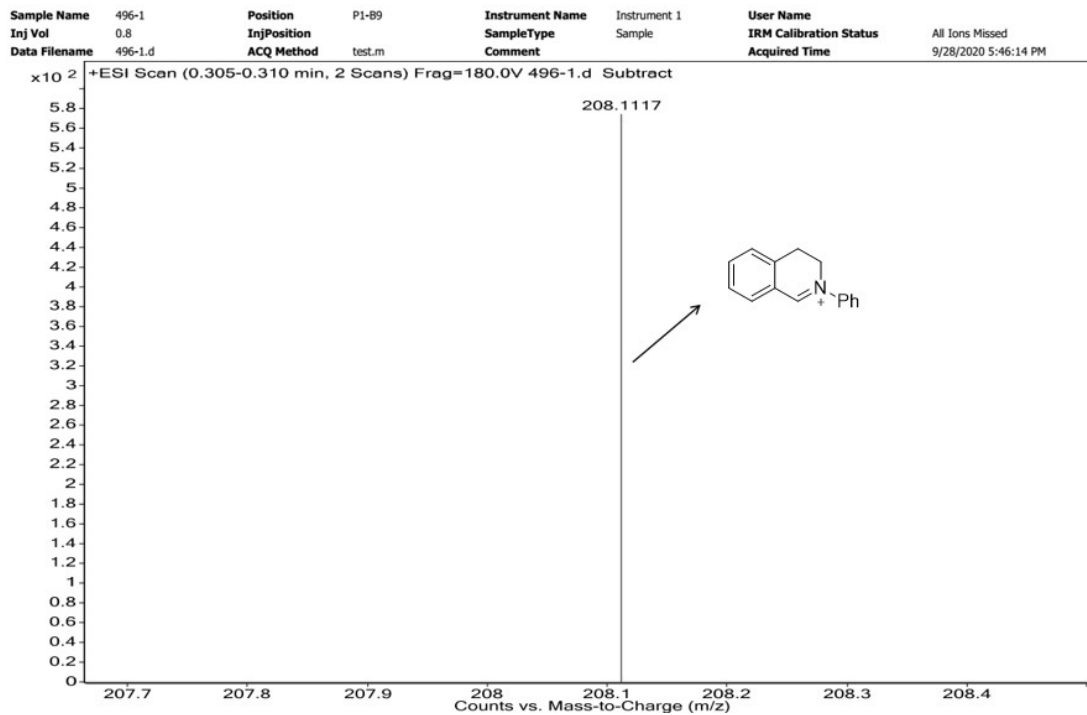

Figure S20. HRMS spectrum of compound A3 for exp 8

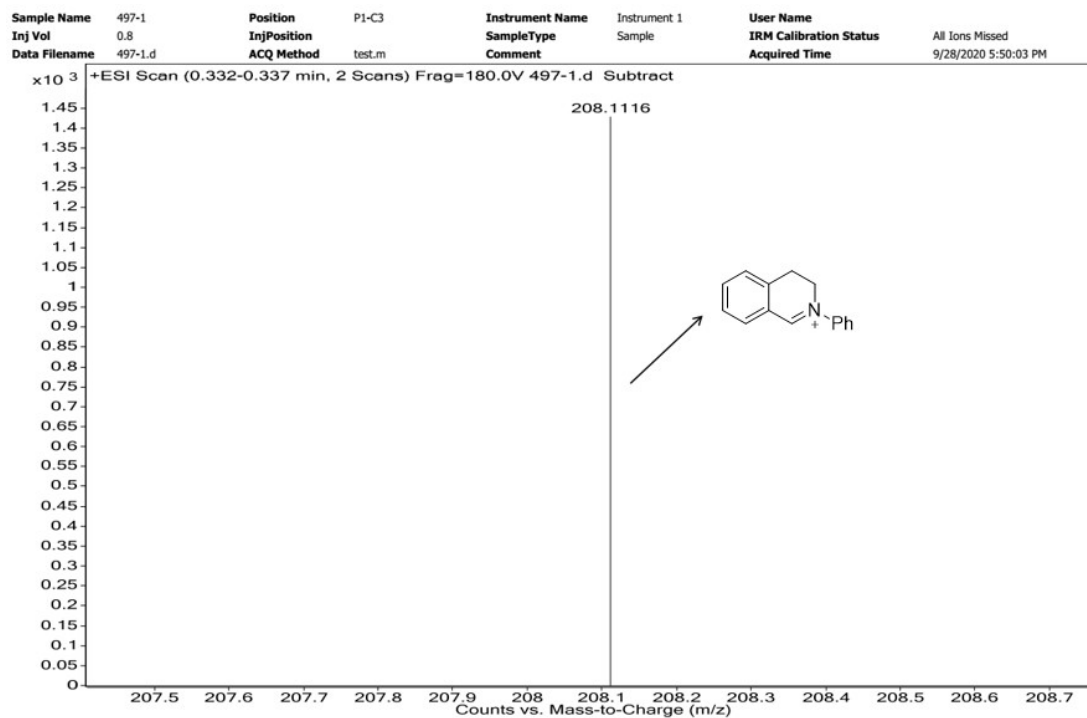

Figure S21. HRMS spectrum of compound A3 for exp 9

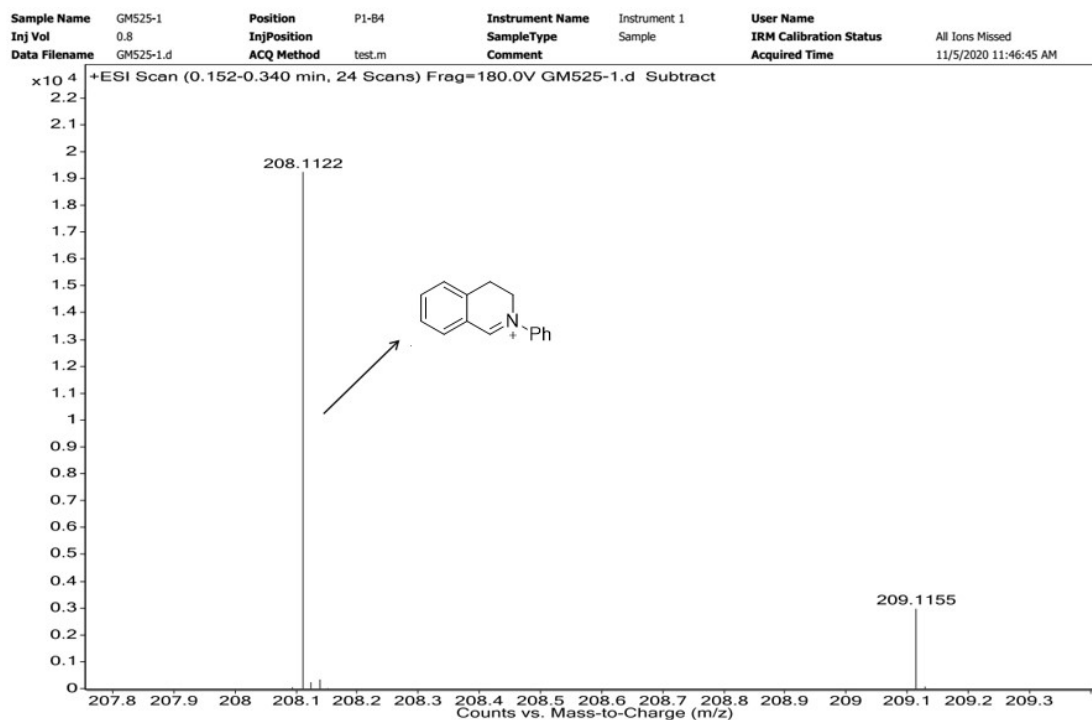

Figure S22. HRMS spectrum of compound A3 for exp 11

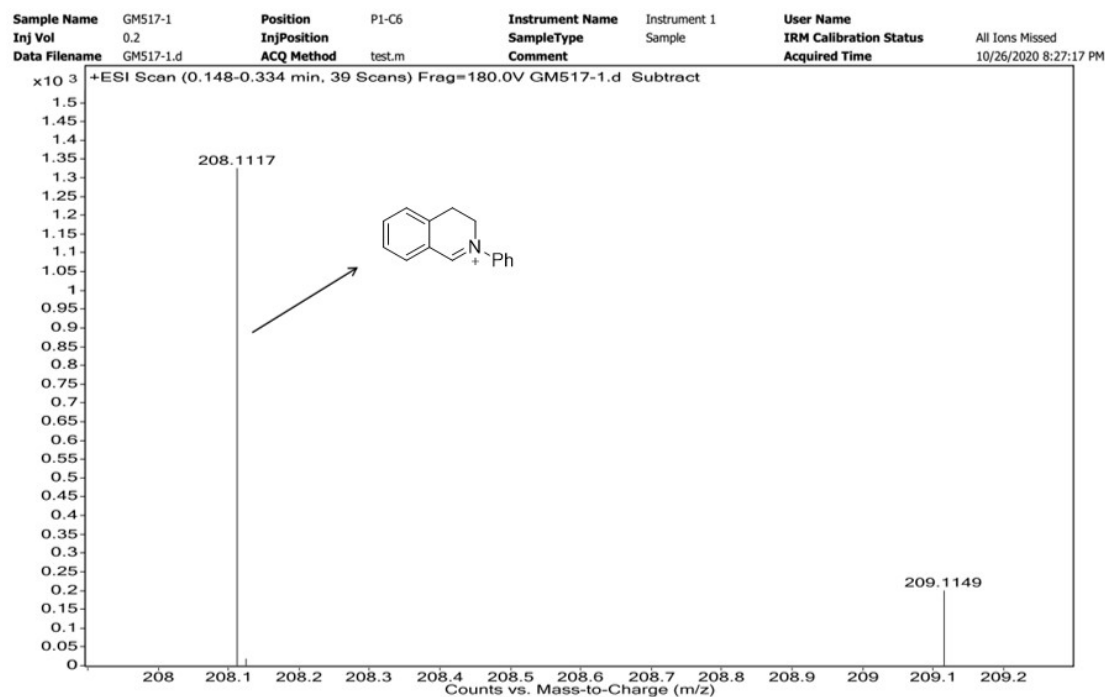

Figure S23. HRMS spectrum of compound A3 for exp 12



|               |            |             |        |                 |              |                        |                      |
|---------------|------------|-------------|--------|-----------------|--------------|------------------------|----------------------|
| Sample Name   | GM443-m1   | Position    | P1-B1  | Instrument Name | Instrument 1 | User Name              |                      |
| Inj Vol       | 0.2        | InjPosition |        | SampleType      | Sample       | IRM Calibration Status | All Ions Missed      |
| Data Filename | GM443-m1.d | ACQ Method  | test.m | Comment         |              | Acquired Time          | 8/17/2020 8:25:05 PM |

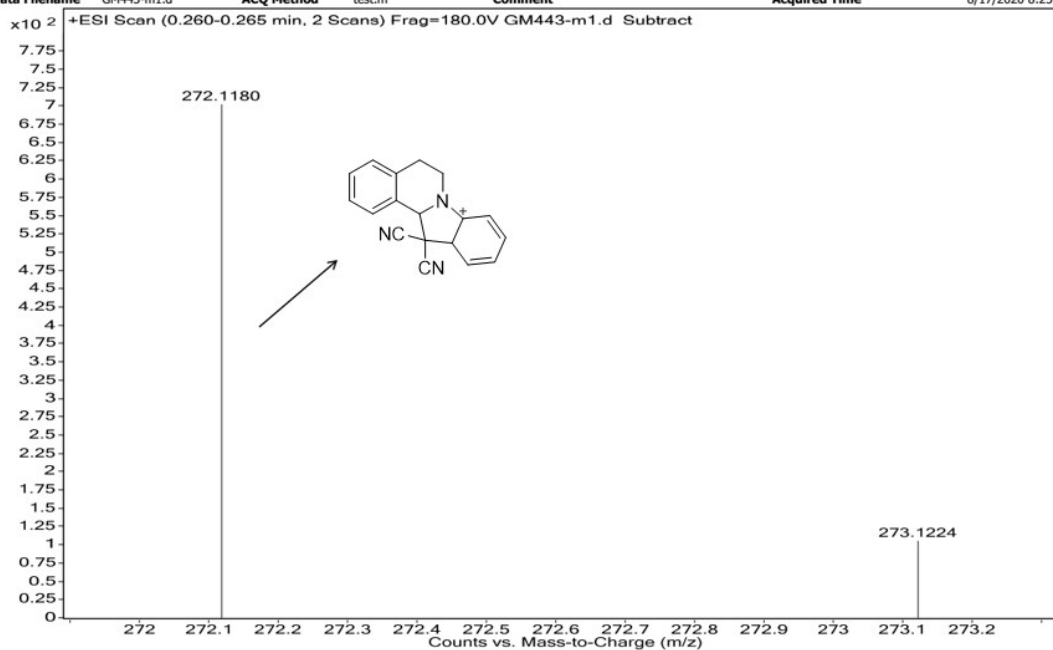

Figure S24. HRMS spectrum of compound G for exp 7

|               |         |             |        |                 |              |                        |                      |
|---------------|---------|-------------|--------|-----------------|--------------|------------------------|----------------------|
| Sample Name   | 496-1   | Position    | P1-B9  | Instrument Name | Instrument 1 | User Name              |                      |
| Inj Vol       | 0.8     | InjPosition |        | SampleType      | Sample       | IRM Calibration Status | All Ions Missed      |
| Data Filename | 496-1.d | ACQ Method  | test.m | Comment         |              | Acquired Time          | 9/28/2020 5:46:14 PM |

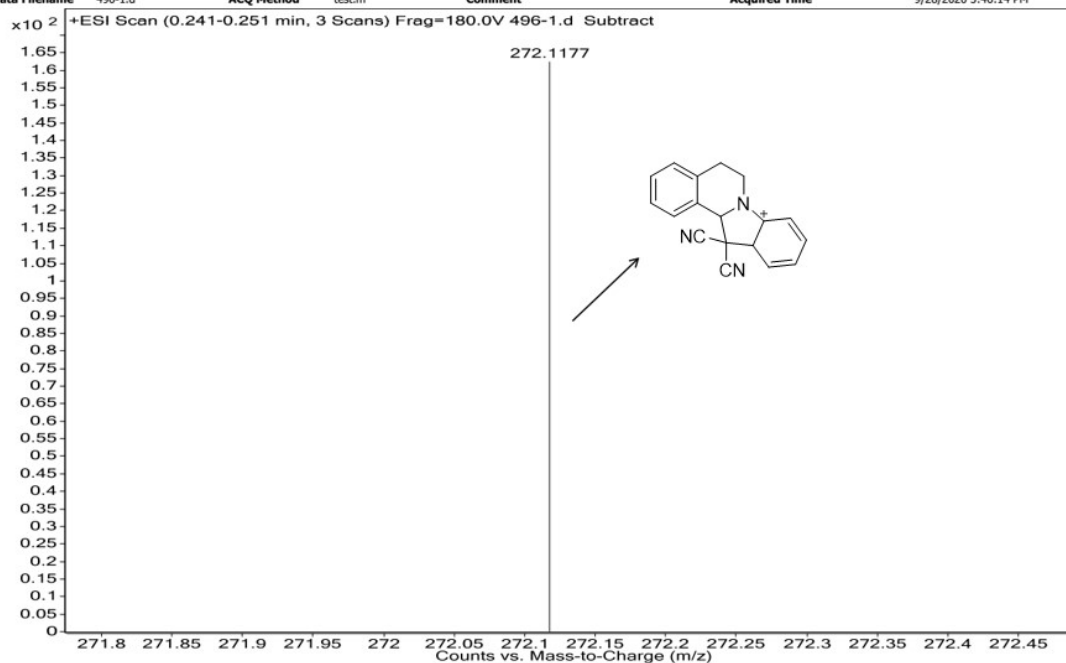

Figure S25. HRMS spectrum of compound G for exp 8

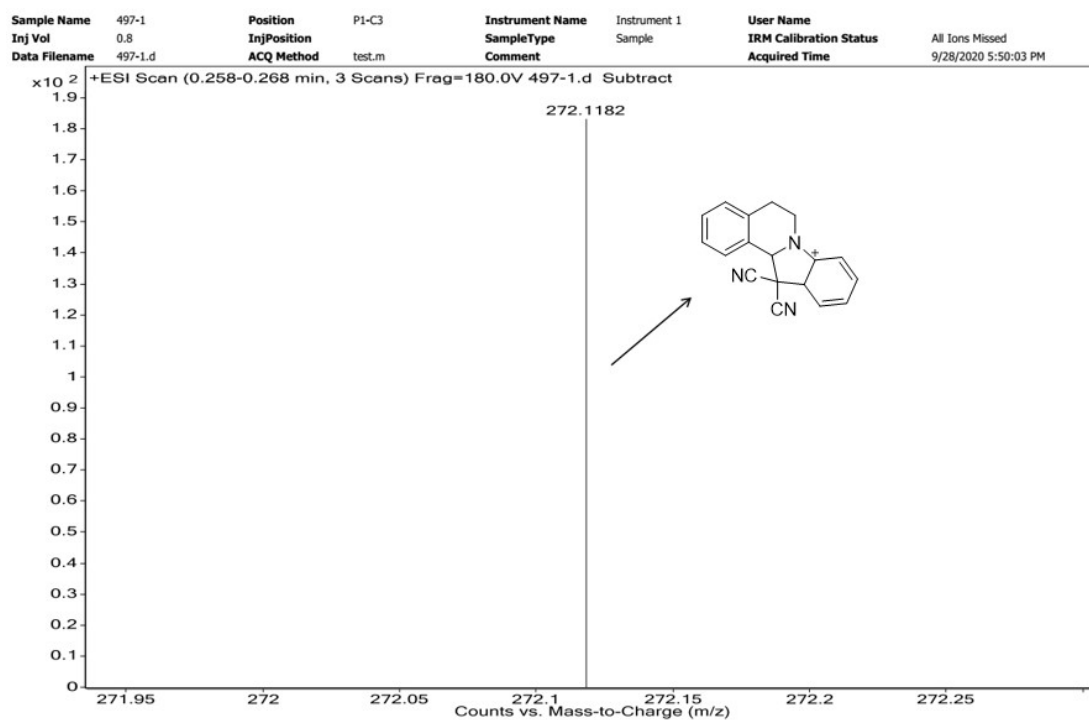

Figure S26. HRMS spectrum of compound **G** for exp 9

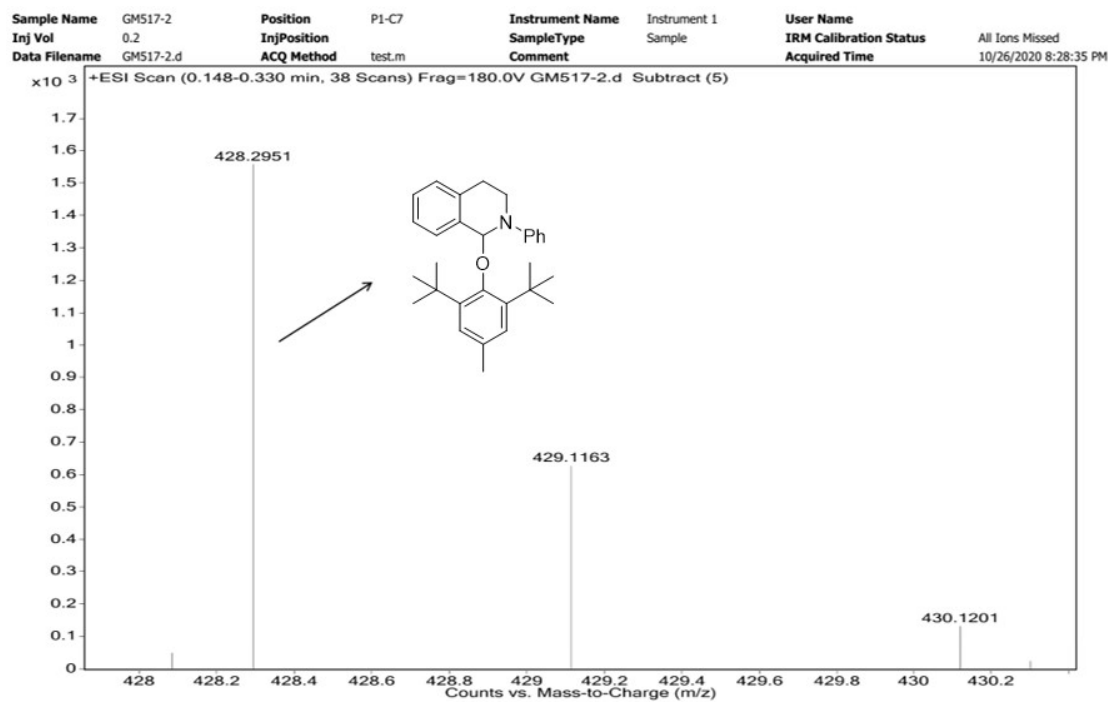

Figure S27. HRMS spectrum of compound **[III+H]<sup>+</sup>** for exp 12

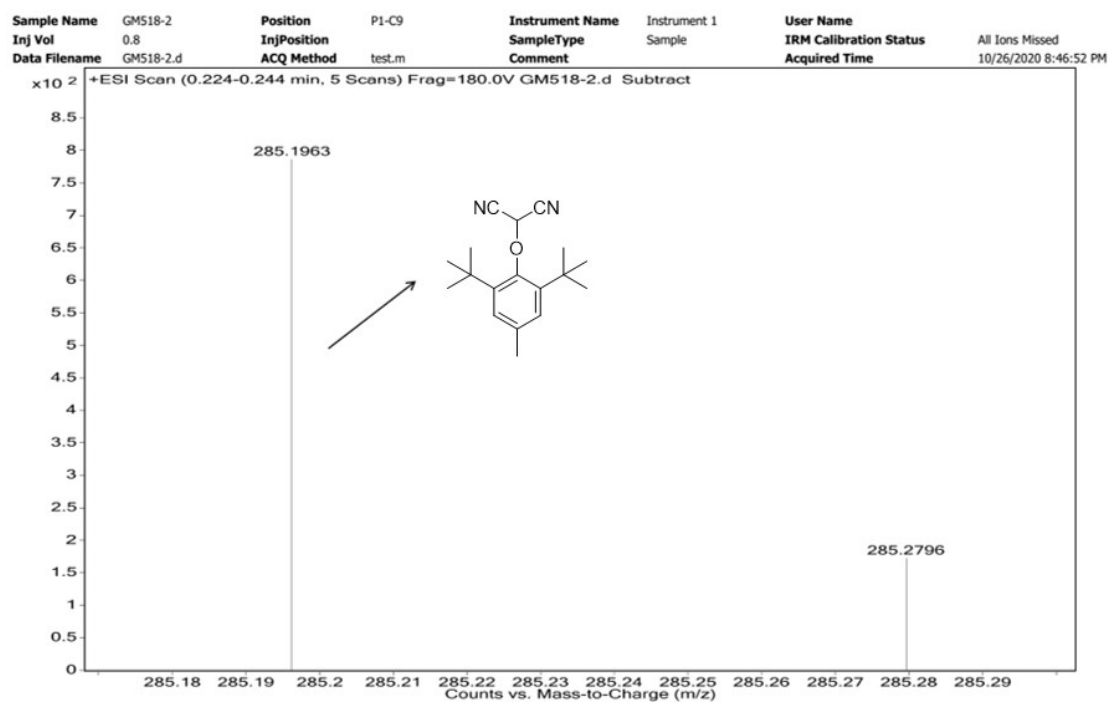

Figure S28. HRMS spectrum of compound [IV+H]<sup>+</sup> for exp 10

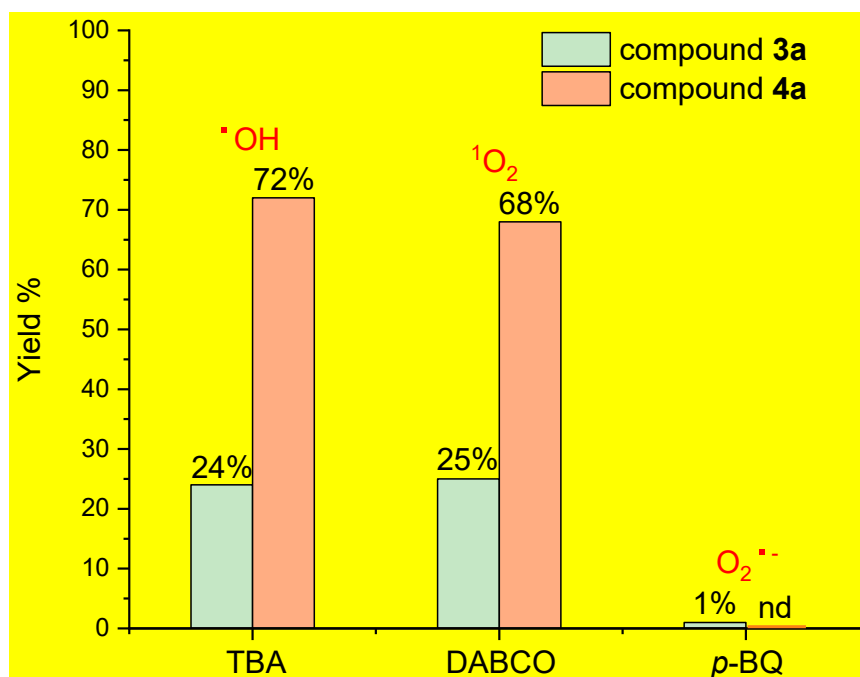

Figure S29. Quenching experiments of reactive oxygen species. Reaction conditions: **1a** (0.2 mmol), malononitrile **2a** (1.5 equiv.), quenching agent, NH<sub>4</sub>Cl (0.1 M), EtOH (5 mL) in a quartz-tube under air at room temperature, 3 W blue LED, for 5 h, isolated yield. TBA = tert-butyl alcohol (2 equiv.); DABCO = bicyclo[2.2.2]-1,4-diazaoctane (0.5 equiv.); p-BQ = 1,4-benzoquinone (0.5 equiv.).

## 6. Computational Details

All the calculations were conducted by using the Gaussian 16 program package.<sup>3</sup> The Coulomb attenuation method cam-B3LYP functional<sup>4</sup> and the def2-TZVP(D) basis set<sup>5</sup> were used for all the calculations. The polarizable continuum model (PCM)<sup>6</sup> was employed to consider the solvent effect of EtOH. The intrinsic reaction coordinate (IRC)<sup>6</sup> analysis was carried out to confirm that all the saddle point connected the correct reactant and product on the potential energy surface. With the help of Multiwfn 3.7-dew<sup>7-8</sup> and VMD VERSION 1.9.3 program<sup>9</sup>, we drawn and analyzed **TS1** and **TS2**. **A3**, **I**, **II**, **B3** and **B5** were also analyzed by ADCH<sup>10</sup>.

### 1a

|                                              |             |             |             |
|----------------------------------------------|-------------|-------------|-------------|
| Sum of electronic and zero-point Energies=   |             |             | -635.016488 |
| Sum of electronic and thermal Energies=      |             |             | -635.004258 |
| Sum of electronic and thermal Enthalpies=    |             |             | -635.003313 |
| Sum of electronic and thermal Free Energies= |             |             | -635.055895 |
| C                                            | -0.30414900 | -0.75677800 | 0.42676400  |
| H                                            | -0.11936200 | -0.83100900 | 1.51069700  |
| C                                            | -1.77392700 | -0.52813900 | 0.20135500  |
| C                                            | -2.66188800 | -1.57580000 | 0.41921700  |
| H                                            | -2.27650800 | -2.54217800 | 0.72265700  |
| H                                            | -4.70001400 | -2.22573500 | 0.42144700  |
| C                                            | -4.50955600 | -0.16155300 | -0.14020200 |
| H                                            | -5.57274400 | -0.01178200 | -0.27408300 |
| C                                            | -3.63036900 | 0.88175800  | -0.35643400 |
| H                                            | -4.00794400 | 1.85136700  | -0.65869900 |
| C                                            | -2.25963000 | 0.71280000  | -0.18875700 |
| C                                            | -1.30771900 | 1.84696700  | -0.44200700 |
| H                                            | -1.17429100 | 1.97104300  | -1.51979400 |
| H                                            | -1.73158900 | 2.78050300  | -0.06850600 |
| C                                            | 0.05021800  | 1.61529400  | 0.19320800  |
| H                                            | 0.74896000  | 2.35523900  | -0.18825600 |
| H                                            | -0.01152900 | 1.75037000  | 1.28392100  |
| N                                            | 0.53057900  | 0.28958000  | -0.14786700 |
| H                                            | -0.03006400 | -1.71758700 | -0.00025000 |
| C                                            | 1.91317300  | 0.05080200  | -0.08171500 |
| C                                            | 2.80857900  | 0.96595000  | 0.47018700  |
| C                                            | 2.43223100  | -1.13792700 | -0.60540500 |
| C                                            | 4.17128600  | 0.70611200  | 0.48147800  |
| H                                            | 2.45127900  | 1.88593600  | 0.90684000  |
| C                                            | 3.78792500  | -1.39382100 | -0.57949300 |
| H                                            | 1.76636100  | -1.85660500 | -1.06217200 |
| C                                            | 4.67311000  | -0.47211900 | -0.03737200 |
| H                                            | 4.84183000  | 1.43684100  | 0.91514500  |
| H                                            | 4.15929700  | -2.31955300 | -0.99976700 |
| H                                            | 5.73572400  | -0.67233100 | -0.02368400 |

|   |             |             |            |
|---|-------------|-------------|------------|
| C | -4.02152800 | -1.40047600 | 0.25077200 |
|---|-------------|-------------|------------|

### 2a

|                                              |             |             |             |
|----------------------------------------------|-------------|-------------|-------------|
| Sum of electronic and zero-point Energies=   |             |             | -224.926028 |
| Sum of electronic and thermal Energies=      |             |             | -224.921262 |
| Sum of electronic and thermal Enthalpies=    |             |             | -224.920317 |
| Sum of electronic and thermal Free Energies= |             |             | -224.952991 |
| C                                            | 0.00000000  | 1.21130100  | 0.02711400  |
| N                                            | 0.00000000  | 2.16811800  | -0.59660100 |
| C                                            | 0.00000000  | 0.00000000  | 0.84219400  |
| H                                            | 0.88012500  | 0.00000000  | 1.48694300  |
| H                                            | -0.88012500 | 0.00000000  | 1.48694300  |
| C                                            | 0.00000000  | -1.21130100 | 0.02711400  |
| N                                            | 0.00000000  | -2.16811800 | -0.59660100 |

### 3a

|                                              |             |             |             |
|----------------------------------------------|-------------|-------------|-------------|
| Sum of electronic and zero-point Energies=   |             |             | -727.256647 |
| Sum of electronic and thermal Energies=      |             |             | -727.242717 |
| Sum of electronic and thermal Enthalpies=    |             |             | -727.241773 |
| Sum of electronic and thermal Free Energies= |             |             | -727.298112 |
| N                                            | -0.54482600 | -0.37056000 | 0.10286600  |
| N                                            | 0.15261300  | 2.42771500  | 1.95195100  |
| C                                            | -2.49434600 | 1.03040100  | -0.37622900 |
| H                                            | -1.90025900 | 1.93139400  | -0.37920800 |
| C                                            | -3.85249300 | 1.14264700  | -0.63193900 |
| H                                            | -4.26654600 | 2.12144900  | -0.83571500 |
| C                                            | -4.67345600 | 0.03147700  | -0.61475100 |
| H                                            | -5.73286400 | 0.12473000  | -0.80928400 |
| C                                            | -4.11007300 | -1.20781700 | -0.34700500 |
| H                                            | -4.72948600 | -2.09518000 | -0.34054700 |
| C                                            | -2.75752900 | -1.33331100 | -0.10266000 |
| H                                            | -2.34479300 | -2.31712200 | 0.06529500  |
| C                                            | -1.92044100 | -0.21267200 | -0.10744400 |
| C                                            | 0.32748100  | 0.75700200  | -0.07618700 |
| H                                            | 0.02308400  | 1.30192900  | -0.96935800 |
| C                                            | 1.77725100  | 0.33662900  | -0.25613500 |
| C                                            | 2.68163200  | 1.26549100  | -0.75467400 |
| H                                            | 2.34170700  | 2.26381900  | -1.00274500 |
| C                                            | 4.00661400  | 0.92441200  | -0.93848400 |
| H                                            | 4.70411400  | 1.65187400  | -1.33055300 |
| C                                            | 4.43294000  | -0.35708500 | -0.61941600 |
| H                                            | 5.46917300  | -0.63513900 | -0.75800600 |
| C                                            | 3.53225900  | -1.27843300 | -0.12221800 |
| H                                            | 3.86590200  | -2.27755200 | 0.12979300  |

|   |             |             |             |
|---|-------------|-------------|-------------|
| C | 2.19446800  | -0.94692300 | 0.06859900  |
| C | 1.22100300  | -1.96292300 | 0.59783000  |
| H | 1.68566600  | -2.53899000 | 1.39890300  |
| H | 0.96874100  | -2.66798000 | -0.19813800 |
| C | -0.04742500 | -1.30840600 | 1.10182900  |
| H | -0.80378300 | -2.05439900 | 1.31198600  |
| H | 0.14670600  | -0.77839200 | 2.04387700  |
| C | 0.23513900  | 1.71442100  | 1.06054700  |

#### 4a

|                                              |             |             |             |
|----------------------------------------------|-------------|-------------|-------------|
| Sum of electronic and zero-point Energies=   |             |             | -857.589605 |
| Sum of electronic and thermal Energies=      |             |             | -857.573678 |
| Sum of electronic and thermal Enthalpies=    |             |             | -857.572734 |
| Sum of electronic and thermal Free Energies= |             |             | -857.633117 |
| N                                            | -0.41175300 | -1.17427400 | -0.15885100 |
| N                                            | 0.05037300  | 1.59919900  | 2.49667100  |
| N                                            | -0.66186000 | 3.34528100  | -1.36666400 |
| C                                            | 3.71516900  | -1.15569900 | 0.24729900  |
| H                                            | 4.21086000  | -2.08411000 | 0.50293700  |
| C                                            | 4.44868700  | 0.01138200  | 0.15912400  |
| H                                            | 5.51361100  | -0.00391300 | 0.34862900  |
| C                                            | 3.81730000  | 1.19784700  | -0.18064200 |
| H                                            | 4.38187700  | 2.11677700  | -0.25907400 |
| C                                            | 2.45835500  | 1.19989200  | -0.42577600 |
| H                                            | 1.97546700  | 2.12710200  | -0.70565500 |
| C                                            | 1.71492800  | 0.03021500  | -0.31908700 |
| C                                            | 2.34452100  | -1.16852500 | 0.01144400  |
| C                                            | 1.58220000  | -2.46449300 | 0.13383300  |
| H                                            | 1.44328100  | -2.69053900 | 1.19357800  |
| H                                            | 2.17350400  | -3.27738900 | -0.28824500 |
| C                                            | 0.21925600  | -2.41392900 | -0.53516600 |
| H                                            | 0.31516000  | -2.48641300 | -1.62642200 |
| H                                            | -0.39656900 | -3.24521600 | -0.20078500 |
| C                                            | 0.24383700  | 0.03141200  | -0.62272700 |
| H                                            | 0.09605000  | 0.14285000  | -1.70803400 |
| C                                            | -0.65503700 | 1.14203500  | 0.02073800  |
| C                                            | -2.01029000 | 0.43411700  | 0.00130000  |
| C                                            | -1.76780100 | -0.93583900 | -0.09539300 |
| C                                            | -2.82939900 | -1.82552600 | -0.08336100 |
| H                                            | -2.67219300 | -2.89083300 | -0.17032900 |
| C                                            | -4.11251900 | -1.30733300 | 0.03742800  |
| H                                            | -4.95165400 | -1.99032000 | 0.04394100  |
| C                                            | -4.34663300 | 0.05626000  | 0.13896300  |
| H                                            | -5.35740100 | 0.42832400  | 0.22506200  |

|   |             |            |             |
|---|-------------|------------|-------------|
| C | -3.27795100 | 0.94577000 | 0.12564900  |
| H | -3.44407100 | 2.01211300 | 0.20554900  |
| C | -0.24957000 | 1.41407600 | 1.40955200  |
| C | -0.64925700 | 2.38336100 | -0.74972000 |

### A1

|                                              |             |             |             |
|----------------------------------------------|-------------|-------------|-------------|
| Sum of electronic and zero-point Energies=   |             |             | -634.821190 |
| Sum of electronic and thermal Energies=      |             |             | -634.808932 |
| Sum of electronic and thermal Enthalpies=    |             |             | -634.807988 |
| Sum of electronic and thermal Free Energies= |             |             | -634.861670 |
| C                                            | -0.39497400 | -0.91433000 | 0.84337800  |
| H                                            | -0.47462100 | -1.13109200 | 1.91202200  |
| C                                            | -1.74859200 | -0.54985200 | 0.27425500  |
| C                                            | -2.68278900 | -1.56849100 | 0.13118900  |
| H                                            | -2.42275200 | -2.57784100 | 0.42602900  |
| H                                            | -4.65505700 | -2.10224300 | -0.49448500 |
| C                                            | -4.25962300 | -0.00988300 | -0.77136600 |
| H                                            | -5.23748100 | 0.20680000  | -1.17960200 |
| C                                            | -3.33190700 | 1.00261700  | -0.62782000 |
| H                                            | -3.58477000 | 2.01374600  | -0.92140500 |
| C                                            | -2.06993700 | 0.74683700  | -0.10266300 |
| C                                            | -1.06632600 | 1.85439000  | 0.05422500  |
| H                                            | -0.60944200 | 2.09489400  | -0.90829200 |
| H                                            | -1.55291800 | 2.76161300  | 0.41059900  |
| C                                            | 0.01174500  | 1.46536100  | 1.04897800  |
| H                                            | 0.79164100  | 2.20916600  | 1.13014700  |
| H                                            | -0.42398000 | 1.33354300  | 2.04088000  |
| N                                            | 0.57029400  | 0.16686400  | 0.68097800  |
| H                                            | -0.03608600 | -1.80541300 | 0.34600600  |
| C                                            | 1.82367700  | -0.01361400 | 0.23438700  |
| C                                            | 2.62786200  | 1.09846500  | -0.14364400 |
| C                                            | 2.38329400  | -1.31828700 | 0.13091000  |
| C                                            | 3.90087000  | 0.90331800  | -0.60159300 |
| H                                            | 2.23024700  | 2.09874500  | -0.11279000 |
| C                                            | 3.66423200  | -1.48415800 | -0.31626100 |
| H                                            | 1.82196500  | -2.18218700 | 0.44438800  |
| C                                            | 4.43383800  | -0.38248300 | -0.68992000 |
| H                                            | 4.49326600  | 1.75496000  | -0.90320700 |
| H                                            | 4.08294300  | -2.47857500 | -0.37119200 |
| H                                            | 5.44375000  | -0.52528900 | -1.04724300 |
| C                                            | -3.93449900 | -1.30303400 | -0.38717100 |

### A2

|                                            |  |  |             |
|--------------------------------------------|--|--|-------------|
| Sum of electronic and zero-point Energies= |  |  | -634.403246 |
|--------------------------------------------|--|--|-------------|

|                                              |             |             |             |
|----------------------------------------------|-------------|-------------|-------------|
| Sum of electronic and thermal Energies=      |             |             | -634.391127 |
| Sum of electronic and thermal Enthalpies=    |             |             | -634.390183 |
| Sum of electronic and thermal Free Energies= |             |             | -634.442683 |
| C                                            | 0.35657500  | -0.76814600 | -0.14371500 |
| C                                            | 1.74647200  | -0.56315800 | -0.09585400 |
| C                                            | 2.65389000  | -1.60896200 | -0.37151600 |
| H                                            | 2.26673800  | -2.58843300 | -0.62430100 |
| H                                            | 4.69219100  | -2.20454400 | -0.54522200 |
| C                                            | 4.51483200  | -0.12972400 | -0.01523200 |
| H                                            | 5.58217400  | 0.04247900  | 0.00994700  |
| C                                            | 3.63166600  | 0.90736800  | 0.26679900  |
| H                                            | 4.01770500  | 1.88862700  | 0.51745900  |
| C                                            | 2.26712400  | 0.71029700  | 0.23957000  |
| C                                            | 1.27878500  | 1.77867900  | 0.59639700  |
| H                                            | 1.04972600  | 1.72460600  | 1.66544300  |
| H                                            | 1.69191100  | 2.76989600  | 0.40927900  |
| C                                            | -0.01618100 | 1.62172000  | -0.18364900 |
| H                                            | -0.75733700 | 2.31893800  | 0.19540800  |
| H                                            | 0.15199600  | 1.84695700  | -1.24220500 |
| N                                            | -0.53720200 | 0.26635000  | -0.04347200 |
| H                                            | -0.04926300 | -1.74691100 | -0.34459300 |
| C                                            | -1.91330100 | 0.03160000  | -0.01584500 |
| C                                            | -2.81424800 | 0.96432300  | -0.53347900 |
| C                                            | -2.41808500 | -1.15168200 | 0.52986700  |
| C                                            | -4.17497600 | 0.71616000  | -0.50077800 |
| H                                            | -2.45621600 | 1.87706900  | -0.98547100 |
| C                                            | -3.77909000 | -1.39115500 | 0.54718300  |
| H                                            | -1.74384100 | -1.87249800 | 0.96883800  |
| C                                            | -4.67045100 | -0.46127200 | 0.03478800  |
| H                                            | -4.85327700 | 1.45218500  | -0.91220200 |
| H                                            | -4.14621400 | -2.31192100 | 0.98146100  |
| H                                            | -5.73472600 | -0.65096900 | 0.05493600  |
| C                                            | 4.01179600  | -1.39103800 | -0.32861400 |

### A3

|                                              |            |             |             |
|----------------------------------------------|------------|-------------|-------------|
| Sum of electronic and zero-point Energies=   |            |             | -634.263322 |
| Sum of electronic and thermal Energies=      |            |             | -634.251472 |
| Sum of electronic and thermal Enthalpies=    |            |             | -634.250528 |
| Sum of electronic and thermal Free Energies= |            |             | -634.302080 |
| C                                            | 1.74898700 | -0.54039700 | -0.11095300 |
| C                                            | 2.59209400 | -1.60055300 | -0.44606200 |
| H                                            | 2.16887400 | -2.55646600 | -0.72430500 |
| H                                            | 4.62142900 | -2.22173300 | -0.69774500 |
| C                                            | 4.47279300 | -0.17698600 | -0.06325700 |



|   |             |             |             |
|---|-------------|-------------|-------------|
| H | 5.54416100  | -0.02899200 | -0.04794200 |
| C | 3.63619500  | 0.87260800  | 0.28970900  |
| H | 4.05610300  | 1.82531200  | 0.58308900  |
| C | 2.26719500  | 0.70484600  | 0.26560700  |
| C | 1.29587400  | 1.76296400  | 0.69266200  |
| H | 1.11427100  | 1.66594600  | 1.76648700  |
| H | 1.70577500  | 2.75721900  | 0.52732800  |
| C | -0.00968900 | 1.64666200  | -0.06238000 |
| H | -0.77821500 | 2.27066300  | 0.38037000  |
| H | 0.11420500  | 1.93118600  | -1.10834100 |
| N | -0.50623300 | 0.25121900  | -0.04619900 |
| C | -1.92158900 | 0.02038200  | -0.02289000 |
| C | -2.74541200 | 0.77500500  | -0.84136700 |
| C | -2.43679400 | -0.94933200 | 0.81948500  |
| C | -4.10712300 | 0.53594800  | -0.82421800 |
| H | -2.33267100 | 1.52759700  | -1.49769500 |
| C | -3.80109400 | -1.18076900 | 0.82490800  |
| H | -1.78410800 | -1.50014800 | 1.48247700  |
| C | -4.63593000 | -0.44118400 | 0.00452800  |
| H | -4.75632900 | 1.11410200  | -1.46667800 |
| H | -4.21062600 | -1.93339500 | 1.48391700  |
| H | -5.70195200 | -0.62112600 | 0.01512100  |
| C | 3.95722700  | -1.41266700 | -0.43019800 |
| C | 0.33127500  | -0.72730200 | -0.12230500 |
| H | -0.08132600 | -1.72405000 | -0.21231200 |

### B1

|                                              |             |             |             |
|----------------------------------------------|-------------|-------------|-------------|
| Sum of electronic and zero-point Energies=   |             |             | -224.565253 |
| Sum of electronic and thermal Energies=      |             |             | -224.559710 |
| Sum of electronic and thermal Enthalpies=    |             |             | -224.558766 |
| Sum of electronic and thermal Free Energies= |             |             | -224.593504 |
| C                                            | 0.00000000  | 1.21723000  | 0.01330800  |
| N                                            | 0.00000000  | 2.23861400  | -0.54008400 |
| C                                            | 0.00000000  | 0.00000000  | 0.73384900  |
| H                                            | 0.82583800  | 0.00000000  | 1.49918900  |
| H                                            | -0.82583800 | 0.00000000  | 1.49918900  |
| C                                            | 0.00000000  | -1.21723000 | 0.01330800  |
| N                                            | 0.00000000  | -2.23861400 | -0.54008400 |

### B2

|                                              |  |  |             |
|----------------------------------------------|--|--|-------------|
| Sum of electronic and zero-point Energies=   |  |  | -224.992980 |
| Sum of electronic and thermal Energies=      |  |  | -224.987722 |
| Sum of electronic and thermal Enthalpies=    |  |  | -224.986778 |
| Sum of electronic and thermal Free Energies= |  |  | -225.021911 |

|   |             |             |             |
|---|-------------|-------------|-------------|
| C | 0.04658300  | 0.99899100  | 0.00000500  |
| H | 0.00544200  | 1.64419400  | 0.87635300  |
| H | 0.00544100  | 1.64420300  | -0.87633600 |
| C | -1.10791900 | 0.11349600  | 0.00000100  |
| C | 1.41993800  | 0.23821000  | 0.00000100  |
| N | -1.93851900 | -0.68035800 | -0.00000200 |
| N | 1.62959200  | -0.94715400 | -0.00000700 |

### B3

|                                              |            |             |             |
|----------------------------------------------|------------|-------------|-------------|
| Sum of electronic and zero-point Energies=   |            |             | -224.469065 |
| Sum of electronic and thermal Energies=      |            |             | -224.464397 |
| Sum of electronic and thermal Enthalpies=    |            |             | -224.463452 |
| Sum of electronic and thermal Free Energies= |            |             | -224.496402 |
| C                                            | 0.00000000 | 0.05797500  | -1.20845200 |
| N                                            | 0.00000000 | -0.49530800 | -2.22986100 |
| C                                            | 0.00000000 | 0.73707800  | 0.00000000  |
| H                                            | 0.00000000 | 1.81614000  | 0.00000000  |
| C                                            | 0.00000000 | 0.05797500  | 1.20845200  |
| N                                            | 0.00000000 | -0.49530800 | 2.22986100  |

### B4

|                                              |            |             |             |
|----------------------------------------------|------------|-------------|-------------|
| Sum of electronic and zero-point Energies=   |            |             | -224.290165 |
| Sum of electronic and thermal Energies=      |            |             | -224.285441 |
| Sum of electronic and thermal Enthalpies=    |            |             | -224.284496 |
| Sum of electronic and thermal Free Energies= |            |             | -224.317545 |
| C                                            | 0.00000000 | 1.21423900  | 0.05429800  |
| N                                            | 0.00000000 | 2.22882900  | -0.49257900 |
| C                                            | 0.00000000 | 0.00000000  | 0.73755200  |
| H                                            | 0.00000000 | 0.00000000  | 1.81922800  |
| C                                            | 0.00000000 | -1.21423900 | 0.05429800  |
| N                                            | 0.00000000 | -2.22882900 | -0.49257900 |

### B5

|                                              |            |            |             |
|----------------------------------------------|------------|------------|-------------|
| Sum of electronic and zero-point Energies=   |            |            | -92.950860  |
| Sum of electronic and thermal Energies=      |            |            | -92.948499  |
| Sum of electronic and thermal Enthalpies=    |            |            | -92.947555  |
| Sum of electronic and thermal Free Energies= |            |            | -92.969878  |
| C                                            | 0.00000000 | 0.00000000 | -0.62606500 |
| N                                            | 0.00000000 | 0.00000000 | 0.53662700  |

### C

|                                            |  |  |             |
|--------------------------------------------|--|--|-------------|
| Sum of electronic and zero-point Energies= |  |  | -858.764070 |
| Sum of electronic and thermal Energies=    |  |  | -858.746967 |
| Sum of electronic and thermal Enthalpies=  |  |  | -858.746023 |

|                                              |             |             |             |
|----------------------------------------------|-------------|-------------|-------------|
| Sum of electronic and thermal Free Energies= |             |             | -858.810444 |
| N                                            | 0.56898200  | -0.63268900 | -0.26557000 |
| C                                            | 2.23337500  | -0.32958300 | 1.47599900  |
| H                                            | 1.45308000  | -0.13914800 | 2.19907500  |
| C                                            | 3.55017300  | -0.31675900 | 1.89430600  |
| H                                            | 3.77096700  | -0.09571500 | 2.93042400  |
| C                                            | 4.57869000  | -0.60256100 | 1.01002500  |
| H                                            | 5.60762600  | -0.59695600 | 1.34212300  |
| C                                            | 4.26318500  | -0.89767100 | -0.30459800 |
| H                                            | 5.04948600  | -1.11684700 | -1.01519800 |
| C                                            | 2.94816300  | -0.89669600 | -0.73717800 |
| H                                            | 2.74031100  | -1.08982500 | -1.77888500 |
| C                                            | 1.90837500  | -0.61213300 | 0.14721300  |
| C                                            | -0.35954400 | 0.35394800  | 0.20735300  |
| H                                            | -0.03518000 | 0.72556000  | 1.17312100  |
| C                                            | -1.75683000 | -0.20283600 | 0.33733800  |
| C                                            | -2.66713600 | 0.40313300  | 1.19610500  |
| H                                            | -2.35890700 | 1.25271200  | 1.79069800  |
| C                                            | -3.95857500 | -0.07396600 | 1.30734200  |
| H                                            | -4.65636800 | 0.40548000  | 1.98015200  |
| C                                            | -4.34850000 | -1.17194000 | 0.55571700  |
| H                                            | -5.35869000 | -1.55182200 | 0.63063000  |
| C                                            | -3.43797100 | -1.79193200 | -0.27799500 |
| H                                            | -3.73508800 | -2.66413700 | -0.84734300 |
| C                                            | -2.13370800 | -1.32408400 | -0.39378300 |
| C                                            | -1.13850700 | -2.08032200 | -1.22955500 |
| H                                            | -1.58479500 | -2.35865700 | -2.18506400 |
| H                                            | -0.90615200 | -3.01335600 | -0.71025900 |
| C                                            | 0.15800000  | -1.32468100 | -1.47270000 |
| H                                            | 0.93056500  | -2.03344700 | -1.74992600 |
| H                                            | 0.04951500  | -0.63670400 | -2.32009000 |
| C                                            | -0.37327000 | 1.60645800  | -0.77104800 |
| H                                            | -0.75140500 | 1.27343700  | -1.73952800 |
| C                                            | -1.24748500 | 2.68426900  | -0.31564700 |
| C                                            | 0.97163900  | 2.14321800  | -0.98008600 |
| N                                            | -1.92512600 | 3.53076500  | 0.04545200  |
| N                                            | 2.01965500  | 2.56538900  | -1.15027800 |

#### D

|                                              |             |             |             |
|----------------------------------------------|-------------|-------------|-------------|
| Sum of electronic and zero-point Energies=   |             |             | -858.555512 |
| Sum of electronic and thermal Energies=      |             |             | -858.538478 |
| Sum of electronic and thermal Enthalpies=    |             |             | -858.537534 |
| Sum of electronic and thermal Free Energies= |             |             | -858.602320 |
| N                                            | -0.67842000 | -0.23332900 | 0.52383400  |

|   |             |             |             |
|---|-------------|-------------|-------------|
| C | -2.33860700 | 0.39656000  | -1.11461900 |
| H | -1.73598700 | 1.20440900  | -1.49326300 |
| C | -3.57435700 | 0.19600100  | -1.65649100 |
| H | -3.91008500 | 0.83181100  | -2.46251500 |
| C | -4.40867900 | -0.81279900 | -1.16989400 |
| H | -5.38394500 | -0.96533300 | -1.60961300 |
| C | -3.98333200 | -1.62447000 | -0.11613300 |
| H | -4.62370500 | -2.41423200 | 0.24855500  |
| C | -2.75738800 | -1.43707600 | 0.45251600  |
| H | -2.44055500 | -2.09846700 | 1.24060400  |
| C | -1.88754400 | -0.41637900 | -0.03279200 |
| C | 0.38212700  | 0.54536700  | -0.11138100 |
| H | 0.04830500  | 0.86103900  | -1.09044200 |
| C | 1.62264700  | -0.30764300 | -0.28963800 |
| C | 2.55196300  | 0.07473800  | -1.25089200 |
| H | 2.36858200  | 0.94573700  | -1.86483700 |
| C | 3.70621500  | -0.65820000 | -1.43739000 |
| H | 4.42469800  | -0.35002000 | -2.18393700 |
| C | 3.93060000  | -1.79156800 | -0.67090900 |
| H | 4.83244900  | -2.37190200 | -0.81016600 |
| C | 2.99267200  | -2.19006200 | 0.26028600  |
| H | 3.15669700  | -3.08749400 | 0.84298400  |
| C | 1.82704800  | -1.46050100 | 0.46105700  |
| C | 0.78915400  | -1.96246400 | 1.42467200  |
| H | 1.25421100  | -2.29242400 | 2.35258200  |
| H | 0.28707400  | -2.83120600 | 0.99359500  |
| C | -0.23846400 | -0.89777000 | 1.75281000  |
| H | -1.08853500 | -1.29023800 | 2.29203100  |
| H | 0.20198500  | -0.13368400 | 2.39095500  |
| C | 0.66356400  | 1.83641400  | 0.73582800  |
| H | 1.16510400  | 1.55951500  | 1.66484400  |
| C | 1.55491400  | 2.75357700  | 0.02676200  |
| C | -0.58224400 | 2.52504800  | 1.08148700  |
| N | 2.24737300  | 3.47436900  | -0.52492700 |
| N | -1.57724300 | 3.01894000  | 1.34637300  |

## E

|                                              |             |             |             |
|----------------------------------------------|-------------|-------------|-------------|
| Sum of electronic and zero-point Energies=   |             |             | -858.139167 |
| Sum of electronic and thermal Energies=      |             |             | -858.122052 |
| Sum of electronic and thermal Enthalpies=    |             |             | -858.121107 |
| Sum of electronic and thermal Free Energies= |             |             | -858.186278 |
| N                                            | -0.49046000 | -0.74155600 | 0.09256100  |
| C                                            | -2.40381300 | -0.57079600 | -1.38448900 |
| H                                            | -1.73727800 | -0.52145300 | -2.23429600 |

|   |             |             |             |
|---|-------------|-------------|-------------|
| C | -3.76906500 | -0.53483100 | -1.58867600 |
| H | -4.15176500 | -0.44210100 | -2.59632100 |
| C | -4.64520400 | -0.63269100 | -0.51792700 |
| H | -5.71373100 | -0.60847900 | -0.68166500 |
| C | -4.13482200 | -0.76237100 | 0.76154400  |
| H | -4.80414600 | -0.83271600 | 1.60866000  |
| C | -2.76677700 | -0.78523000 | 0.97668000  |
| H | -2.38982000 | -0.85684700 | 1.98644100  |
| C | -1.88388900 | -0.69458300 | -0.09593500 |
| C | 0.32646000  | 0.29494900  | -0.51636300 |
| H | -0.02324000 | 0.46765300  | -1.52985100 |
| C | 1.78954400  | -0.06418500 | -0.56485300 |
| C | 2.64178100  | 0.73850600  | -1.31510100 |
| H | 2.23700700  | 1.58406600  | -1.85816000 |
| C | 3.99329900  | 0.46688400  | -1.37211100 |
| H | 4.64841500  | 1.09468400  | -1.96042900 |
| C | 4.50269400  | -0.61663300 | -0.66948700 |
| H | 5.56128200  | -0.83693200 | -0.70346400 |
| C | 3.65635200  | -1.41312300 | 0.07583500  |
| H | 4.05448000  | -2.25658200 | 0.62626300  |
| C | 2.29123100  | -1.14967300 | 0.13930600  |
| C | 1.37761700  | -2.03921500 | 0.93299500  |
| H | 1.87605800  | -2.36389200 | 1.84678300  |
| H | 1.16366900  | -2.93903100 | 0.35116000  |
| C | 0.06655900  | -1.36181800 | 1.28392500  |
| H | -0.64170700 | -2.10373500 | 1.64025300  |
| H | 0.21261000  | -0.64074400 | 2.09571200  |
| C | 0.08995100  | 1.57528300  | 0.27167800  |
| C | 0.84520100  | 1.86839600  | 1.41040200  |
| C | -0.99430700 | 2.39990200  | -0.04056500 |
| N | 1.49247000  | 2.09215100  | 2.33785300  |
| N | -1.88611000 | 3.06990500  | -0.33216200 |

## F

|                                              |             |             |             |
|----------------------------------------------|-------------|-------------|-------------|
| Sum of electronic and zero-point Energies=   |             |             | -858.133075 |
| Sum of electronic and thermal Energies=      |             |             | -858.116792 |
| Sum of electronic and thermal Enthalpies=    |             |             | -858.115847 |
| Sum of electronic and thermal Free Energies= |             |             | -858.177620 |
| N                                            | -0.46343000 | -1.02153500 | -0.95019900 |
| N                                            | -0.21353700 | 0.68542100  | 2.45758100  |
| N                                            | -0.19999500 | 3.67060200  | -0.64074900 |
| C                                            | 3.43063500  | -1.23537500 | 0.65982100  |
| H                                            | 3.75210000  | -2.15381100 | 1.13479800  |
| C                                            | 4.31273100  | -0.17899900 | 0.53477800  |

|   |             |             |             |
|---|-------------|-------------|-------------|
| H | 5.31957400  | -0.26777000 | 0.92022900  |
| C | 3.91092400  | 0.98513800  | -0.10266100 |
| H | 4.59959000  | 1.81046600  | -0.22052100 |
| C | 2.62588400  | 1.08152800  | -0.59924300 |
| H | 2.31693800  | 1.98266800  | -1.11375600 |
| C | 1.72762000  | 0.03175800  | -0.44618100 |
| C | 2.13081500  | -1.14621700 | 0.17635700  |
| C | 1.18405600  | -2.30895600 | 0.27801200  |
| H | 0.61587700  | -2.25753700 | 1.21028400  |
| H | 1.74402100  | -3.24380700 | 0.29429700  |
| C | 0.21652600  | -2.29719200 | -0.89325300 |
| H | 0.75349900  | -2.46619300 | -1.82902200 |
| H | -0.52726500 | -3.08195000 | -0.79778700 |
| C | 0.31986600  | 0.20310000  | -0.94879500 |
| H | 0.34804400  | 0.64831700  | -1.94846600 |
| C | -0.57566900 | 1.15963800  | -0.08015300 |
| C | -1.99685900 | 0.66480800  | -0.51624200 |
| C | -1.76281300 | -0.81329500 | -0.59467800 |
| C | -2.74241800 | -1.71265800 | -0.28708700 |
| H | -2.58186000 | -2.77351700 | -0.41633200 |
| C | -3.94665600 | -1.25455400 | 0.27524100  |
| H | -4.72201600 | -1.96463800 | 0.52324500  |
| C | -4.11159900 | 0.10845000  | 0.61027300  |
| H | -5.00806900 | 0.41107000  | 1.13622700  |
| C | -3.17913700 | 1.04284200  | 0.30224300  |
| H | -3.32011100 | 2.08551100  | 0.55340300  |
| C | -0.36352600 | 0.91269200  | 1.34784500  |
| C | -0.35460500 | 2.56869800  | -0.37875600 |
| H | -2.10623600 | 1.06133200  | -1.53815800 |

## G

|                                              |             |             |             |
|----------------------------------------------|-------------|-------------|-------------|
| Sum of electronic and zero-point Energies=   |             |             | -857.977100 |
| Sum of electronic and thermal Energies=      |             |             | -857.961075 |
| Sum of electronic and thermal Enthalpies=    |             |             | -857.960131 |
| Sum of electronic and thermal Free Energies= |             |             | -858.020570 |
| N                                            | -0.47362700 | -1.06283300 | -0.78421200 |
| N                                            | -0.16097000 | 1.02862700  | 2.43477200  |
| N                                            | -0.32819000 | 3.62860700  | -0.99000300 |
| C                                            | 3.47598000  | -1.24328000 | 0.60253000  |
| H                                            | 3.84051200  | -2.17958900 | 1.00501000  |
| C                                            | 4.30581900  | -0.14024700 | 0.56433600  |
| H                                            | 5.31556700  | -0.21206800 | 0.94474100  |
| C                                            | 3.84917200  | 1.05161300  | 0.02255400  |
| H                                            | 4.49737200  | 1.91526800  | -0.02647900 |

|   |             |             |             |
|---|-------------|-------------|-------------|
| C | 2.56108600  | 1.12926500  | -0.46609500 |
| H | 2.21301100  | 2.05542500  | -0.90424100 |
| C | 1.71658400  | 0.02708600  | -0.39945300 |
| C | 2.17309600  | -1.17848100 | 0.12375400  |
| C | 1.29251900  | -2.39795500 | 0.15750300  |
| H | 0.81654400  | -2.49405900 | 1.13576200  |
| H | 1.89209400  | -3.29378100 | 0.00475400  |
| C | 0.22144000  | -2.33681100 | -0.91430100 |
| H | 0.65671700  | -2.37581600 | -1.91280000 |
| H | -0.49732900 | -3.14285100 | -0.81962300 |
| C | 0.30904700  | 0.17313700  | -0.90532600 |
| H | 0.30941900  | 0.47967000  | -1.95477100 |
| C | -0.60614200 | 1.18708100  | -0.13280500 |
| C | -2.00924000 | 0.60778700  | -0.45794900 |
| C | -1.72442700 | -0.85514300 | -0.51695200 |
| C | -2.74663300 | -1.79628600 | -0.25014800 |
| H | -2.60560200 | -2.84812700 | -0.44055400 |
| C | -3.86342500 | -1.33254300 | 0.35311800  |
| H | -4.63881500 | -2.03879200 | 0.61802900  |
| C | -4.06750100 | 0.05477300  | 0.71131400  |
| H | -4.96317500 | 0.31619300  | 1.25493400  |
| C | -3.18495500 | 0.98997100  | 0.36392500  |
| H | -3.34019700 | 2.03706400  | 0.58344300  |
| C | -0.34701700 | 1.11935000  | 1.31207800  |
| C | -0.44158200 | 2.55989000  | -0.60457600 |
| H | -2.23954500 | 0.90542200  | -1.49315100 |

## H

|                                              |             |             |             |
|----------------------------------------------|-------------|-------------|-------------|
| Sum of electronic and zero-point Energies=   |             |             | -375.272485 |
| Sum of electronic and thermal Energies=      |             |             | -375.265418 |
| Sum of electronic and thermal Enthalpies=    |             |             | -375.264473 |
| Sum of electronic and thermal Free Energies= |             |             | -375.303923 |
| C                                            | 1.55899100  | -0.25025500 | 0.08042600  |
| N                                            | 2.67108600  | -0.36568600 | -0.14815400 |
| C                                            | -0.34017000 | 1.25454000  | 0.07510700  |
| N                                            | -0.73583100 | 2.29835700  | -0.16473600 |
| C                                            | 0.13224500  | -0.10741200 | 0.38785500  |
| H                                            | -0.01835000 | -0.29013200 | 1.45569200  |
| O                                            | -0.54008200 | -1.08426900 | -0.37585400 |
| O                                            | -1.86602200 | -1.14377400 | 0.13591500  |
| H                                            | -2.38600800 | -0.79546200 | -0.60627100 |

## J

|                                            |  |  |             |
|--------------------------------------------|--|--|-------------|
| Sum of electronic and zero-point Energies= |  |  | -298.934562 |
|--------------------------------------------|--|--|-------------|

|                                              |            |             |             |
|----------------------------------------------|------------|-------------|-------------|
| Sum of electronic and thermal Energies=      |            |             | -298.929137 |
| Sum of electronic and thermal Enthalpies=    |            |             | -298.928193 |
| Sum of electronic and thermal Free Energies= |            |             | -298.963040 |
| C                                            | 0.00000000 | 1.23458700  | -0.30190900 |
| N                                            | 0.00000000 | 2.20453000  | -0.90635400 |
| C                                            | 0.00000000 | -1.23458700 | -0.30190900 |
| N                                            | 0.00000000 | -2.20453000 | -0.90635400 |
| C                                            | 0.00000000 | 0.00000000  | 0.48429200  |
| O                                            | 0.00000000 | 0.00000000  | 1.67576400  |

### K

|                                              |            |            |             |
|----------------------------------------------|------------|------------|-------------|
| Sum of electronic and zero-point Energies=   |            |            | -93.407486  |
| Sum of electronic and thermal Energies=      |            |            | -93.404975  |
| Sum of electronic and thermal Enthalpies=    |            |            | -93.404030  |
| Sum of electronic and thermal Free Energies= |            |            | -93.426828  |
| C                                            | 0.00000000 | 0.00000000 | -0.49398900 |
| H                                            | 0.00000000 | 0.00000000 | -1.56383400 |
| N                                            | 0.00000000 | 0.00000000 | 0.64682400  |

### L

|                                              |             |             |             |
|----------------------------------------------|-------------|-------------|-------------|
| Sum of electronic and zero-point Energies=   |             |             | -360.520423 |
| Sum of electronic and thermal Energies=      |             |             | -360.512930 |
| Sum of electronic and thermal Enthalpies=    |             |             | -360.511986 |
| Sum of electronic and thermal Free Energies= |             |             | -360.553116 |
| C                                            | -1.44158300 | 0.68705900  | -0.00039100 |
| N                                            | -1.98113200 | 1.69446900  | -0.00064700 |
| C                                            | -0.81285300 | -0.65020700 | 0.00004700  |
| O                                            | -1.50223700 | -1.62734200 | -0.00028100 |
| O                                            | 0.49546600  | -0.68339900 | 0.00063800  |
| C                                            | 1.28582800  | 0.54181800  | 0.00211800  |
| H                                            | 1.02685100  | 1.11613000  | -0.88576000 |
| H                                            | 1.03005800  | 1.11163800  | 0.89381400  |
| C                                            | 2.73118400  | 0.13353900  | -0.00158600 |
| H                                            | 2.96668600  | -0.44997900 | -0.89027000 |
| H                                            | 3.35301500  | 1.02794100  | -0.00055400 |
| H                                            | 2.97003000  | -0.45434000 | 0.88332200  |

### M

|                                              |            |            |             |
|----------------------------------------------|------------|------------|-------------|
| Sum of electronic and zero-point Energies=   |            |            | -282.420287 |
| Sum of electronic and thermal Energies=      |            |            | -282.415127 |
| Sum of electronic and thermal Enthalpies=    |            |            | -282.414183 |
| Sum of electronic and thermal Free Energies= |            |            | -282.449509 |
| C                                            | 0.00000000 | 0.63216300 | 0.00000000  |
| H                                            | 0.17033400 | 1.22972600 | 0.89358100  |



|   |             |             |             |
|---|-------------|-------------|-------------|
| H | 0.17033400  | 1.22972600  | -0.89358100 |
| C | -1.34639900 | 0.07908300  | 0.00000000  |
| N | -2.40700600 | -0.34531600 | 0.00000000  |
| O | 0.92355600  | -0.48348000 | 0.00000000  |
| O | 2.14978900  | -0.05523500 | 0.00000000  |

**N**

|                                              |             |             |             |
|----------------------------------------------|-------------|-------------|-------------|
| Sum of electronic and zero-point Energies=   |             |             | -283.050943 |
| Sum of electronic and thermal Energies=      |             |             | -283.045363 |
| Sum of electronic and thermal Enthalpies=    |             |             | -283.044419 |
| Sum of electronic and thermal Free Energies= |             |             | -283.079551 |
| C                                            | -0.04403300 | 0.60347600  | 0.00268400  |
| H                                            | 0.12371000  | 1.20168600  | 0.90079100  |
| H                                            | 0.11205500  | 1.22551500  | -0.88034000 |
| C                                            | -1.41392400 | 0.09859400  | 0.00594500  |
| N                                            | -2.48998700 | -0.28639700 | 0.00997500  |
| O                                            | 0.80422600  | -0.53162700 | -0.02443700 |
| O                                            | 2.13270700  | -0.02888800 | -0.09511800 |
| H                                            | 2.44642100  | -0.15072700 | 0.81438500  |

**O<sub>2</sub>**

|                                              |            |            |             |
|----------------------------------------------|------------|------------|-------------|
| Sum of electronic and zero-point Energies=   |            |            | -150.341418 |
| Sum of electronic and thermal Energies=      |            |            | -150.339055 |
| Sum of electronic and thermal Enthalpies=    |            |            | -150.338111 |
| Sum of electronic and thermal Free Energies= |            |            | -150.361365 |
| O                                            | 0.00000000 | 0.00000000 | 0.59729800  |
| O                                            | 0.00000000 | 0.00000000 | -0.59729800 |

**O<sub>2</sub><sup>-</sup>**

|                                              |            |            |             |
|----------------------------------------------|------------|------------|-------------|
| Sum of electronic and zero-point Energies=   |            |            | -150.470802 |
| Sum of electronic and thermal Energies=      |            |            | -150.468428 |
| Sum of electronic and thermal Enthalpies=    |            |            | -150.467484 |
| Sum of electronic and thermal Free Energies= |            |            | -150.490564 |
| O                                            | 0.00000000 | 0.00000000 | 0.66233300  |
| O                                            | 0.00000000 | 0.00000000 | -0.66233300 |

**HOO<sup>-</sup>**

|                                              |             |             |             |
|----------------------------------------------|-------------|-------------|-------------|
| Sum of electronic and zero-point Energies=   |             |             | -151.068632 |
| Sum of electronic and thermal Energies=      |             |             | -151.065729 |
| Sum of electronic and thermal Enthalpies=    |             |             | -151.064785 |
| Sum of electronic and thermal Free Energies= |             |             | -151.090357 |
| O                                            | 0.67453500  | -0.11946300 | -0.00000100 |
| H                                            | 0.96529200  | 0.79786200  | 0.00000800  |
| O                                            | -0.79519600 | 0.01973000  | 0.00000000  |

**HOO<sup>·</sup>**

|                                              |             |             |             |
|----------------------------------------------|-------------|-------------|-------------|
| Sum of electronic and zero-point Energies=   |             |             | -150.920011 |
| Sum of electronic and thermal Energies=      |             |             | -150.917158 |
| Sum of electronic and thermal Enthalpies=    |             |             | -150.916214 |
| Sum of electronic and thermal Free Energies= |             |             | -150.942161 |
| O                                            | 0.59000500  | -0.12521500 | -0.00000100 |
| H                                            | 0.97360600  | 0.77371200  | 0.00000800  |
| O                                            | -0.71170600 | 0.02850100  | 0.00000000  |

**H<sub>2</sub>O<sub>2</sub>**

|                                              |             |             |             |
|----------------------------------------------|-------------|-------------|-------------|
| Sum of electronic and zero-point Energies=   |             |             | -151.549171 |
| Sum of electronic and thermal Energies=      |             |             | -151.545970 |
| Sum of electronic and thermal Enthalpies=    |             |             | -151.545025 |
| Sum of electronic and thermal Free Energies= |             |             | -151.571429 |
| O                                            | -0.70652500 | -0.10645100 | -0.06599000 |
| H                                            | -1.01649000 | 0.59192600  | 0.52790900  |
| O                                            | 0.70652500  | 0.10645000  | -0.06598900 |
| H                                            | 1.01648800  | -0.59191600 | 0.52792400  |

**HO<sup>·</sup>**

|                                              |            |            |             |
|----------------------------------------------|------------|------------|-------------|
| Sum of electronic and zero-point Energies=   |            |            | -75.926885  |
| Sum of electronic and thermal Energies=      |            |            | -75.924524  |
| Sum of electronic and thermal Enthalpies=    |            |            | -75.923580  |
| Sum of electronic and thermal Free Energies= |            |            | -75.943132  |
| O                                            | 0.00000000 | 0.00000000 | 0.10689000  |
| H                                            | 0.00000000 | 0.00000000 | -0.85512400 |

**H<sub>2</sub>O**

|                                              |            |             |             |
|----------------------------------------------|------------|-------------|-------------|
| Sum of electronic and zero-point Energies=   |            |             | -76.421167  |
| Sum of electronic and thermal Energies=      |            |             | -76.418331  |
| Sum of electronic and thermal Enthalpies=    |            |             | -76.417387  |
| Sum of electronic and thermal Free Energies= |            |             | -76.438812  |
| O                                            | 0.00000000 | 0.00000000  | 0.11720000  |
| H                                            | 0.00000000 | 0.76373500  | -0.46880200 |
| H                                            | 0.00000000 | -0.76373500 | -0.46880200 |

**EtOH**

|                                              |            |             |             |
|----------------------------------------------|------------|-------------|-------------|
| Sum of electronic and zero-point Energies=   |            |             | -154.958297 |
| Sum of electronic and thermal Energies=      |            |             | -154.953987 |
| Sum of electronic and thermal Enthalpies=    |            |             | -154.953043 |
| Sum of electronic and thermal Free Energies= |            |             | -154.983701 |
| O                                            | 1.19658400 | -0.22245300 | 0.00000000  |
| H                                            | 1.95066100 | 0.37479900  | 0.00000000  |

|   |             |             |             |
|---|-------------|-------------|-------------|
| C | 0.00000000  | 0.54977600  | 0.00000000  |
| H | -0.03303100 | 1.19406700  | 0.88416400  |
| H | -0.03303100 | 1.19406700  | -0.88416400 |
| C | -1.17345600 | -0.39623400 | 0.00000000  |
| H | -2.10982400 | 0.16213700  | 0.00000000  |
| H | -1.15335700 | -1.03334900 | -0.88472400 |
| H | -1.15335700 | -1.03334900 | 0.88472400  |

### EtO

|                                              |             |             |             |
|----------------------------------------------|-------------|-------------|-------------|
| Sum of electronic and zero-point Energies=   |             |             | -154.302123 |
| Sum of electronic and thermal Energies=      |             |             | -154.297682 |
| Sum of electronic and thermal Enthalpies=    |             |             | -154.296738 |
| Sum of electronic and thermal Free Energies= |             |             | -154.328403 |
| O                                            | 1.29655900  | 0.09286000  | 0.00000000  |
| C                                            | 0.00000000  | 0.50762900  | 0.00000000  |
| H                                            | -0.11823100 | 1.18863200  | 0.86215900  |
| H                                            | -0.11823100 | 1.18863200  | -0.86215900 |
| C                                            | -1.03874600 | -0.59287700 | 0.00000000  |
| H                                            | -2.04364900 | -0.16922600 | 0.00000000  |
| H                                            | -0.92994300 | -1.21971700 | -0.88503300 |
| H                                            | -0.92994300 | -1.21971700 | 0.88503300  |

### H<sup>+</sup>

|                                              |            |            |            |
|----------------------------------------------|------------|------------|------------|
| Sum of electronic and zero-point Energies=   |            |            | -0.159984  |
| Sum of electronic and thermal Energies=      |            |            | -0.158567  |
| Sum of electronic and thermal Enthalpies=    |            |            | -0.157623  |
| Sum of electronic and thermal Free Energies= |            |            | -0.169983  |
| H                                            | 0.00000000 | 0.00000000 | 0.00000000 |

### H<sub>2</sub>

|                                              |            |            |             |
|----------------------------------------------|------------|------------|-------------|
| Sum of electronic and zero-point Energies=   |            |            | -1.161316   |
| Sum of electronic and thermal Energies=      |            |            | -1.158956   |
| Sum of electronic and thermal Enthalpies=    |            |            | -1.158012   |
| Sum of electronic and thermal Free Energies= |            |            | -1.172813   |
| H                                            | 0.00000000 | 0.00000000 | 0.37330900  |
| H                                            | 0.00000000 | 0.00000000 | -0.37330900 |

### TS1

|                                              |            |             |             |
|----------------------------------------------|------------|-------------|-------------|
| Sum of electronic and zero-point Energies=   |            |             | -858.482145 |
| Sum of electronic and thermal Energies=      |            |             | -858.464963 |
| Sum of electronic and thermal Enthalpies=    |            |             | -858.464019 |
| Sum of electronic and thermal Free Energies= |            |             | -858.528611 |
| N                                            | 0.50645000 | -0.66970200 | -0.15085400 |
| C                                            | 2.17149900 | -0.23498200 | 1.55546200  |

|   |             |             |             |
|---|-------------|-------------|-------------|
| H | 1.40133600  | -0.00757100 | 2.27689500  |
| C | 3.48908400  | -0.19922500 | 1.94289700  |
| H | 3.73892900  | 0.09505700  | 2.95216300  |
| C | 4.49280800  | -0.56622400 | 1.05327600  |
| H | 5.52704100  | -0.53861700 | 1.36679000  |
| C | 4.16870300  | -0.97976600 | -0.23158400 |
| H | 4.94844900  | -1.25865000 | -0.92561700 |
| C | 2.85530800  | -1.02569200 | -0.63689900 |
| H | 2.62339500  | -1.31264400 | -1.65025700 |
| C | 1.83983200  | -0.64002600 | 0.25255500  |
| C | -0.41323800 | 0.17429400  | 0.36249000  |
| H | -0.06686200 | 0.79350500  | 1.17628400  |
| C | -1.82994400 | -0.18140000 | 0.33870600  |
| C | -2.75656100 | 0.64338800  | 0.97717300  |
| H | -2.43149000 | 1.55587700  | 1.45769000  |
| C | -4.08870900 | 0.29070200  | 1.00468800  |
| H | -4.80679300 | 0.93096100  | 1.49717900  |
| C | -4.49881500 | -0.89195900 | 0.40520600  |
| H | -5.54345100 | -1.17170900 | 0.42331200  |
| C | -3.57748000 | -1.72354500 | -0.20674900 |
| H | -3.90149300 | -2.65357500 | -0.65523800 |
| C | -2.23681100 | -1.37963200 | -0.24923100 |
| C | -1.20511400 | -2.29887300 | -0.82832900 |
| H | -1.59171000 | -2.81147000 | -1.70785100 |
| H | -0.96073600 | -3.07109400 | -0.09480200 |
| C | 0.05499900  | -1.56284600 | -1.23623600 |
| H | 0.84672500  | -2.26629300 | -1.45462300 |
| H | -0.11937600 | -0.94659700 | -2.12046500 |
| C | -0.32414000 | 1.83683800  | -1.00973800 |
| H | -1.08934000 | 1.46867900  | -1.68301300 |
| C | -0.70307900 | 2.94492200  | -0.20526700 |
| C | 0.98977700  | 1.86342800  | -1.53737900 |
| N | -1.01626900 | 3.81263100  | 0.47659500  |
| N | 2.06077000  | 1.82531800  | -1.94927000 |

## TS2

|                                              |             |             |             |
|----------------------------------------------|-------------|-------------|-------------|
| Sum of electronic and zero-point Energies=   |             |             | -858.072703 |
| Sum of electronic and thermal Energies=      |             |             | -858.056606 |
| Sum of electronic and thermal Enthalpies=    |             |             | -858.055662 |
| Sum of electronic and thermal Free Energies= |             |             | -858.117346 |
| N                                            | -0.43046700 | -0.95522900 | -0.86426600 |
| N                                            | -0.51743600 | 0.60559600  | 2.58085900  |
| N                                            | -0.31759000 | 3.74899400  | -0.45482200 |
| C                                            | 3.54192400  | -1.24138800 | 0.54996800  |

|   |             |             |             |
|---|-------------|-------------|-------------|
| H | 3.88624100  | -2.18165400 | 0.96274600  |
| C | 4.41811900  | -0.17986800 | 0.43020900  |
| H | 5.44369400  | -0.28514300 | 0.75827100  |
| C | 3.98315300  | 1.01226400  | -0.12978800 |
| H | 4.66498500  | 1.84401700  | -0.24444600 |
| C | 2.67333700  | 1.13044400  | -0.55124900 |
| H | 2.33864000  | 2.05753000  | -0.99997900 |
| C | 1.78116600  | 0.07265000  | -0.40711900 |
| C | 2.21893900  | -1.13160400 | 0.13580600  |
| C | 1.28103400  | -2.30338400 | 0.21717400  |
| H | 0.75918200  | -2.31394900 | 1.17747400  |
| H | 1.84203400  | -3.23529500 | 0.14666700  |
| C | 0.26492400  | -2.22637200 | -0.90690700 |
| H | 0.76714600  | -2.32681300 | -1.87253800 |
| H | -0.46266500 | -3.02816600 | -0.83931400 |
| C | 0.34461200  | 0.28151700  | -0.83582500 |
| H | 0.34821400  | 0.75687100  | -1.82281900 |
| C | -0.44070400 | 1.24033500  | 0.08903700  |
| C | -2.17999400 | 0.58140600  | -0.71193200 |
| C | -1.75080200 | -0.79414400 | -0.61487500 |
| C | -2.62931200 | -1.76350300 | -0.13231900 |
| H | -2.33847300 | -2.80232700 | -0.08919500 |
| C | -3.85327300 | -1.37706600 | 0.37160300  |
| H | -4.51631300 | -2.12899400 | 0.77728800  |
| C | -4.24241200 | -0.02359700 | 0.40037700  |
| H | -5.20446700 | 0.24520400  | 0.81477000  |
| C | -3.44338300 | 0.93246700  | -0.15375300 |
| H | -3.77663800 | 1.95905000  | -0.22497700 |
| C | -0.45381800 | 0.91272400  | 1.47612800  |
| C | -0.34601200 | 2.63188400  | -0.18696000 |
| H | -1.89812400 | 1.11554400  | -1.61379600 |

#### **BiVO<sub>4</sub>**

|                                              |             |             |              |
|----------------------------------------------|-------------|-------------|--------------|
| Sum of electronic and zero-point Energies=   |             |             | -1459.735606 |
| Sum of electronic and thermal Energies=      |             |             | -1459.728887 |
| Sum of electronic and thermal Enthalpies=    |             |             | -1459.727943 |
| Sum of electronic and thermal Free Energies= |             |             | -1459.769153 |
| Bi                                           | -1.09323200 | 0.00000000  | 0.00000000   |
| O                                            | 0.42362200  | -0.40812400 | 1.25015800   |
| O                                            | 0.42362200  | 0.40812200  | -1.25015900  |
| V                                            | 1.78093400  | 0.00000000  | -0.00000100  |
| O                                            | 2.68742500  | 1.25556600  | 0.40636600   |
| O                                            | 2.68743100  | -1.25556200 | -0.40636400  |

**I**

|                                              |             |             |              |
|----------------------------------------------|-------------|-------------|--------------|
| Sum of electronic and zero-point Energies=   |             |             | -1093.902404 |
| Sum of electronic and thermal Energies=      |             |             | -1093.889315 |
| Sum of electronic and thermal Enthalpies=    |             |             | -1093.888371 |
| Sum of electronic and thermal Free Energies= |             |             | -1093.943356 |
| C                                            | 2.52810900  | -0.56593100 | -0.11378300  |
| C                                            | 3.32241100  | -1.66430300 | -0.44662800  |
| H                                            | 2.85697700  | -2.60005700 | -0.72598800  |
| H                                            | 5.32150000  | -2.37864300 | -0.69142600  |
| C                                            | 5.26535500  | -0.32914800 | -0.05709900  |
| H                                            | 6.34237200  | -0.23101200 | -0.03813900  |
| C                                            | 4.47738700  | 0.75808900  | 0.29406700   |
| H                                            | 4.94053300  | 1.68976400  | 0.58992100   |
| C                                            | 3.10230300  | 0.65395000  | 0.26587600   |
| C                                            | 2.18027900  | 1.75473300  | 0.69421200   |
| H                                            | 1.99489800  | 1.66430500  | 1.76796600   |
| H                                            | 2.63488300  | 2.72960900  | 0.53030100   |
| C                                            | 0.87027400  | 1.70033500  | -0.06002400  |
| H                                            | 0.13133800  | 2.35635100  | 0.38683300   |
| H                                            | 1.00571600  | 1.98318000  | -1.10498500  |
| N                                            | 0.31150900  | 0.32810400  | -0.04895800  |
| C                                            | -1.11089100 | 0.16218300  | -0.02728500  |
| C                                            | -1.90099300 | 0.96098700  | -0.83675000  |
| C                                            | -1.67500000 | -0.78876200 | 0.80475800   |
| C                                            | -3.27131600 | 0.79318100  | -0.82614400  |
| H                                            | -1.45803500 | 1.70014100  | -1.48812100  |
| C                                            | -3.04641000 | -0.95943700 | 0.81338600   |
| H                                            | -1.05561000 | -1.38041200 | 1.46421600   |
| C                                            | -3.83265000 | -0.16767000 | -0.00295000  |
| H                                            | -3.89937800 | 1.40235600  | -1.45900900  |
| H                                            | -3.49995400 | -1.69401600 | 1.46201000   |
| C                                            | 4.69449200  | -1.53973300 | -0.42612600  |
| C                                            | 1.10446800  | -0.68755100 | -0.12936500  |
| H                                            | 0.64712600  | -1.66366800 | -0.22647900  |
| Cl                                           | -5.55234300 | -0.37412800 | 0.01169100   |

**II**

|                                              |            |             |             |
|----------------------------------------------|------------|-------------|-------------|
| Sum of electronic and zero-point Energies=   |            |             | -726.504113 |
| Sum of electronic and thermal Energies=      |            |             | -726.490435 |
| Sum of electronic and thermal Enthalpies=    |            |             | -726.489491 |
| Sum of electronic and thermal Free Energies= |            |             | -726.545541 |
| C                                            | 2.37986600 | -0.56807500 | -0.11156200 |
| C                                            | 3.17561600 | -1.66640800 | -0.44415200 |
| H                                            | 2.71112800 | -2.60370600 | -0.71970000 |

|   |             |             |             |
|---|-------------|-------------|-------------|
| H | 5.17535300  | -2.37636200 | -0.69366800 |
| C | 5.11590900  | -0.32532200 | -0.06415600 |
| H | 6.19276400  | -0.22483900 | -0.04894000 |
| C | 4.32727100  | 0.76146700  | 0.28733200  |
| H | 4.78981400  | 1.69443000  | 0.57982500  |
| C | 2.95266200  | 0.65458200  | 0.26381800  |
| C | 2.02977100  | 1.75362400  | 0.69381500  |
| H | 1.84737400  | 1.66358900  | 1.76806700  |
| H | 2.48176700  | 2.72929700  | 0.52778500  |
| C | 0.71825200  | 1.69617500  | -0.05735800 |
| H | -0.01986800 | 2.35258300  | 0.39033800  |
| H | 0.85120900  | 1.97609500  | -1.10334200 |
| N | 0.16272000  | 0.32212500  | -0.04030500 |
| C | -1.25780800 | 0.15125700  | -0.02239200 |
| C | -2.04680600 | 0.96519300  | -0.81879200 |
| C | -1.81592200 | -0.81769600 | 0.79416700  |
| C | -3.41453800 | 0.79347900  | -0.81131600 |
| H | -1.60329200 | 1.71616100  | -1.45532400 |
| C | -3.18455800 | -0.99184700 | 0.79877300  |
| H | -1.19325500 | -1.41670900 | 1.44316000  |
| C | -3.98383600 | -0.18684900 | -0.00455600 |
| H | -4.04092500 | 1.41440400  | -1.43457500 |
| H | -3.63269200 | -1.74087900 | 1.43472800  |
| C | 4.54696500  | -1.53852200 | -0.42848800 |
| C | 0.95883600  | -0.69324100 | -0.12171500 |
| H | 0.50403400  | -1.67075200 | -0.21693500 |
| C | -5.40411900 | -0.36229500 | 0.00378200  |
| N | -6.54111400 | -0.50304700 | 0.00964500  |

## 7. Characterization Data

### 2-phenyl-1,2,3,4-tetrahydroisoquinoline-1-carbonitrile (3a)<sup>11</sup>

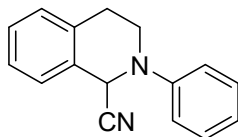

White solid (10.8 mg, 23 %). mp. 96-97 °C (lit.<sup>11</sup> 95-96 °C). TLC (PE : EA, 10:1 v/v):  $R_f = 0.38$ . <sup>1</sup>H NMR (400 MHz, CDCl<sub>3</sub>):  $\delta$  7.40-7.20 (m, 6H), 7.12-7.05 (m, 2H), 7.01 (t,  $J = 7.3$  Hz, 1H), 5.51 (s, 1H), 3.82-3.71 (m, 1H), 3.53-3.42 (m, 1H), 3.21-3.09 (m, 1H), 2.96 (dt,  $J = 16.3, 3.4$  Hz, 1H). <sup>13</sup>C NMR (100 MHz, CDCl<sub>3</sub>):  $\delta$  148.4, 134.7, 129.7, 129.6, 129.4, 128.8, 127.1, 126.9, 121.9, 117.8, 117.6, 53.2, 44.2, 28.6.

### 5,12a-dihydroindolo[2,1-a]isoquinoline-12,12(6H)-dicarbonitrile (4a)

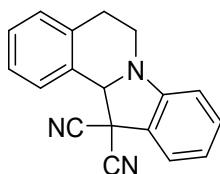

White solid (39.2 mg, 72 %). mp. 125-126 °C. TLC (PE : EA, 10:1 v/v):  $R_f = 0.28$ . <sup>1</sup>H NMR (400 MHz, CDCl<sub>3</sub>):  $\delta$  7.66-7.45 (m, 2H), 7.40-7.21 (m, 4H), 6.92 (t,  $J = 7.5$  Hz, 1H), 6.75 (d,  $J = 7.8$  Hz, 1H), 5.19 (s, 1H), 3.91-3.76 (m, 1H), 3.27-3.10 (m, 2H), 2.94-2.82 (m, 1H). <sup>13</sup>C NMR (100 MHz, CDCl<sub>3</sub>):  $\delta$  149.5, 135.6, 132.2, 129.7, 129.6, 128.9, 127.2, 125.6, 124.9, 122.0, 120.5, 115.1, 112.2, 109.6, 72.0, 42.6, 42.5, 28.7. HRMS (ESI), calcd. for C<sub>18</sub>H<sub>14</sub>N<sub>3</sub> (M+H)<sup>+</sup>: 272.1182, found: 272.1183.

### 2-(4-(tert-butyl)phenyl)-1,2,3,4-tetrahydroisoquinoline-1-carbonitrile (3b)<sup>12</sup>

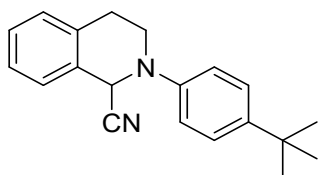

Yellow oil (10.5 mg, 18 %). TLC (PE : EA, 10:1 v/v):  $R_f = 0.43$ . <sup>1</sup>H NMR (400 MHz, CDCl<sub>3</sub>):  $\delta$  7.41-7.35 (m, 2H), 7.34-7.21 (m, 4H), 7.07-7.01 (m, 2H), 5.48 (s, 1H), 3.74 (dddd,  $J = 12.4, 6.0, 2.6, 1.1$  Hz, 1H), 3.47 (ddd,  $J = 12.4, 11.0, 4.0$  Hz, 1H), 3.21-3.10 (m, 1H), 2.95 (dt,  $J = 16.4, 3.3$  Hz, 1H), 1.32 (s, 9H). <sup>13</sup>C NMR (100 MHz, CDCl<sub>3</sub>):  $\delta$  146.0, 144.9, 134.6, 129.7, 129.4, 128.7, 127.1, 126.8, 126.4, 117.9, 117.6, 53.7, 44.3, 34.2, 31.4, 28.6.

### 10-(tert-butyl)-5,12a-dihydroindolo[2,1-a]isoquinoline-12,12(6H)-dicarbonitrile (4b)



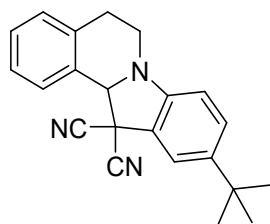

White solid (43.3 mg, 66 %). mp. 145-146 °C. TLC (PE : EA, 10:1 v/v):  $R_f = 0.32$ .  $^1\text{H NMR}$  (400 MHz,  $\text{CDCl}_3$ ):  $\delta$  7.62-7.57 (m, 1H), 7.52 (d,  $J = 1.8$  Hz, 1H), 7.43-7.32 (m, 3H), 7.28-7.24 (m, 1H), 6.73 (d,  $J = 8.3$  Hz, 1H), 5.19 (s, 1H), 3.86-3.75 (m, 1H), 3.26-3.11 (m, 2H), 2.95-2.84 (m, 1H), 1.33 (s, 9H).  $^{13}\text{C NMR}$  (100 MHz,  $\text{CDCl}_3$ ):  $\delta$  147.5, 144.6, 135.7, 129.9, 129.6, 129.2, 128.9, 127.2, 125.6, 122.0, 121.6, 115.3, 112.5, 109.8, 72.3, 43.1, 42.9, 34.6, 31.5, 28.8. **HRMS** (ESI), calcd. for  $\text{C}_{22}\text{H}_{22}\text{N}_3$  ( $\text{M}+\text{H}$ ) $^+$ : 328.1808, found: 328.1812.

### 2-(4-ethylphenyl)-1,2,3,4-tetrahydroisoquinoline-1-carbonitrile (3c)<sup>13</sup>

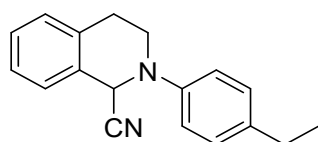

White solid (6.9 mg, 13 %). mp. 133-134 °C (lit.<sup>13</sup> 133-134 °C). TLC (PE : EA, 10:1 v/v):  $R_f = 0.38$ .  $^1\text{H NMR}$  (400 MHz,  $\text{CDCl}_3$ ):  $\delta$  7.33-7.25 (m, 3H), 7.24-7.16 (m, 3H), 7.06-7.00 (m, 2H), 5.46 (s, 1H), 3.75-3.67 (m, 1H), 3.45 (ddd,  $J = 12.1, 11.0, 4.0$  Hz, 1H), 3.21-3.10 (m, 1H), 2.94 (dt,  $J = 16.4, 3.3$  Hz, 1H), 2.62 (q,  $J = 7.6$  Hz, 2H), 1.23 (t,  $J = 7.6$  Hz, 3H).  $^{13}\text{C NMR}$  (100 MHz,  $\text{CDCl}_3$ ):  $\delta$  146.4, 138.2, 134.6, 129.7, 129.4, 128.9, 128.7, 127.1, 126.8, 118.3, 117.8, 54.0, 44.4, 28.6, 28.0, 15.7.

### 10-ethyl-5,12a-dihydroindolo[2,1-a]isoquinoline-12,12(6H)-dicarbonitrile (4c)

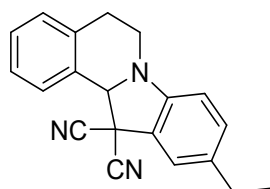

White solid (36.6 mg, 61 %). mp. 105-106 °C. TLC (PE : EA, 10:1 v/v):  $R_f = 0.30$ .  $^1\text{H NMR}$  (400 MHz,  $\text{CDCl}_3$ ):  $\delta$  7.62-7.56 (m, 1H), 7.40-7.31 (m, 3H), 7.28-7.23 (m, 1H), 7.20 (dd,  $J = 8.2, 1.5$  Hz, 1H), 6.72 (d,  $J = 8.2$  Hz, 1H), 5.18 (s, 1H), 3.85-3.74 (m, 1H), 3.26-3.10 (m, 2H), 2.95-2.84 (m, 1H), 2.64 (q,  $J = 7.6$  Hz, 2H), 1.24 (t,  $J = 7.6$  Hz, 3H).  $^{13}\text{C NMR}$  (100 MHz,  $\text{CDCl}_3$ ):  $\delta$  147.9, 137.4, 135.7, 131.6, 129.9, 129.6, 128.9, 127.2, 125.6, 124.1, 122.3, 115.2, 112.4, 110.1, 72.3, 43.2, 42.7, 28.8, 28.3, 15.8. **HRMS** (ESI), calcd. for  $\text{C}_{20}\text{H}_{18}\text{N}_3$  ( $\text{M}+\text{H}$ ) $^+$ : 300.1495, found: 300.1497.

### 2-(p-tolyl)-1,2,3,4-tetrahydroisoquinoline-1-carbonitrile (3d)<sup>11</sup>

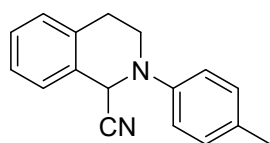

White solid (6.0 mg, 12 %). mp. 96-97 °C (lit.<sup>11</sup> 94-96 °C). TLC (PE : EA, 10:1 v/v):  $R_f = 0.42$ . **<sup>1</sup>H NMR** (400 MHz, CDCl<sub>3</sub>):  $\delta$  7.33-7.20 (m, 4H), 7.16 (d,  $J = 8.4$  Hz, 2H), 7.00 (d,  $J = 8.4$  Hz, 2H), 5.45 (s, 1H), 3.75-3.65 (m, 1H), 3.44 (td,  $J = 11.5, 4.0$  Hz, 1H), 3.22-3.10 (m, 1H), 2.94 (dt,  $J = 16.3, 3.1$  Hz, 1H), 2.31 (s, 3H). **<sup>13</sup>C NMR** (100 MHz, CDCl<sub>3</sub>):  $\delta$  146.3, 134.5, 131.8, 130.1, 129.6, 129.4, 128.7, 127.1, 126.8, 118.3, 117.7, 54.1, 44.4, 28.6, 20.6.

#### 10-methyl-5,12a-dihydroindolo[2,1-*a*]isoquinoline-12,12(6*H*)-dicarbonitrile (4d)

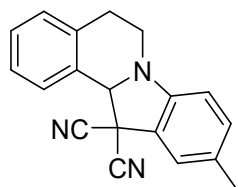

White solid (38.8 mg, 68 %). mp. 135-136 °C. TLC (PE : EA, 10:1 v/v):  $R_f = 0.32$ . **<sup>1</sup>H NMR** (400 MHz, CDCl<sub>3</sub>):  $\delta$  7.62-7.55 (m, 1H), 7.40-7.31 (m, 3H), 7.27-7.23 (m, 1H), 7.20-7.14 (m, 1H), 6.79 (d,  $J = 8.3$  Hz, 1H), 5.17 (s, 1H), 3.83-3.72 (m, 1H), 3.24-3.10 (m, 2H), 2.94-2.84 (m, 1H), 2.34 (s, 3H). **<sup>13</sup>C NMR** (100 MHz, CDCl<sub>3</sub>):  $\delta$  147.7, 135.7, 132.7, 130.8, 129.9, 129.6, 128.9, 127.2, 125.6, 125.3, 122.4, 115.2, 112.4, 110.1, 72.3, 43.3, 42.7, 28.8, 20.8. **HRMS** (ESI), calcd. for C<sub>19</sub>H<sub>16</sub>N<sub>3</sub> (M+H)<sup>+</sup>: 286.1339, found: 286.1338.

#### 2-(4-fluorophenyl)-1,2,3,4-tetrahydroisoquinoline-1-carbonitrile (3e)<sup>13</sup>

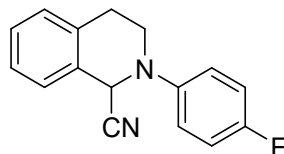

White solid (9.6 mg, 19 %). mp. 125-126 °C (lit.<sup>13</sup> 124-125 °C). TLC (PE : EA, 10:1 v/v):  $R_f = 0.30$ . **<sup>1</sup>H NMR** (400 MHz, CDCl<sub>3</sub>):  $\delta$  7.35-7.21 (m, 4H), 7.10-7.03 (m, 4H), 5.40 (s, 1H), 3.63 (dddd,  $J = 12.2, 6.1, 2.4, 1.2$  Hz, 1H), 3.45 (td,  $J = 11.6, 4.0$  Hz, 1H), 3.22-3.11 (m, 1H), 2.95 (dt,  $J = 16.4, 2.9$  Hz, 1H). **<sup>13</sup>C NMR** (100 MHz, CDCl<sub>3</sub>):  $\delta$  158.6 (d,  $J = 242.1$  Hz), 145.1 (d,  $J = 2.9$  Hz), 134.3, 129.5, 129.4, 128.8, 127.1, 126.8, 120.5 (d,  $J = 8.1$  Hz), 117.4, 116.2 (d,  $J = 22.7$  Hz), 54.8, 44.8, 28.6. **<sup>19</sup>F NMR** (376 MHz, CDCl<sub>3</sub>):  $\delta$  -120.7.

#### 10-fluoro-5,12a-dihydroindolo[2,1-*a*]isoquinoline-12,12(6*H*)-dicarbonitrile (4e)

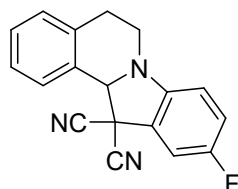

White solid (44.5 mg, 77 %). mp. 140-141 °C. TLC (PE : EA, 10:1 v/v):  $R_f = 0.24$ . **<sup>1</sup>H NMR** (400 MHz, CDCl<sub>3</sub>):  $\delta$  7.63-7.52 (m, 1H), 7.44-7.20 (m, 4H), 7.11 (td,  $J = 8.7, 2.4$  Hz, 1H), 6.74 (dd,  $J = 8.7, 4.0$  Hz, 1H), 5.23 (s, 1H), 3.82-3.70 (m, 1H), 3.28-3.10 (m, 2H), 2.98-2.86 (m, 1H). **<sup>13</sup>C NMR** (100 MHz, CDCl<sub>3</sub>):  $\delta$  157.2 (d,  $J = 242.1$  Hz), 146.4 (d,  $J = 1.5$  Hz), 135.5, 129.6, 129.4, 129.1, 127.3, 125.6, 123.1 (d,  $J = 8.8$  Hz), 119.1 (d,  $J = 23.5$  Hz), 114.6, 112.5 (d,  $J = 25.7$  Hz), 111.8, 111.0 (d,  $J = 8.1$  Hz), 72.5,

43.4, 42.7, 28.7.  $^{19}\text{F}$  NMR (376 MHz,  $\text{CDCl}_3$ ):  $\delta$  -121.3. HRMS (ESI), calcd. for  $\text{C}_{18}\text{H}_{13}\text{FN}_3$  ( $\text{M}+\text{H}$ ) $^+$ : 290.1088, found: 290.1086.

**2-(4-chlorophenyl)-1,2,3,4-tetrahydroisoquinoline-1-carbonitrile (3f)<sup>13</sup>**

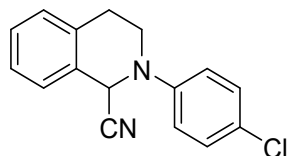

White solid (12.5 mg, 23 %). mp. 152-153 °C (lit.<sup>13</sup> 152-153 °C). TLC (PE : EA, 10:1 v/v):  $R_f$  = 0.35.  $^1\text{H}$  NMR (400 MHz,  $\text{CDCl}_3$ ):  $\delta$  7.36-7.28 (m, 5H), 7.25-7.23 (m, 1H), 7.05-6.98 (m, 2H), 5.46 (s, 1H), 3.72 (dddd,  $J$  = 12.2, 5.9, 3.1, 1.0 Hz, 1H), 3.47 (ddd,  $J$  = 12.3, 10.6, 4.1 Hz, 1H), 3.22-3.10 (m, 1H), 2.98 (dt,  $J$  = 16.4, 3.6 Hz, 1H).  $^{13}\text{C}$  NMR (100 MHz,  $\text{CDCl}_3$ ):  $\delta$  147.0, 134.4, 129.5, 129.4, 129.2, 128.9, 127.1, 127.1, 127.0, 118.9, 117.5, 53.2, 44.3, 28.4.

**10-chloro-5,12a-dihydroindolo[2,1-*a*]isoquinoline-12,12(6*H*)-dicarbonitrile (4f)**

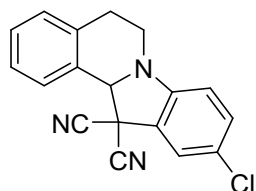

White solid (48.2 mg, 77 %). mp. 152-153 °C. TLC (PE : EA, 10:1 v/v):  $R_f$  = 0.26.  $^1\text{H}$  NMR (400 MHz,  $\text{CDCl}_3$ ):  $\delta$  7.61-7.45 (m, 2H), 7.43-7.24 (m, 4H), 6.69 (d,  $J$  = 8.6 Hz, 1H), 5.24 (s, 1H), 3.88-3.75 (m, 1H), 3.28-3.11 (m, 2H), 2.95-2.84 (m, 1H).  $^{13}\text{C}$  NMR (100 MHz,  $\text{CDCl}_3$ ):  $\delta$  148.1, 135.4, 132.3, 129.7, 129.3, 129.1, 127.4, 125.6, 125.1, 125.0, 123.1, 114.4, 111.6, 110.4, 72.1, 42.6, 42.5, 28.6. HRMS (ESI), calcd. for  $\text{C}_{18}\text{H}_{13}\text{ClN}_3$  ( $\text{M}+\text{H}$ ) $^+$ : 306.0793, found: 306.0791.

**2-(4-bromophenyl)-1,2,3,4-tetrahydroisoquinoline-1-carbonitrile (3g)<sup>13</sup>**

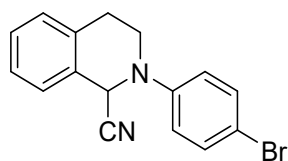

White solid (15.2 mg, 24 %). mp. 156-157 °C (lit.<sup>13</sup> 155-156 °C). TLC (PE : EA, 10:1 v/v):  $R_f$  = 0.36.  $^1\text{H}$  NMR (400 MHz,  $\text{CDCl}_3$ ):  $\delta$  7.49-7.42 (m, 2H), 7.35-7.26 (m, 3H), 7.26-7.22 (m, 1H), 6.98-6.91 (m, 2H), 5.46 (s, 1H), 3.72 (dddd,  $J$  = 12.3, 5.8, 3.2, 1.0 Hz, 1H), 3.46 (ddd,  $J$  = 12.3, 10.5, 4.2 Hz, 1H), 3.20-3.10 (m, 1H), 2.98 (dt,  $J$  = 16.4, 3.6 Hz, 1H).  $^{13}\text{C}$  NMR (100 MHz,  $\text{CDCl}_3$ ):  $\delta$  147.4, 134.4, 132.4, 129.4, 129.2, 128.9, 127.1, 127.0, 119.1, 117.5, 114.4, 52.9, 44.2, 28.4.

**10-bromo-5,12a-dihydroindolo[2,1-*a*]isoquinoline-12,12(6*H*)-dicarbonitrile (4g)**

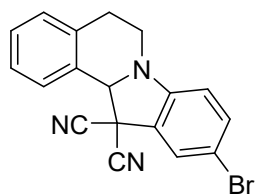

White solid (52.0 mg, 74 %). mp. 161-162 °C. TLC (PE : EA, 10:1 v/v):  $R_f = 0.24$ .  $^1\text{H NMR}$  (400 MHz,  $\text{CDCl}_3$ ):  $\delta$  7.66-7.26 (m, 6H), 6.64 (d,  $J = 8.4$  Hz, 1H), 5.24 (s, 1H), 3.94-3.69 (m, 1H), 3.28-3.11 (m, 2H), 2.97-2.80 (m, 1H).  $^{13}\text{C NMR}$  (100 MHz,  $\text{CDCl}_3$ ):  $\delta$  148.5, 135.4, 135.1, 129.7, 129.2, 129.1, 127.9, 127.4, 125.6, 123.4, 114.4, 111.6, 111.5, 110.8, 72.0, 42.4, 42.4, 28.6. **HRMS** (ESI), calcd. for  $\text{C}_{18}\text{H}_{13}\text{BrN}_3$  ( $\text{M}+\text{H}$ ) $^+$ : 350.0287, found: 350.0291.

### 2-(4-(trifluoromethyl)phenyl)-1,2,3,4-tetrahydroisoquinoline-1-carbonitrile (3h)<sup>13</sup>

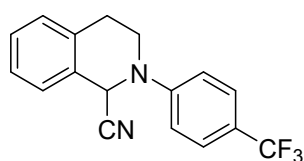

White solid (44.2 mg, 73 %). mp. 101-102 °C (lit.<sup>13</sup> 102-103 °C). TLC (PE : EA, 10:1 v/v):  $R_f = 0.30$ .  $^1\text{H NMR}$  (400 MHz,  $\text{CDCl}_3$ ):  $\delta$  7.60 (d,  $J = 8.8$  Hz, 2H), 7.38-7.26 (m, 4H), 7.09 (d,  $J = 8.7$  Hz, 2H), 5.58 (s, 1H), 3.86 (dt,  $J = 12.2, 5.0$  Hz, 1H), 3.61-3.52 (m, 1H), 3.22-3.11 (m, 1H), 3.05 (dt,  $J = 16.3, 4.4$  Hz, 1H).  $^{13}\text{C NMR}$  (100 MHz,  $\text{CDCl}_3$ ):  $\delta$  150.3, 134.6, 129.2, 129.1, 129.0, 127.2, 127.0, 126.9 (q,  $J = 3.7$  Hz), 124.4 (q,  $J = 271.4$  Hz), 122.6 (q,  $J = 33.0$  Hz), 117.5, 115.4, 51.2, 43.9, 28.3.  $^{19}\text{F NMR}$  (376 MHz,  $\text{CDCl}_3$ ):  $\delta$  -61.6.

### 10-(trifluoromethyl)-5,12a-dihydroindolo[2,1-a]isoquinoline-12,12(6H)-dicarbonitrile (4h)

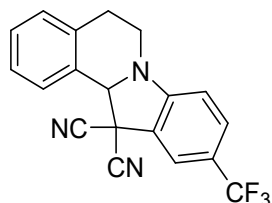

White solid (13.6 mg, 20 %). mp. 157-158 °C. TLC (PE : EA, 10:1 v/v):  $R_f = 0.16$ .  $^1\text{H NMR}$  (400 MHz,  $\text{CDCl}_3$ ):  $\delta$  7.74 (s, 1H), 7.65-7.55 (m, 2H), 7.44-7.35 (m, 2H), 7.32-7.27 (m, 1H), 6.77 (d,  $J = 8.4$  Hz, 1H), 5.37 (s, 1H), 3.98-3.90 (ddd,  $J = 12.4, 6.0, 2.2$  Hz, 1H), 3.35-3.15 (m, 2H), 2.95-2.87 (m, 1H).  $^{13}\text{C NMR}$  (100 MHz,  $\text{CDCl}_3$ ):  $\delta$  151.4, 135.2, 130.1 (q,  $J = 3.7$  Hz), 129.8, 129.3, 129.0, 127.6, 125.6, 123.9 (d,  $J = 271.4$  Hz), 122.5 (q,  $J = 3.7$  Hz), 122.0 (d,  $J = 33.8$  Hz), 121.7, 114.2, 111.4, 108.4, 71.6, 42.5, 41.7, 28.7.  $^{19}\text{F NMR}$  (376 MHz,  $\text{CDCl}_3$ ):  $\delta$  -61.3. **HRMS** (ESI), calcd. for  $\text{C}_{19}\text{H}_{12}\text{F}_3\text{N}_3$  ( $\text{M}+\text{H}$ ) $^+$ : 340.1056, found: 340.1058.

### 2-(4-cyanophenyl)-1,2,3,4-tetrahydroisoquinoline-1-carbonitrile (3i)<sup>13</sup>

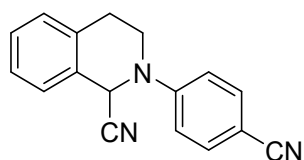

White solid (20.2 mg, 39 %). mp. 153-154 °C (lit.<sup>13</sup> 155-156 °C). TLC (PE : EA, 5:1 v/v):  $R_f = 0.26$ . **<sup>1</sup>H NMR** (400 MHz, CDCl<sub>3</sub>):  $\delta$  7.63 (d,  $J = 8.9$  Hz, 2H), 7.41-7.27 (m, 4H), 7.03 (d,  $J = 8.9$  Hz, 2H), 5.59 (s, 1H), 3.90-3.80 (m, 1H), 3.67-3.57 (m, 1H), 3.21-3.06 (m, 2H). **<sup>13</sup>C NMR** (100 MHz, CDCl<sub>3</sub>):  $\delta$  150.6, 134.7, 133.9, 129.4, 129.1, 128.8, 127.4, 127.0, 119.4, 117.3, 114.7, 102.7, 50.1, 43.8, 28.2.

**2-(3-methoxyphenyl)-1,2,3,4-tetrahydroisoquinoline-1-carbonitrile (3j)<sup>12</sup>**

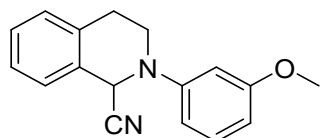

Yellow oil (8.1 mg, 15 %). TLC (PE : EA, 10:1 v/v):  $R_f = 0.26$ . **<sup>1</sup>H NMR** (400 MHz, CDCl<sub>3</sub>):  $\delta$  7.34-7.21 (m, 5H), 6.68 (dd,  $J = 8.1, 2.2$  Hz, 1H), 6.61 (t,  $J = 2.3$  Hz, 1H), 6.56 (dd,  $J = 8.2, 2.1$  Hz, 1H), 5.51 (s, 1H), 3.82 (s, 3H), 3.77 (dddd,  $J = 12.4, 5.8, 3.1, 0.9$  Hz, 1H), 3.47 (ddd,  $J = 12.5, 10.6, 4.2$  Hz, 1H), 3.20-3.09 (m, 1H), 2.96 (dt,  $J = 16.4, 3.6$  Hz, 1H). **<sup>13</sup>C NMR** (100 MHz, CDCl<sub>3</sub>):  $\delta$  160.8, 149.7, 134.6, 130.3, 129.5, 129.3, 128.8, 127.1, 126.9, 117.7, 109.9, 106.5, 104.0, 55.3, 52.9, 44.1, 28.5.

**11-methoxy-5,12a-dihydroindolo[2,1-*a*]isoquinoline-12,12(6*H*)-dicarbonitrile (4j1)**

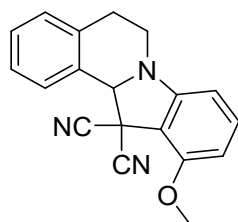

White solid (35.1 mg, 58 %). mp. 129-130 °C. TLC (PE : EA, 10:1 v/v):  $R_f = 0.17$ . **<sup>1</sup>H NMR** (400 MHz, CDCl<sub>3</sub>):  $\delta$  7.63-7.59 (m, 1H), 7.41-7.28 (m, 3H), 7.25-7.23 (m, 1H), 6.40 (dd,  $J = 18.7, 8.3$  Hz, 2H), 5.34 (s, 1H), 3.96 (s, 3H), 3.81 (ddd,  $J = 12.4, 5.6, 2.6$  Hz, 1H), 3.25 (td,  $J = 11.3, 3.7$  Hz, 1H), 3.17-3.07 (m, 1H), 2.85 (dt,  $J = 15.5, 2.5$  Hz, 1H). **<sup>13</sup>C NMR** (100 MHz, CDCl<sub>3</sub>):  $\delta$  157.0, 151.5, 135.7, 133.8, 130.0, 129.5, 128.9, 127.3, 125.9, 114.9, 111.9, 107.6, 102.9, 102.5, 72.2, 56.0, 43.1, 40.8, 28.9. **HRMS** (ESI), calcd. for C<sub>19</sub>H<sub>16</sub>N<sub>3</sub>O (M+H)<sup>+</sup>: 302.1288, found: 302.1293.

**9-methoxy-5,12a-dihydroindolo[2,1-*a*]isoquinoline-12,12(6*H*)-dicarbonitrile (4j2)**

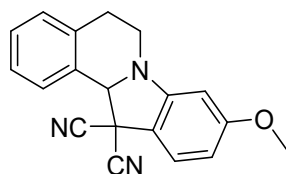

White solid (10.9 mg, 18 %). mp. 135-136 °C. TLC (PE : EA, 10:1 v/v):  $R_f = 0.12$ . **<sup>1</sup>H NMR** (400 MHz, CDCl<sub>3</sub>):  $\delta$  7.60-7.55 (m, 1H), 7.41-7.32 (m, 3H), 7.28-7.24 (m, 1H), 6.44 (dd,  $J = 8.4, 2.2$  Hz, 1H), 6.28 (d,  $J = 2.2$  Hz, 1H), 5.22 (s, 1H), 3.86-3.80 (m, 4H), 3.26-3.13 (m, 2H), 2.94-2.84 (m, 1H). **<sup>13</sup>C NMR** (100 MHz, CDCl<sub>3</sub>):  $\delta$  163.4, 150.9, 135.5, 129.8, 129.6, 128.9, 127.2, 125.7, 125.5, 115.2, 113.9, 112.4, 105.4, 96.2, 72.4, 55.7, 42.4, 42.2, 28.8. **HRMS** (ESI), calcd. for C<sub>19</sub>H<sub>16</sub>N<sub>3</sub>O (M+H)<sup>+</sup>: 302.1288, found: 302.1291.

### 2-(3-bromophenyl)-1,2,3,4-tetrahydroisoquinoline-1-carbonitrile (3k)<sup>14</sup>

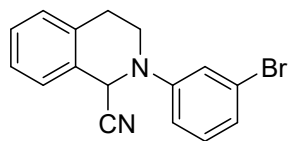

White solid (13.8 mg, 22 %). mp. 93-94 °C (lit.<sup>14</sup> 92-93 °C). TLC (PE : EA, 10:1 v/v):  $R_f$  = 0.31. <sup>1</sup>H NMR (400 MHz, CDCl<sub>3</sub>):  $\delta$  7.36-7.27 (m, 3H), 7.25-7.17 (m, 3H), 7.12 (d,  $J$  = 7.8 Hz, 1H), 6.98 (dd,  $J$  = 8.2, 2.1 Hz, 1H), 5.49 (s, 1H), 3.80-3.72 (m, 1H), 3.54-3.44 (m, 1H), 3.20-3.09 (m, 1H), 3.00 (dt,  $J$  = 16.3, 3.8 Hz, 1H). <sup>13</sup>C NMR (100 MHz, CDCl<sub>3</sub>):  $\delta$  149.5, 134.5, 130.8, 129.3, 129.1, 129.0, 127.0, 127.0, 124.4, 123.5, 120.1, 117.5, 115.4, 52.4, 44.1, 28.4.

### 11-bromo-5,12a-dihydroindolo[2,1-*a*]isoquinoline-12,12(6*H*)-dicarbonitrile (4k1)

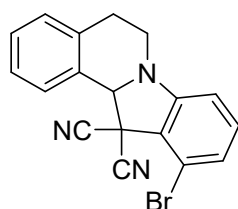

White solid (26.0 mg, 37 %). mp. 183-184 °C. TLC (PE : EA, 10:1 v/v):  $R_f$  = 0.12. <sup>1</sup>H NMR (400 MHz, CDCl<sub>3</sub>):  $\delta$  7.66-7.61 (m, 1H), 7.44-7.35 (m, 2H), 7.30-7.27 (m, 1H), 7.22 (t,  $J$  = 8.0 Hz, 1H), 7.01 (d,  $J$  = 7.8 Hz, 1H), 6.68 (d,  $J$  = 8.1 Hz, 1H), 5.44 (s, 1H), 3.82 (ddd,  $J$  = 12.5, 5.8, 2.3 Hz, 1H), 3.29 (td,  $J$  = 11.5, 3.7 Hz, 1H), 3.18-3.08 (m, 1H), 2.92-2.83 (m, 1H). <sup>13</sup>C NMR (100 MHz, CDCl<sub>3</sub>):  $\delta$  151.3, 135.5, 133.6, 129.7, 129.3, 129.2, 127.5, 125.9, 123.6, 120.7, 120.4, 114.2, 110.7, 108.3, 71.5, 44.7, 42.8, 28.8. HRMS (ESI), calcd. for C<sub>18</sub>H<sub>13</sub>BrN<sub>3</sub> (M+H)<sup>+</sup>: 350.0287, found: 350.0284.

### 9-bromo-5,12a-dihydroindolo[2,1-*a*]isoquinoline-12,12(6*H*)-dicarbonitrile (4k2)

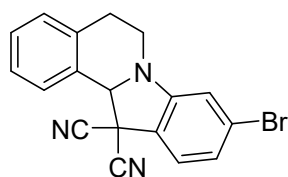

White solid (10.6 mg, 15 %). mp. 84-85 °C. TLC (PE : EA, 10:1 v/v):  $R_f$  = 0.28. <sup>1</sup>H NMR (400 MHz, CDCl<sub>3</sub>):  $\delta$  7.58-7.53 (m, 1H), 7.42-7.34 (m, 3H), 7.32-7.27 (m, 1H), 7.04 (dd,  $J$  = 8.1, 1.7 Hz, 1H), 6.90 (d,  $J$  = 1.6 Hz, 1H), 5.27 (s, 1H), 3.88-3.81 (m, 1H), 3.29-3.14 (m, 2H), 2.93-2.86 (m, 1H). <sup>13</sup>C NMR (100 MHz, CDCl<sub>3</sub>):  $\delta$  150.3, 135.3, 129.7, 129.2, 129.1, 127.4, 126.6, 126.0, 125.5, 123.1, 120.7, 114.5, 112.6, 111.6, 71.9, 42.3, 42.1, 28.7. HRMS (ESI), calcd. for C<sub>18</sub>H<sub>13</sub>BrN<sub>3</sub> (M+H)<sup>+</sup>: 350.0287, found: 350.0286.

### 2-(3-(trifluoromethyl)phenyl)-1,2,3,4-tetrahydroisoquinoline-1-carbonitrile (3l)<sup>14</sup>

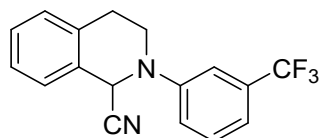

White solid (46.1 mg, 76 %). mp. 101-102 °C (lit.<sup>14</sup> 100-101 °C). TLC (PE : EA, 10:1 v/v):  $R_f$  = 0.34. **<sup>1</sup>H NMR** (400 MHz, CDCl<sub>3</sub>):  $\delta$  7.47 (t,  $J$  = 8.0 Hz, 1H), 7.37-7.29 (m, 3H), 7.29-7.21 (m, 4H), 5.54 (s, 1H), 3.81 (dddd,  $J$  = 12.4, 5.6, 3.7, 1.0 Hz, 1H), 3.54 (ddd,  $J$  = 12.4, 10.3, 4.2 Hz, 1H), 3.23-3.12 (m, 1H), 3.03 (dt,  $J$  = 16.4, 3.9 Hz, 1H). **<sup>13</sup>C NMR** (100 MHz, CDCl<sub>3</sub>):  $\delta$  148.5, 134.4, 132.0 (q,  $J$  = 32.3 Hz), 130.2, 129.3, 129.0, 127.1, 127.0, 124.0 (d,  $J$  = 272.2 Hz), 119.8, 118.0 (q,  $J$  = 3.7 Hz), 117.4, 113.6 (q,  $J$  = 3.7 Hz), 52.4, 44.1, 28.4. **<sup>19</sup>F NMR** (376 MHz, CDCl<sub>3</sub>):  $\delta$  -62.7.

### 2-(2-chlorophenyl)-1,2,3,4-tetrahydroisoquinoline-1-carbonitrile (3m)<sup>13</sup>

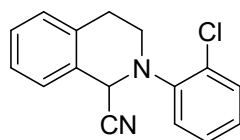

White solid (28.6 mg, 53 %). mp. 115-116 °C (lit.<sup>13</sup> 115-116 °C). TLC (PE : EA, 10:1 v/v):  $R_f$  = 0.40. **<sup>1</sup>H NMR** (400 MHz, CDCl<sub>3</sub>):  $\delta$  7.45-7.40 (m, 1H), 7.38-7.20 (m, 6H), 7.17-7.11 (m, 1H), 5.53 (s, 1H), 3.62 (td,  $J$  = 12.0, 3.8 Hz, 1H), 3.50-3.41 (m, 1H), 3.31-3.20 (m, 1H), 2.92 (dt,  $J$  = 16.5, 2.7 Hz, 1H). **<sup>13</sup>C NMR** (100 MHz, CDCl<sub>3</sub>):  $\delta$  145.8, 134.1, 130.6, 129.6, 129.5, 129.4, 128.7, 128.2, 127.1, 126.7, 126.0, 123.2, 117.3, 53.8, 45.6, 28.8.

### 2,7-diphenyl-1,2,3,4-tetrahydroisoquinoline-1-carbonitrile (3n)

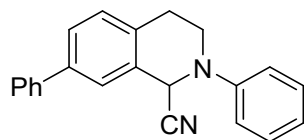

White solid (17.2 mg, 28 %). mp. 133-134 °C. TLC (PE : EA, 10:1 v/v):  $R_f$  = 0.36. **<sup>1</sup>H NMR** (400 MHz, CDCl<sub>3</sub>):  $\delta$  7.61-7.50 (m, 4H), 7.45 (t,  $J$  = 7.2 Hz, 2H), 7.41-7.34 (m, 3H), 7.31 (d,  $J$  = 8.0 Hz, 1H), 7.11 (d,  $J$  = 8.0 Hz, 2H), 7.03 (t,  $J$  = 7.3 Hz, 1H), 5.58 (s, 1H), 3.81 (dddd,  $J$  = 12.5, 6.0, 2.8, 1.0 Hz, 1H), 3.52 (ddd,  $J$  = 12.4, 10.8, 4.0 Hz, 1H), 3.25-3.14 (m, 1H), 3.01 (dt,  $J$  = 16.5, 3.4 Hz, 1H). **<sup>13</sup>C NMR** (100 MHz, CDCl<sub>3</sub>):  $\delta$  148.4, 140.1, 133.6, 130.0, 129.8, 129.6, 128.9, 127.6, 127.6, 127.0, 125.6, 122.0, 117.8, 53.5, 44.3, 28.3. **HRMS** (ESI), calcd. for C<sub>22</sub>H<sub>19</sub>N<sub>2</sub> (M+H)<sup>+</sup>: 311.1543, found: 311.1546.

### 2-phenyl-5,12a-dihydroindolo[2,1-a]isoquinoline-12,12(6H)-dicarbonitrile (4n)

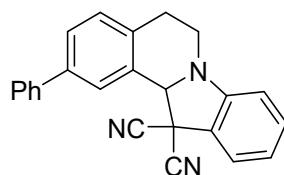

White solid (35.7 mg, 51 %). mp. 157-158 °C. TLC (PE : EA, 10:1 v/v):  $R_f$  = 0.24. **<sup>1</sup>H NMR** (400 MHz, CDCl<sub>3</sub>):  $\delta$  7.78 (s, 1H), 7.68-7.44 (m, 6H), 7.43-7.29 (m, 3H), 6.94 (t,  $J$  = 7.5 Hz, 1H), 6.78 (d,  $J$  = 8.0 Hz, 1H), 5.27 (s, 1H), 3.96-3.82 (m, 1H), 3.31-3.15 (m, 2H), 2.98-2.86 (m, 1H). **<sup>13</sup>C NMR** (100 MHz,

CDCl<sub>3</sub>):  $\delta$  149.5, 140.3, 140.0, 134.6, 132.2, 130.2, 130.1, 129.0, 127.7, 127.7, 127.1, 125.0, 124.1, 121.9, 120.6, 115.0, 112.3, 109.7, 72.2, 42.7, 42.5, 28.4. **HRMS** (ESI), calcd. for C<sub>24</sub>H<sub>18</sub>N<sub>3</sub> (M+H)<sup>+</sup>: 348.1495, found: 348.1493.

**7-chloro-2-phenyl-1,2,3,4-tetrahydroisoquinoline-1-carbonitrile (3o)**<sup>15</sup>

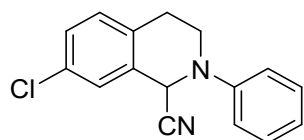

White solid (9.0 mg, 16 %). mp. 108-109 °C. TLC (PE : EA, 10:1 v/v): R<sub>f</sub> = 0.26. **<sup>1</sup>H NMR** (400 MHz, CDCl<sub>3</sub>):  $\delta$  7.41-7.33 (m, 2H), 7.32-7.7.26 (m, 2H), 7.18 (d, *J* = 8.2 Hz, 1H), 7.10-7.01 (m, 3H), 5.46 (s, 1H), 3.77 (dddd, *J* = 12.5, 5.9, 2.6, 1.0 Hz, 1H), 3.46 (ddd, *J* = 12.5, 10.9, 4.0 Hz, 1H), 3.16-3.05 (m, 1H), 2.93 (dt, *J* = 16.4, 3.3 Hz, 1H). **<sup>13</sup>C NMR** (100 MHz, CDCl<sub>3</sub>):  $\delta$  148.1, 133.1, 132.4, 131.1, 130.8, 129.7, 129.1, 127.0, 122.4, 117.9, 117.2, 53.1, 44.1, 28.0.

**2-chloro-5,12a-dihydroindolo[2,1-*a*]isoquinoline-12,12(6*H*)-dicarbonitrile (4o)**

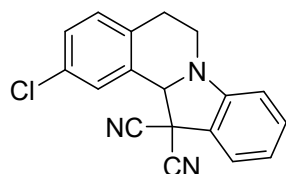

White solid (39.9 mg, 65 %). mp. 152-153 °C. TLC (P E: EA, 10:1 v/v): R<sub>f</sub> = 0.17. **<sup>1</sup>H NMR** (400 MHz, CDCl<sub>3</sub>):  $\delta$  7.63-7.46 (m, 2H), 7.44-7.29 (m, 2H), 7.27-7.15 (m, 1H), 6.95 (t, *J* = 7.6 Hz, 1H), 6.77 (d, *J* = 8.1 Hz, 1H), 5.14 (s, 1H), 3.96-3.77 (m, 1H), 3.25-3.06 (m, 2H), 2.94-2.81 (m, 1H). **<sup>13</sup>C NMR** (100 MHz, CDCl<sub>3</sub>):  $\delta$  149.2, 134.2, 133.0, 132.3, 131.4, 131.0, 129.3, 125.5, 124.9, 121.8, 120.8, 114.7, 111.9, 109.7, 71.5, 42.5, 42.4, 28.4. **HRMS** (ESI), calcd. for C<sub>18</sub>H<sub>13</sub>ClN<sub>3</sub> (M+H)<sup>+</sup>: 306.0793, found: 306.0790.

**7-bromo-2-phenyl-1,2,3,4-tetrahydroisoquinoline-1-carbonitrile (3p)**

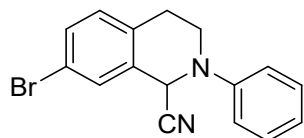

White solid (9.0 mg, 14 %). mp. 90-91 °C. TLC (PE : EA, 10:1 v/v): R<sub>f</sub> = 0.31. **<sup>1</sup>H NMR** (400 MHz, CDCl<sub>3</sub>):  $\delta$  7.48-7.30 (m, 4H), 7.16-6.98 (m, 4H), 5.46 (s, 1H), 3.83-3.71 (m, 1H), 3.45 (td, *J* = 11.5, 4.0 Hz, 1H), 3.17-3.01 (m, 1H), 2.91 (dt, *J* = 16.4, 3.1 Hz, 1H). **<sup>13</sup>C NMR** (100 MHz, CDCl<sub>3</sub>):  $\delta$  148.1, 133.6, 132.0, 131.5, 131.0, 129.9, 129.7, 122.4, 120.2, 117.9, 117.2, 52.9, 44.1, 28.1. **HRMS** (ESI), calcd. for C<sub>16</sub>H<sub>14</sub>BrN<sub>2</sub> (M+H)<sup>+</sup>: 313.0335, found: 313.0334.

**2-bromo-5,12a-dihydroindolo[2,1-*a*]isoquinoline-12,12(6*H*)-dicarbonitrile (4p)**



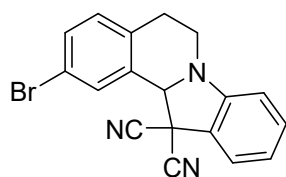

White solid (59.8 mg, 85 %). mp. 158-159 °C. TLC (PE : EA, 10:1 v/v):  $R_f = 0.17$ .  $^1\text{H NMR}$  (400 MHz,  $\text{CDCl}_3$ ):  $\delta$  7.69 (s, 1H), 7.56-7.43 (m, 2H), 7.37 (t,  $J = 7.6$  Hz, 1H), 7.14 (d,  $J = 8.2$  Hz, 1H), 6.94 (t,  $J = 7.5$  Hz, 1H), 6.66 (d,  $J = 8.0$  Hz, 1H), 5.14 (s, 1H), 3.94-3.77 (m, 1H), 3.25-3.01 (m, 2H), 2.84 (d,  $J = 15.8$  Hz, 1H).  $^{13}\text{C NMR}$  (100 MHz,  $\text{CDCl}_3$ ):  $\delta$  149.2, 137.4, 132.3, 132.1, 131.7, 131.3, 128.4, 124.9, 121.7, 120.8, 120.7, 114.7, 111.9, 109.7, 71.3, 42.5, 42.3, 28.4. **HRMS** (ESI), calcd. for  $\text{C}_{18}\text{H}_{13}\text{BrN}_3$  ( $\text{M}+\text{H}$ ) $^+$ : 350.0287, found: 350.0289.

#### 6,7-dimethoxy-2-phenyl-1,2,3,4-tetrahydroisoquinoline-1-carbonitrile (3q)<sup>11</sup>

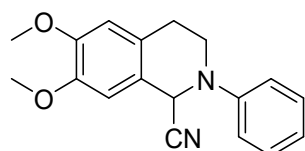

Yellow solid (12.6 mg, 21 %). mp. 136-137 °C (lit.<sup>11</sup> 137-138 °C). TLC (PE : EA, 5:1 v/v):  $R_f = 0.30$ .  $^1\text{H NMR}$  (400 MHz,  $\text{CDCl}_3$ ):  $\delta$  7.36 (t,  $J = 8.2$  Hz, 2H), 7.08 (d,  $J = 8.4$  Hz, 2H), 7.02 (t,  $J = 7.3$  Hz, 1H), 6.75 (s, 1H), 6.69 (s, 1H), 5.45 (s, 1H), 3.89 (s, 6H), 3.82-3.74 (m, 1H), 3.45 (td,  $J = 12.1, 3.9$  Hz, 1H), 3.14-3.03 (m, 1H), 2.86 (dt,  $J = 16.0, 2.8$  Hz, 1H).  $^{13}\text{C NMR}$  (100 MHz,  $\text{CDCl}_3$ ):  $\delta$  149.4, 148.5, 148.1, 129.6, 126.9, 122.0, 121.1, 117.9, 117.8, 111.5, 109.3, 56.1, 56.0, 53.1, 44.2, 28.1.

#### 2,3-dimethoxy-5,12a-dihydroindolo[2,1-a]isoquinoline-12,12(6H)-dicarbonitrile (4q)

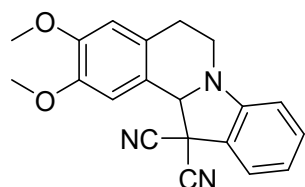

Yellow solid (35.7 mg, 54 %). mp. 168-169 °C. TLC (PE : EA, 5:1 v/v):  $R_f = 0.21$ .  $^1\text{H NMR}$  (400 MHz,  $\text{CDCl}_3$ ):  $\delta$  7.50 (d,  $J = 7.3$  Hz, 1H), 7.36 (t,  $J = 7.5$  Hz, 1H), 7.03 (s, 1H), 6.92 (t,  $J = 7.2$  Hz, 1H), 6.80-6.67 (s, 2H), 5.20 (s, 1H), 4.00-3.79 (m, 7H), 3.27-3.04 (m, 2H), 2.78 (d,  $J = 15.3$  Hz, 1H).  $^{13}\text{C NMR}$  (100 MHz,  $\text{CDCl}_3$ ):  $\delta$  149.6, 149.4, 148.3, 132.2, 128.2, 125.0, 121.9, 121.3, 120.4, 115.3, 112.4, 111.9, 109.7, 108.0, 71.9, 56.1, 55.9, 43.1, 42.6, 28.3. **HRMS** (ESI), calcd. for  $\text{C}_{20}\text{H}_{18}\text{N}_3\text{O}_2$  ( $\text{M}+\text{H}$ ) $^+$ : 332.1394, found: 332.1398.

#### 6-bromo-2-phenyl-1,2,3,4-tetrahydroisoquinoline-1-carbonitrile (3r)

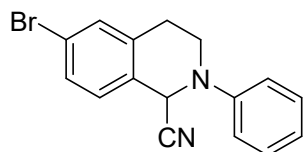

Colorless oil (11.0 mg, 17 %). TLC (PE : EA, 10:1 v/v):  $R_f = 0.38$ .  $^1\text{H NMR}$  (400 MHz,  $\text{CDCl}_3$ ):  $\delta$  7.44-7.33 (m, 4H), 7.20-7.14 (m, 1H), 7.10-7.00 (m, 3H), 5.45 (s, 1H), 3.80-3.72 (m, 1H), 3.45 (td,  $J = 12.4,$

11.0, 4.0 Hz, 1H), 3.20-3.07 (m, 1H), 2.94 (dt,  $J = 16.5, 3.3$  Hz, 1H).  $^{13}\text{C}$  NMR (100 MHz,  $\text{CDCl}_3$ ):  $\delta$  148.1, 136.8, 132.3, 130.1, 129.6, 128.6, 128.6, 122.7, 122.3, 117.9, 117.2, 53.0, 43.9, 28.4. HRMS (ESI), calcd. for  $\text{C}_{16}\text{H}_{14}\text{BrN}_2$  ( $\text{M}+\text{H}$ ) $^+$ : 313.0335, found: 313.0337.

#### 3-bromo-5,12a-dihydroindolo[2,1-*a*]isoquinoline-12,12(6*H*)-dicarbonitrile (4r)

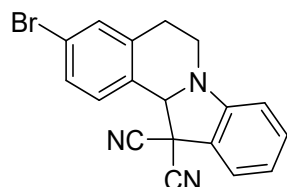

White solid (46.3 mg, 66 %). mp. 160-161 °C. TLC (PE : EA, 10:1 v/v):  $R_f = 0.26$ .  $^1\text{H}$  NMR (400 MHz,  $\text{CDCl}_3$ ):  $\delta$  7.55-7.32 (m, 5H), 6.95 (t,  $J = 7.5$  Hz, 1H), 6.76 (d,  $J = 8.0$  Hz, 1H), 5.12 (s, 1H), 3.94-3.76 (m, 1H), 3.24-3.10 (m, 2H), 2.93-2.82 (m, 1H).  $^{13}\text{C}$  NMR (100 MHz,  $\text{CDCl}_3$ ):  $\delta$  149.2, 137.9, 132.6, 132.3, 130.4, 128.7, 127.1, 124.9, 123.0, 121.7, 120.8, 114.8, 112.0, 109.7, 71.6, 42.4, 42.1, 28.5. HRMS (ESI), calcd. for  $\text{C}_{18}\text{H}_{13}\text{BrN}_3$  ( $\text{M}+\text{H}$ ) $^+$ : 350.0287, found: 350.0289.

#### methyl 2-bromo-12-cyano-5,6,12,12a-tetrahydroindolo[2,1-*a*]isoquinoline-12-carboxylate (4s)

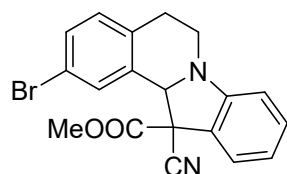

Yellow solid (52.8 mg, 68 %). mp. 77-78 °C. TLC (PE : EA, 10:1 v/v):  $R_f = 0.19$ . Isolated diastereomeric ratio = 4:1;  $^1\text{H}$  NMR (400 MHz,  $\text{CDCl}_3$ ):  $\delta$  7.59 (s, 1H, minor isomer), 7.41-7.26 (m, 4H, mixture of isomers), 7.09-7.03 (m, 1H, mixture of isomers), 6.84-6.77 (m, 1H, mixture of isomers), 6.71 (d,  $J = 8.1$  Hz, 1 H, mixture of isomers), 5.48 (s, 1H, mixture of isomers), 4.06 (s, 3H, major isomer), 3.92-3.78 (m, 1H, mixture of isomers), 3.45 (s, 3H, minor isomer), 3.25-3.15 (m, 1H, mixture of isomers), 3.10-2.98 (m, 1H, mixture of isomers), 2.74 (d,  $J = 15.9$  Hz, 1H, mixture of isomers).  $^{13}\text{C}$  NMR (100 MHz,  $\text{CDCl}_3$ ):  $\delta$  167.1 (165.0), 149.5 (150.3), 134.8 (135.1), 133.9 (133.5), 131.3 (131.2), 131.1, 131.0 (130.8), 129.3 (128.6), 124.7 (125.0), 124.3 (124.7), 120.1 (120.0), 119.6 (119.4), 115.5, 109.2 (109.3), 68.5 (70.3), 54.7 (55.9), 53.3, 42.7 (42.7), 28.0 (28.4). HRMS (ESI), calcd. for  $\text{C}_{19}\text{H}_{16}\text{BrN}_2\text{O}_2$  ( $\text{M}+\text{H}$ ) $^+$ : 383.0390, found: 383.0386.

#### methyl 12-cyano-5,6,12,12a-tetrahydroindolo[2,1-*a*]isoquinoline-12-carboxylate (4t)

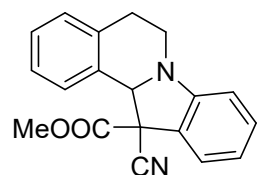

Colorless oil (23.5 mg, 38 %). TLC (PE : DCM, 1:1 v/v):  $R_f = 0.35$ . Isolated diastereomeric ratio = 4:1;  $^1\text{H}$  NMR (400 MHz,  $\text{CDCl}_3$ ):  $\delta$  7.49-7.45 (m, 1H, minor isomer), 7.34-7.26 (m, 4H, mixture of isomers), 7.22-7.17 (m, 1H, mixture of isomers), 7.16-7.12 (m, 1H, mixture of isomers), 6.83-6.76 (m, 1H, mixture of isomers), 6.72 (d,  $J = 8.0$  Hz, 1H, mixture of isomers), 5.56 (s, 1H, minor isomer), 5.52 (s, 1H, major

isomer), 4.05 (s, 3H, major isomer), 3.93-3.78 (m, 1H, mixture of isomers), 3.34 (s, 3H, minor isomer), 3.26 (td,  $J = 11.6, 3.4$  Hz, 1H, mixture of isomers), 3.20-3.09 (m, 1H, major isomer), 3.08-2.98 (m, 1H, minor isomer), 2.85-2.75 (m, 1H, mixture of isomers).  $^{13}\text{C NMR}$  (100 MHz,  $\text{CDCl}_3$ ):  $\delta$  167.6 (165.3), 149.8 (150.7), 135.7 (136.0), 131.8 (131.3), 131.2 (131.1), 129.4 (129.1), 128.0 (127.9), 126.7 (126.6), 126.3 (125.9), 124.6 (124.6), 124.5, 119.4 (119.1), 115.8, 109.0 (109.2), 69.3 (70.9), 54.5 (56.0), 53.1, 42.8 (43.0), 28.3 (28.9). **HRMS** (ESI), calcd. for  $\text{C}_{19}\text{H}_{17}\text{N}_2\text{O}_2$  ( $\text{M}+\text{H}$ ) $^+$ : 305.1285, found: 305.1281.

**ethyl 2-bromo-12-cyano-5,6,12,12a-tetrahydroindolo[2,1-*a*]isoquinoline-12-carboxylate (4u)**

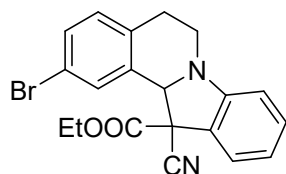

Colorless oil (44.4 mg, 56 %). TLC (PE : EA, 10:1 v/v):  $R_f = 0.24$ . Isolated diastereomeric ratio = 4:1;  $^1\text{H NMR}$  (400 MHz,  $\text{CDCl}_3$ ):  $\delta$  7.63 (d,  $J = 1.7$  Hz, 1H, minor isomer), 7.41-7.26 (m, 4H, mixture of isomers), 7.11-7.03 (m, 1H, mixture of isomers), 6.81 (t,  $J = 7.6$  Hz, 1H, mixture of isomers), 6.71 (d,  $J = 8.0$  Hz, 1H, mixture of isomers), 5.47 (s, 1H, mixture of isomers), 4.58-4.47 (m, 2H, major isomer), 3.97-3.77 (m, 1H, mixture of isomers), 3.21 (td,  $J = 11.9, 3.6$  Hz, 1H, mixture of isomers), 3.11-3.96 (m, 1H, mixture of isomers), 2.82-2.70 (m, 1H, mixture of isomers), 1.48 (t,  $J = 7.2$  Hz, 3H, major isomer), 0.98 (t,  $J = 7.1$  Hz, 3H, minor isomer).  $^{13}\text{C NMR}$  (100 MHz,  $\text{CDCl}_3$ ):  $\delta$  166.6, 149.5, 134.8, 133.9, 131.2 (131.2), 131.1, 131.0 (130.7), 129.3 (128.8), 124.6 (124.6), 124.5, 120.1, 119.7, 115.6, 109.1, 68.5 (70.3), 64.1 (62.9), 55.9, 42.7, 28.1 (28.6), 14.2 (13.6). **HRMS** (ESI), calcd. for  $\text{C}_{20}\text{H}_{18}\text{BrN}_2\text{O}_2$  ( $\text{M}+\text{H}$ ) $^+$ : 397.0546, found: 397.0542.

**propyl 2-bromo-12-cyano-5,6,12,12a-tetrahydroindolo[2,1-*a*]isoquinoline-12-carboxylate (4v)**

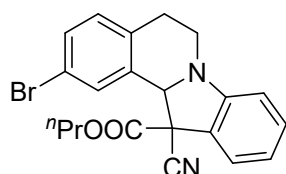

Colorless oil (49.5 mg, 60 %). TLC (PE : EA, 10:1 v/v):  $R_f = 0.29$ . Isolated diastereomeric ratio = 4:1;  $^1\text{H NMR}$  (400 MHz,  $\text{CDCl}_3$ ):  $\delta$  7.62 (d,  $J = 1.3$  Hz, 1H, minor isomer), 7.41-7.26 (m, 4H, mixture of isomers), 7.10-7.03 (m, 1H, mixture of isomers), 6.80 (td,  $J = 7.6, 0.7$  Hz, 1H, mixture of isomers), 6.70 (d,  $J = 8.0$  Hz, 1H, mixture of isomers), 5.46 (s, 1H, major isomer), 5.44 (s, 1H, minor isomer), 4.50-4.43 (m, 2H, major isomer), 3.90-3.74 (m, 1H, mixture of isomers), 3.26-3.15 (m, 1H, mixture of isomers), 3.10-2.92 (m, 1H, mixture of isomers), 2.75 (d,  $J = 15.8$  Hz, 1H, mixture of isomers), 1.93-1.81 (m, 2H, major isomer), 1.47-1.35 (m, 2H, minor isomer), 1.07 (t,  $J = 7.5$  Hz, 3H, major isomer), 0.78 (t,  $J = 7.5$  Hz, 3H, minor isomer).  $^{13}\text{C NMR}$  (100 MHz,  $\text{CDCl}_3$ ):  $\delta$  166.7 (164.6), 149.5 (150.3), 134.8 (135.0), 134.0 (133.7), 131.2 (131.1), 131.1 (130.9), 131.0 (130.8), 129.2 (128.6), 124.6 (125.4), 124.5 (124.5), 120.1 (120.0), 119.6 (119.4), 115.5 (115.3), 109.1 (109.2), 69.5 (70.2), 68.5 (68.4), 55.9 (55.7), 42.6, 28.0 (28.5), 22.0 (21.5), 10.4 (10.1). **HRMS** (ESI), calcd. for  $\text{C}_{21}\text{H}_{20}\text{BrN}_2\text{O}_2$  ( $\text{M}+\text{H}$ ) $^+$ : 411.0703, found: 411.0702.

**isopropyl 2-bromo-12-cyano-5,6,12,12a-tetrahydroindolo[2,1-*a*]isoquinoline-12-carboxylate (4w)**

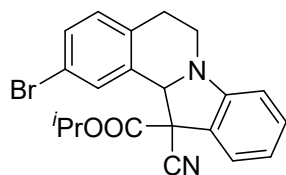

Colorless oil (41.3 mg, 50 %). TLC (PE : EA, 10:1 v/v):  $R_f = 0.24$ . Isolated diastereomeric ratio = 3:1;  **$^1\text{H NMR}$**  (400 MHz,  $\text{CDCl}_3$ ):  $\delta$  7.63 (d,  $J = 1.3$  Hz, 1H, minor isomer), 7.41-7.26 (m, 4H, mixture of isomers), 7.10-7.03 (m, 1H, mixture of isomers), 6.85-6.77 (m, 1H, mixture of isomers), 6.73-6.67 (m, 1H, mixture of isomers), 5.48-5.40 (m, 1H, mixture of isomers), 5.38-5.29 (m, 1H, major isomer), 4.75-4.65 (m, 1H, minor isomer), 3.91-3.83 (m, 1H, major isomer), 3.82-3.74 (m, 1H, minor isomer), 3.28-3.15 (m, 1H, mixture of isomers), 3.10-2.93 (m, 1H, mixture of isomers), 2.77 (d,  $J = 15.3$  Hz, 1H, mixture of isomers), 1.46 (dd,  $J = 14.8, 6.4$  Hz, 6H, major isomer), 1.02 (d,  $J = 6.2$  Hz, 3H, minor isomer), 0.93 (d,  $J = 6.2$  Hz, 3H, minor isomer).  **$^{13}\text{C NMR}$**  (100 MHz,  $\text{CDCl}_3$ ):  $\delta$  166.1, 149.5, 134.8, 134.0, 131.1, 131.0, 131.0, 129.2 (128.8), 124.6, 124.5, 120.1, 119.6 (119.3), 115.6, 109.0 (109.2), 72.4 (71.2), 68.6 (70.1), 55.9, 42.6, 28.2 (28.6), 21.7 (21.1), 21.6 (21.1). **HRMS** (ESI), calcd. for  $\text{C}_{21}\text{H}_{20}\text{BrN}_2\text{O}_2$  ( $\text{M}+\text{H}$ ) $^+$ : 411.0703, found: 411.0696.

## Supplemental Data

### 1. NMR Spectra: $^1\text{H}$ , $^{13}\text{C}$ and $^{19}\text{F}$ NMR Spectra

9370-GM-A1.esp  
9370-GM-A1.esp

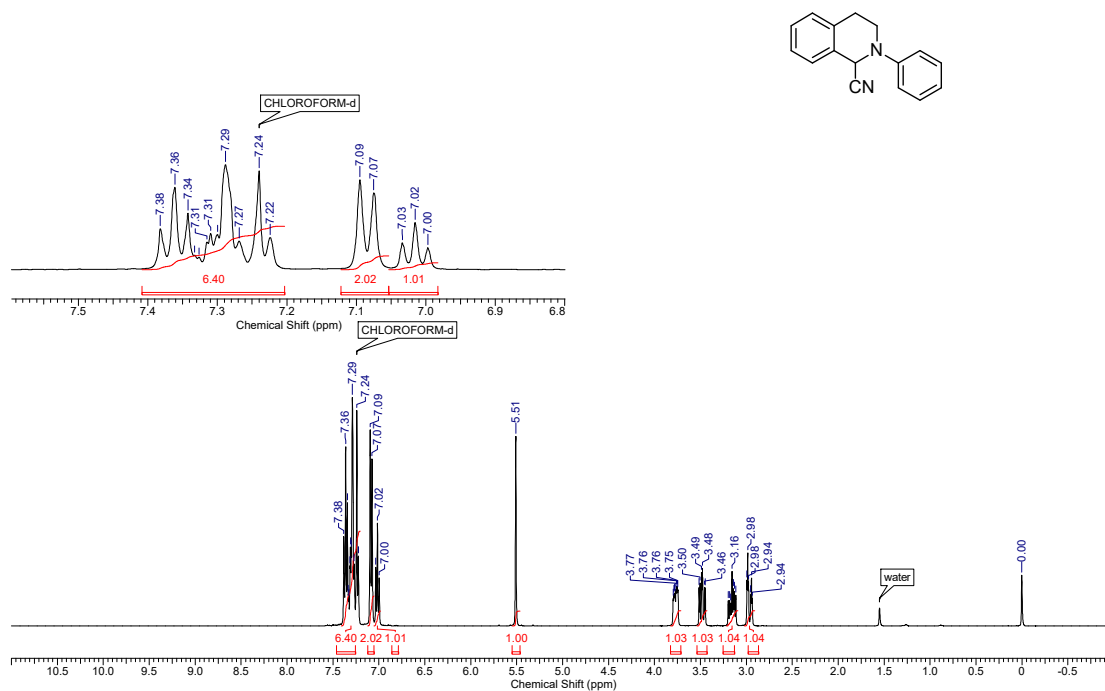

Figure S28.  $^1\text{H}$  NMR spectrum of compound 3a

704-GM-A-13C.esp  
704-GM-A-13C.esp

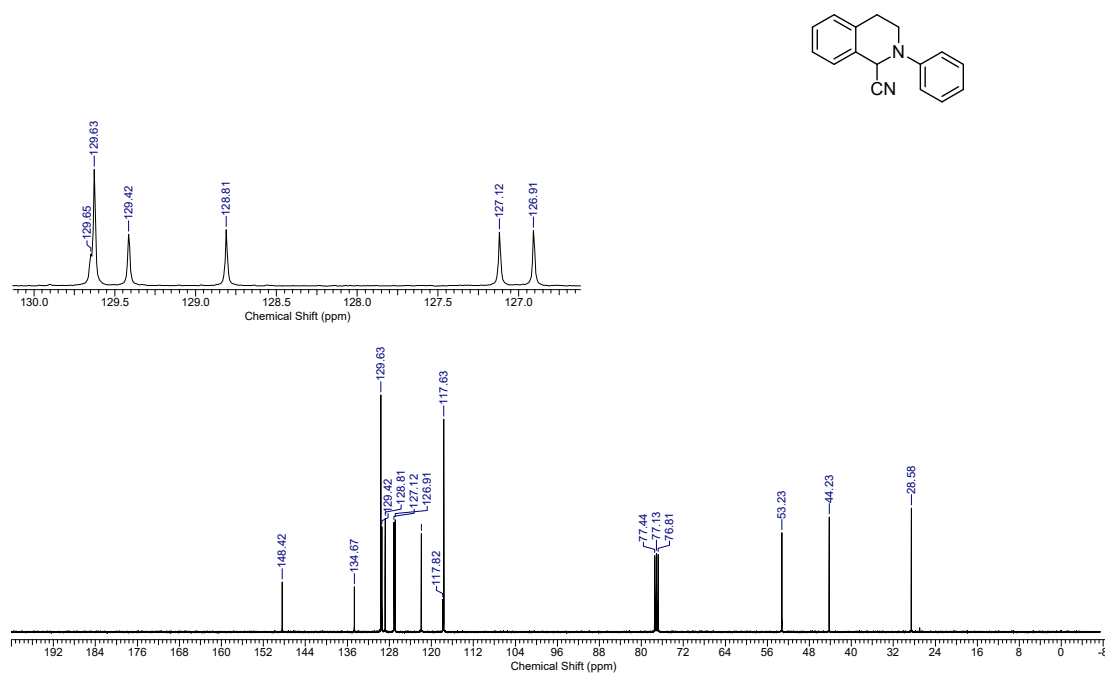

Figure S29  $^{13}\text{C}$  NMR spectrum of compound 3a

9380-GM-B1.esp  
9380-GM-B1.esp

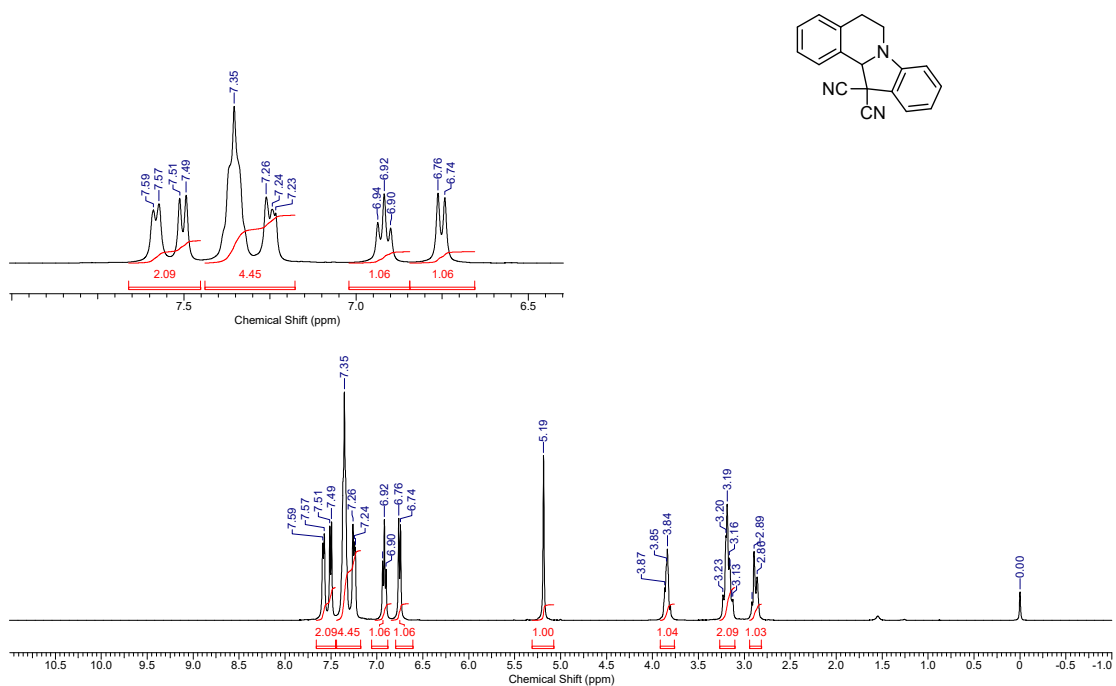

Figure S30. <sup>1</sup>H NMR spectrum of compound 4a

705-GM-B-13C.esp  
705-GM-B-13C.esp

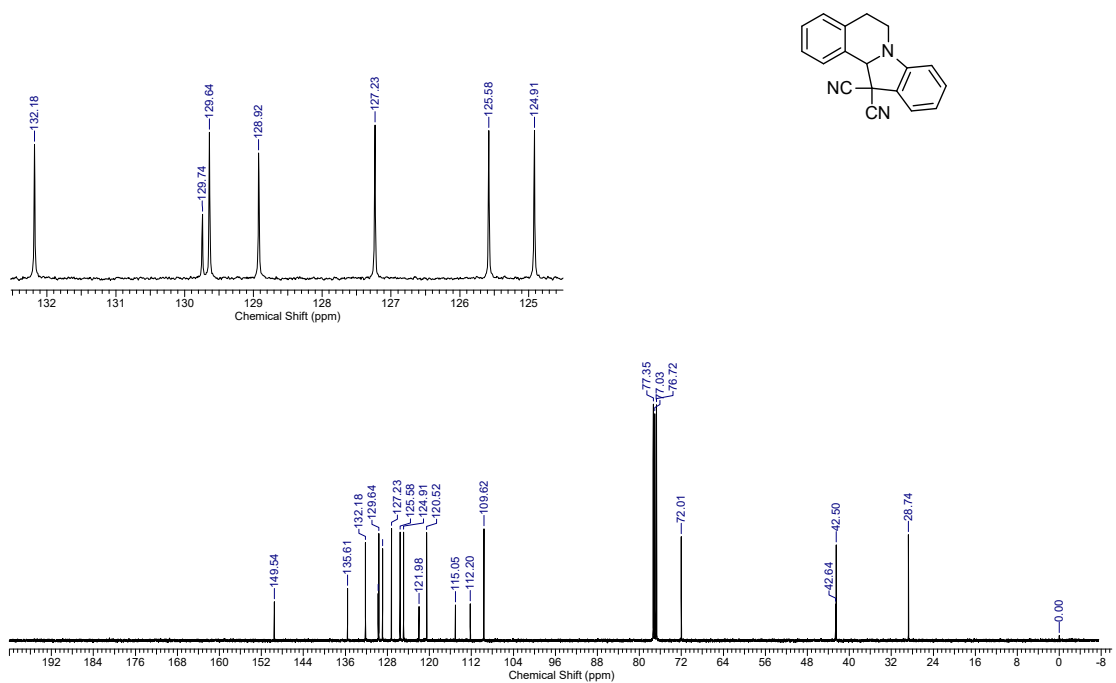

Figure S31. <sup>13</sup>C NMR spectrum of compound 4a

6230-GM-520-1.esp  
6230-GM-520-1.esp

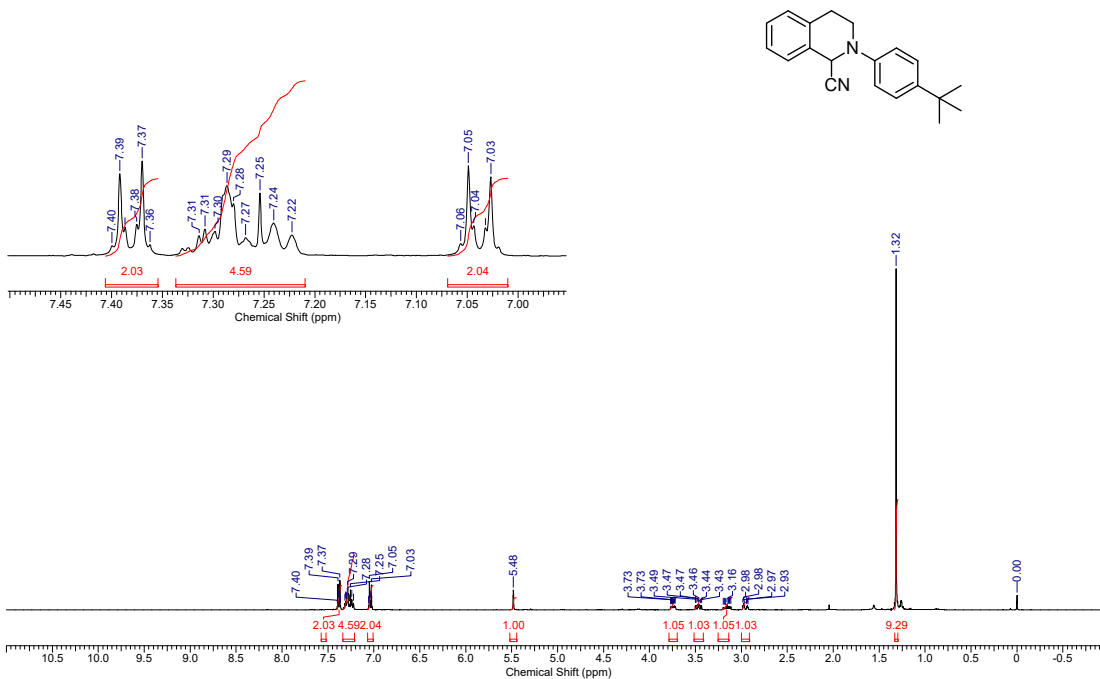

Figure S32. <sup>1</sup>H NMR spectrum of compound 3b

6231-GM-520-1-13C.esp  
6231-GM-520-1-13C.esp

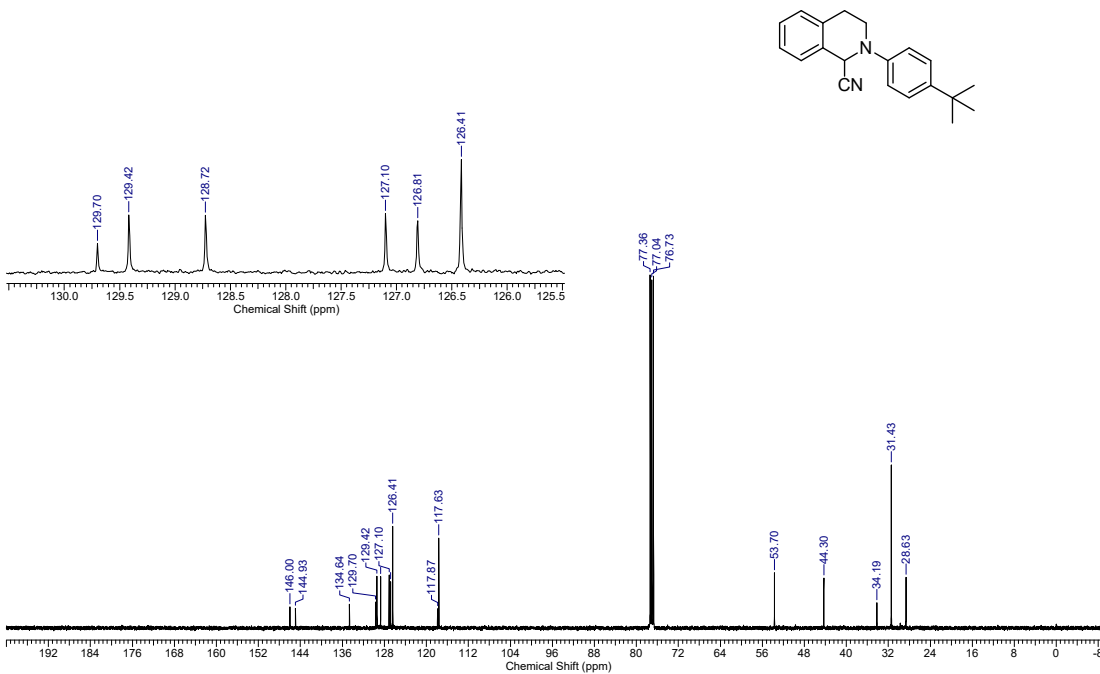

Figure S33. <sup>13</sup>C NMR spectrum of compound 3b

6240-GM-520-3.esp  
6240-GM-520-3.esp

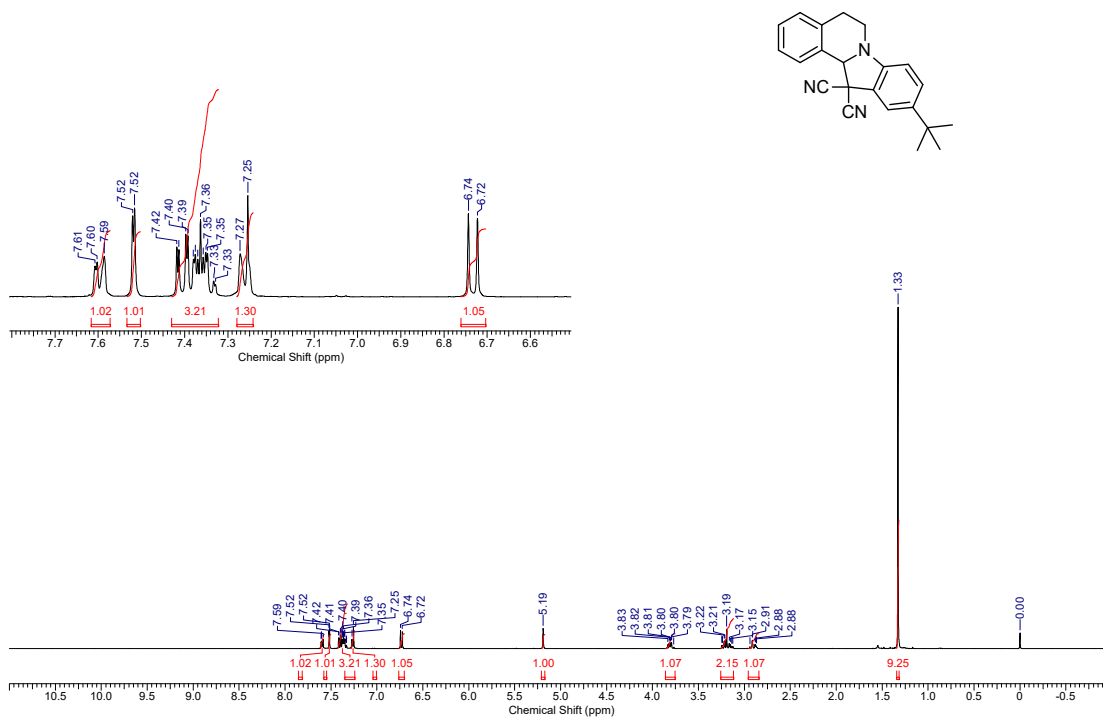

Figure S34. <sup>1</sup>H NMR spectrum of compound 4b

6241-GM-520-3-13C.esp  
6241-GM-520-3-13C.esp

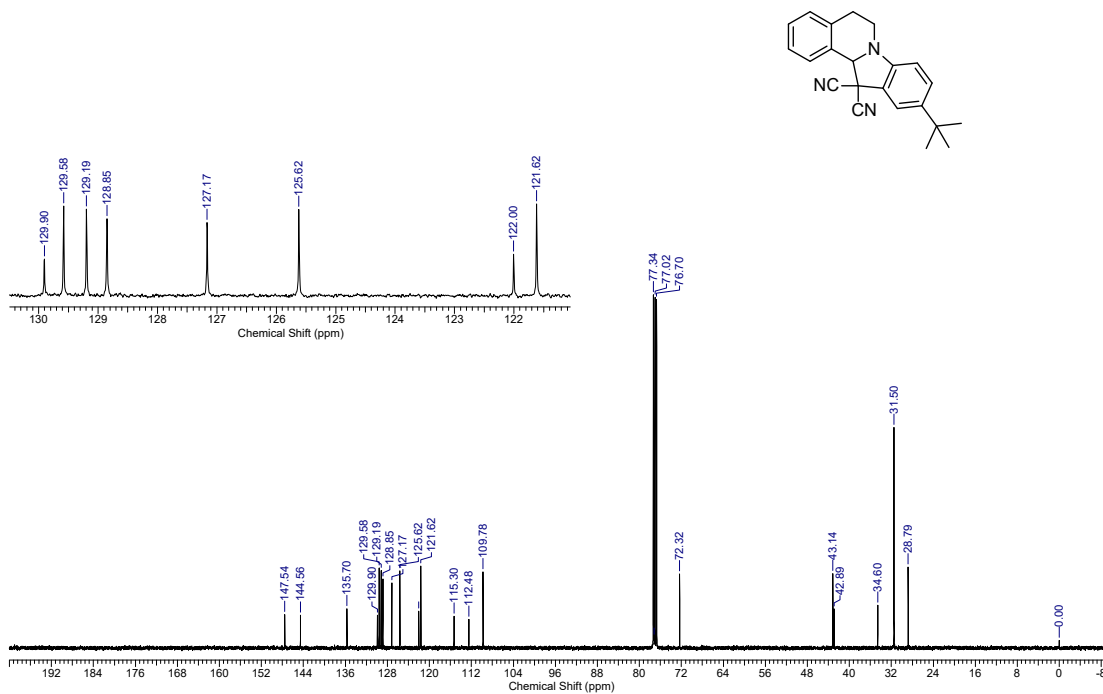

Figure S35. <sup>13</sup>C NMR spectrum of compound 4b



910-GM562-1.esp  
910-GM562-1.esp

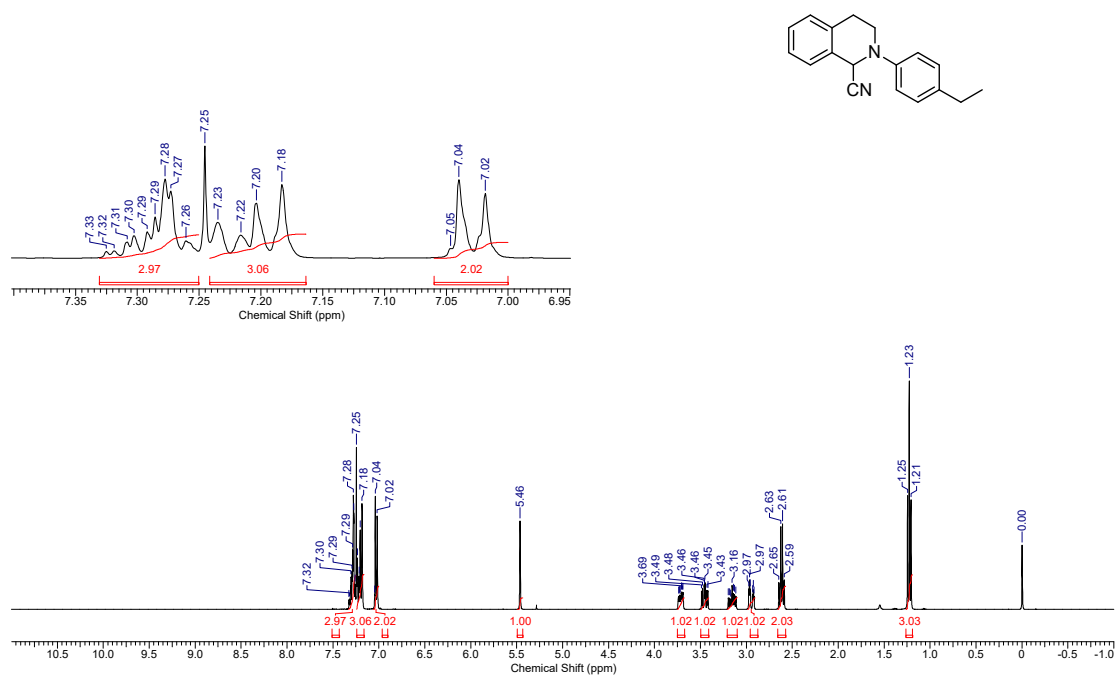

Figure S36. <sup>1</sup>H NMR spectrum of compound 3c

911-GM562-1-13C.esp  
911-GM562-1-13C.esp

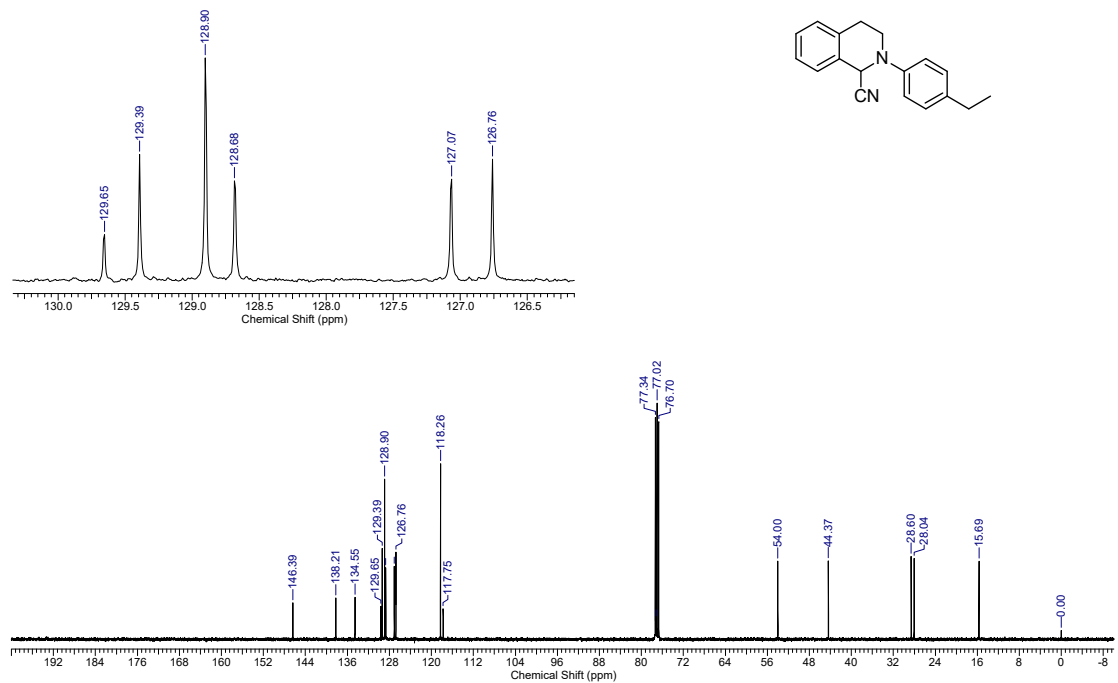

Figure S37. <sup>13</sup>C NMR spectrum of compound 3c

6220-GM-519-3.esp  
6220-GM-519-3.esp

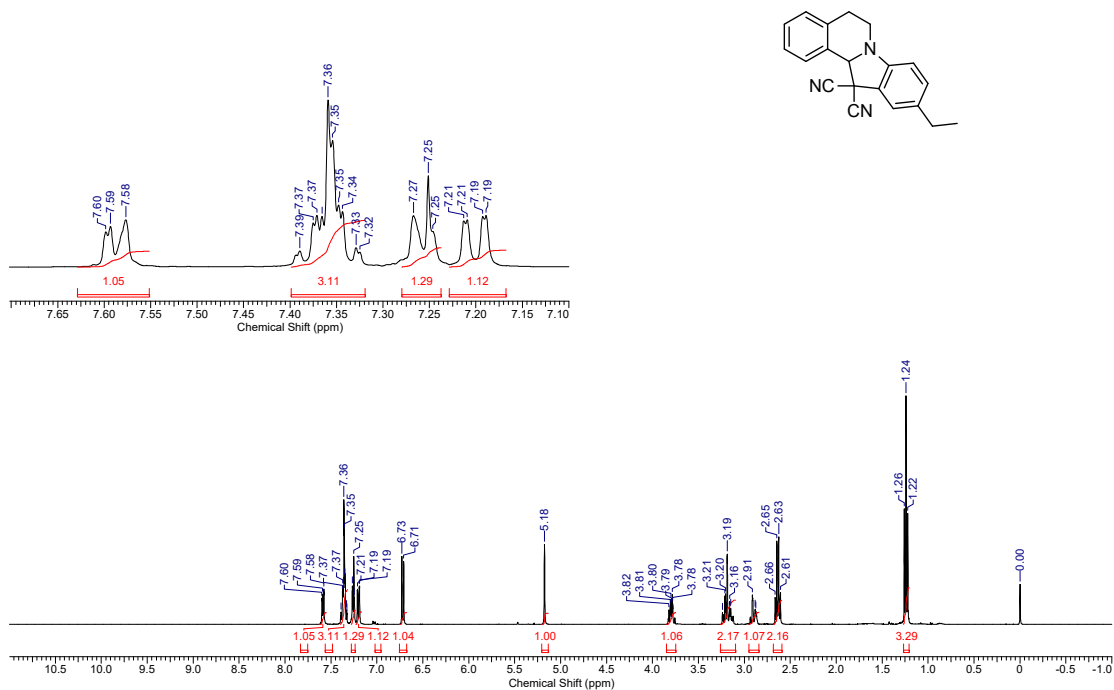

Figure S38. <sup>1</sup>H NMR spectrum of compound 4c

6221-GM-519-3-13C.esp  
6221-GM-519-3-13C.esp

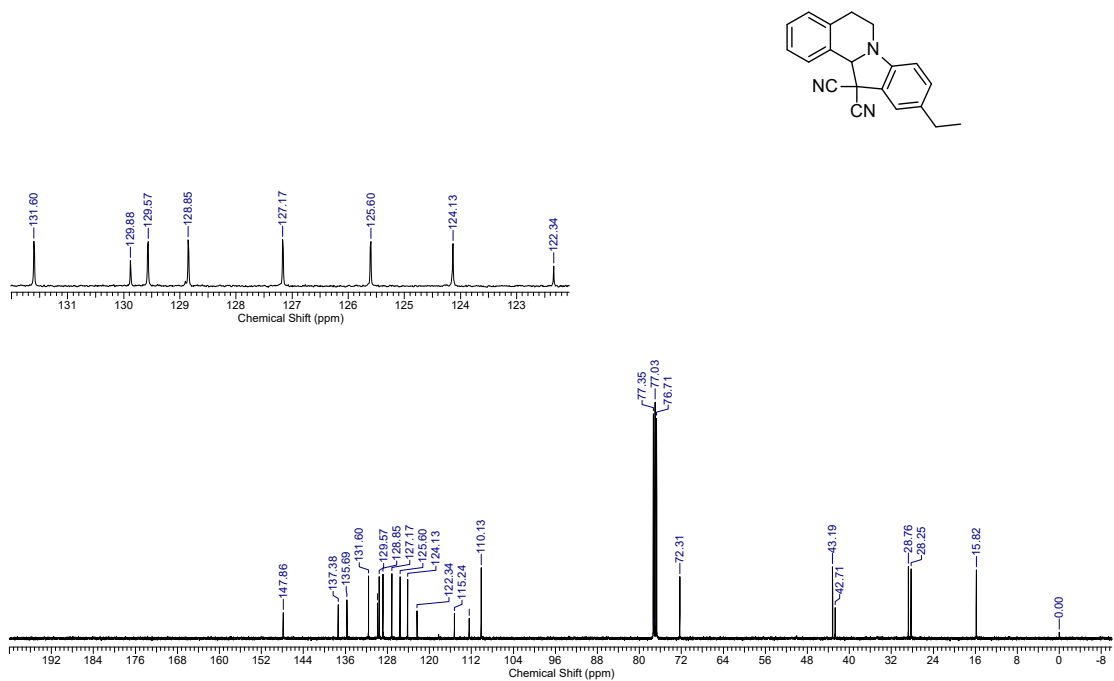

Figure S39. <sup>13</sup>C NMR spectrum of compound 4c

9880-GM548-1.esp  
9880-GM548-1.esp

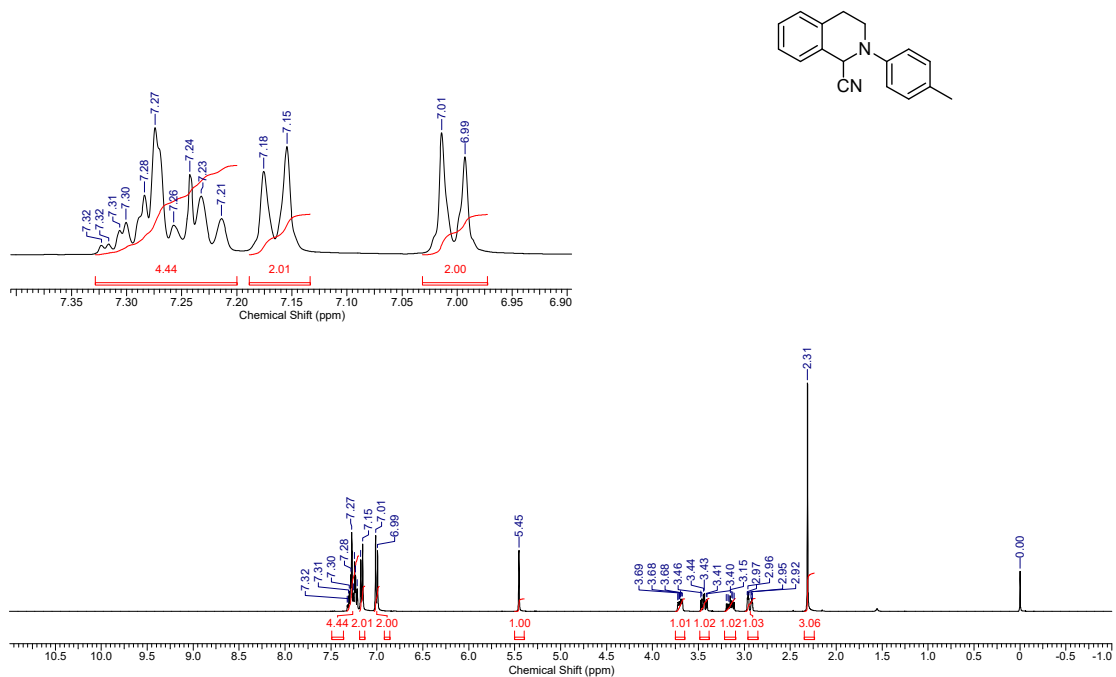

Figure S40. <sup>1</sup>H NMR spectrum of compound 3d

9881-GM548-1-13C.esp  
9881-GM548-1-13C.esp

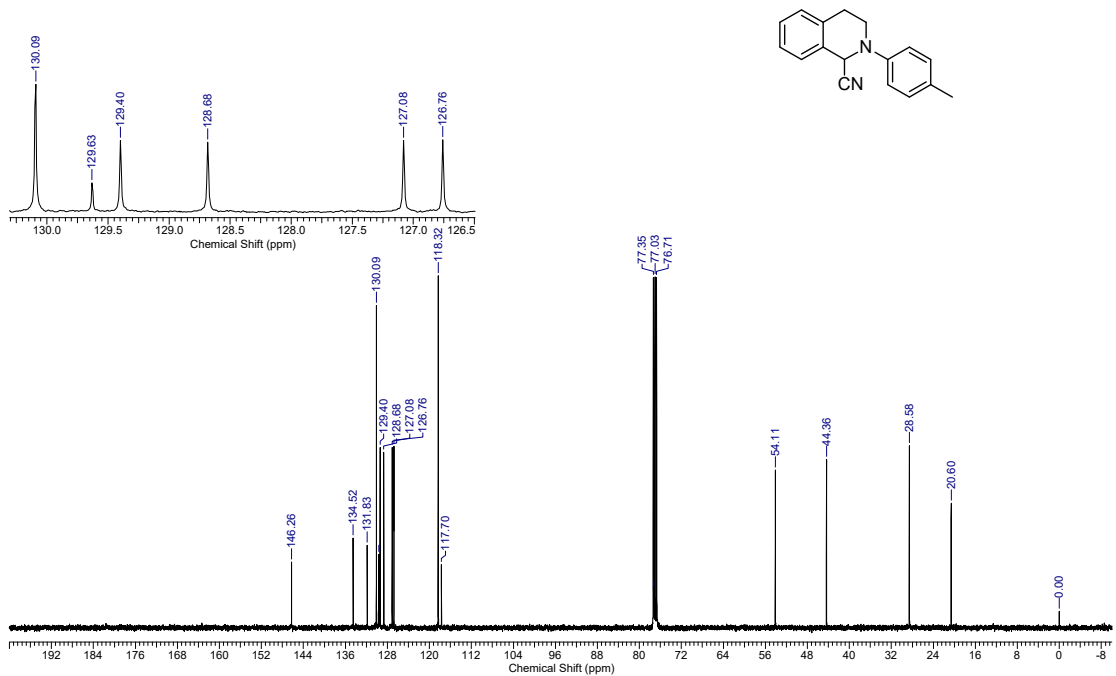

Figure S41. <sup>13</sup>C NMR spectrum of compound 3d

830-GM481-3.esp  
830-GM481-3.esp

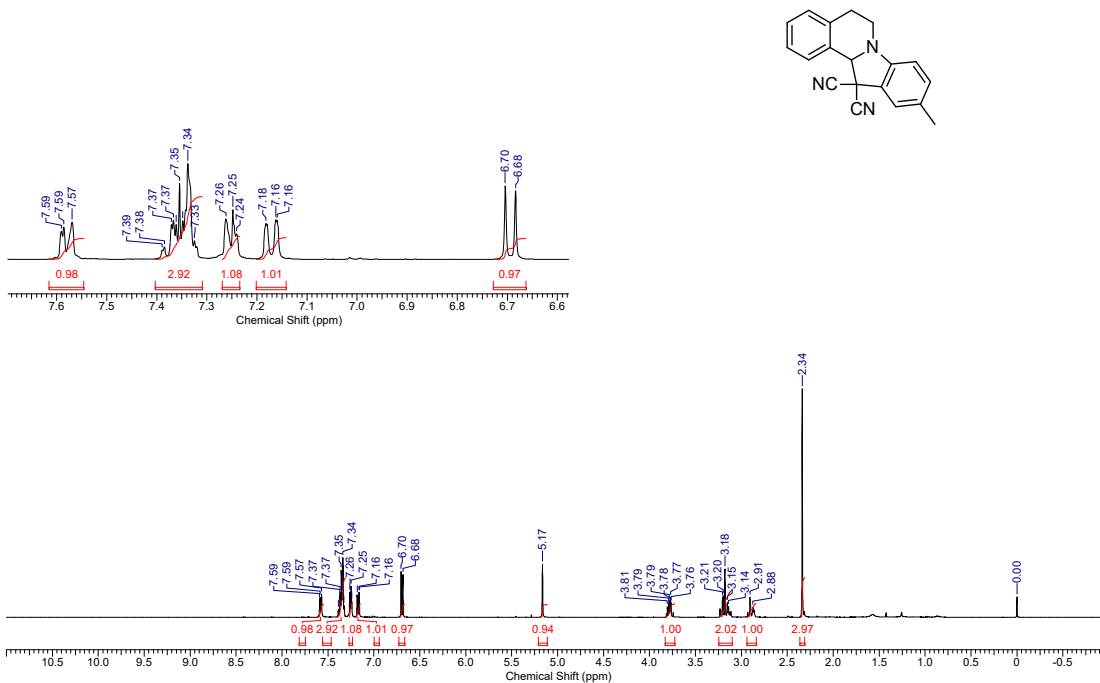

Figure S42. <sup>1</sup>H NMR spectrum of compound 4d

845-GM481-3-13C.esp  
845-GM481-3-13C.esp

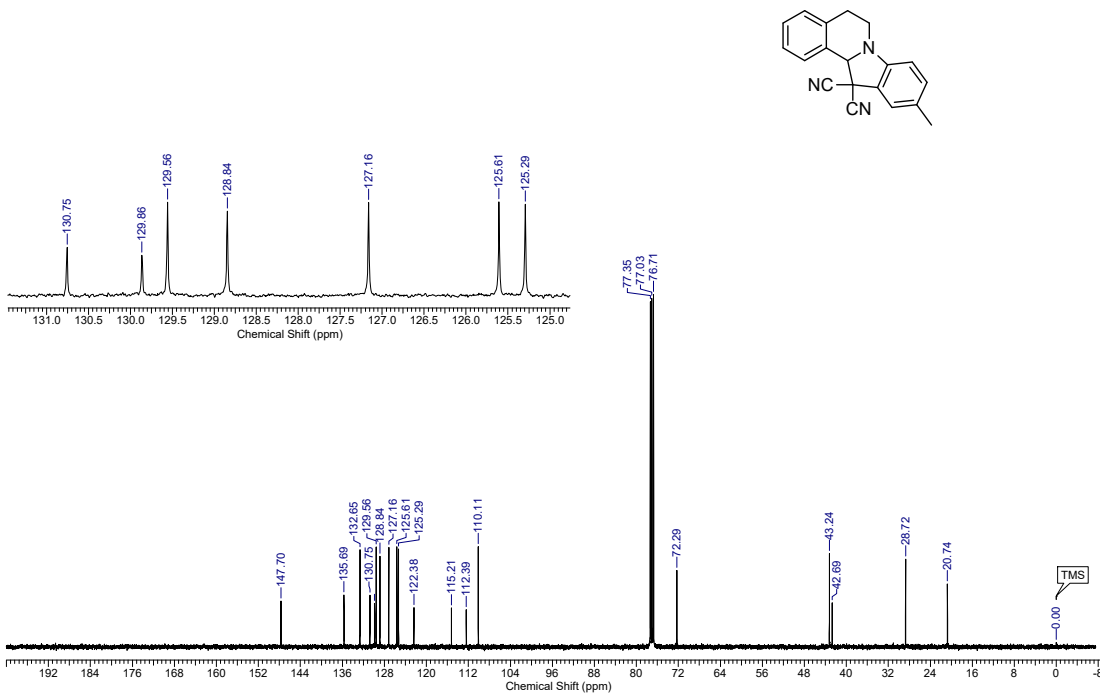

Figure S43. <sup>13</sup>C NMR spectrum of compound 4d

10260-GM-553-1.esp  
10260-GM-553-1.esp

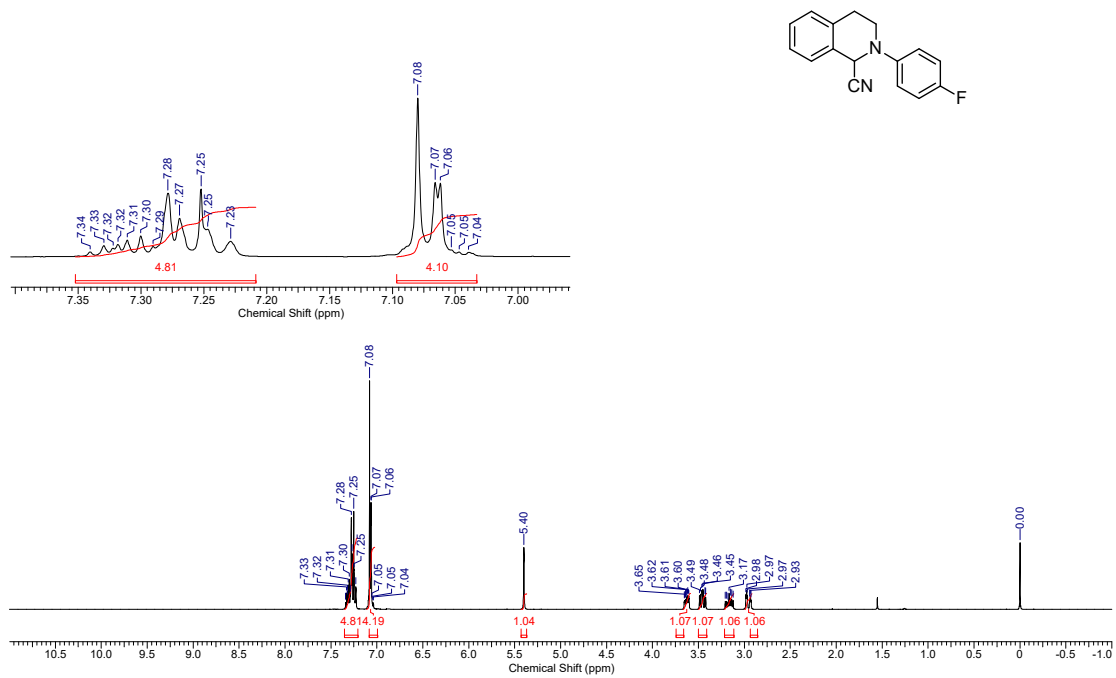

Figure S44. <sup>1</sup>H NMR spectrum of compound 3e

10261-GM-553-1-19F.esp

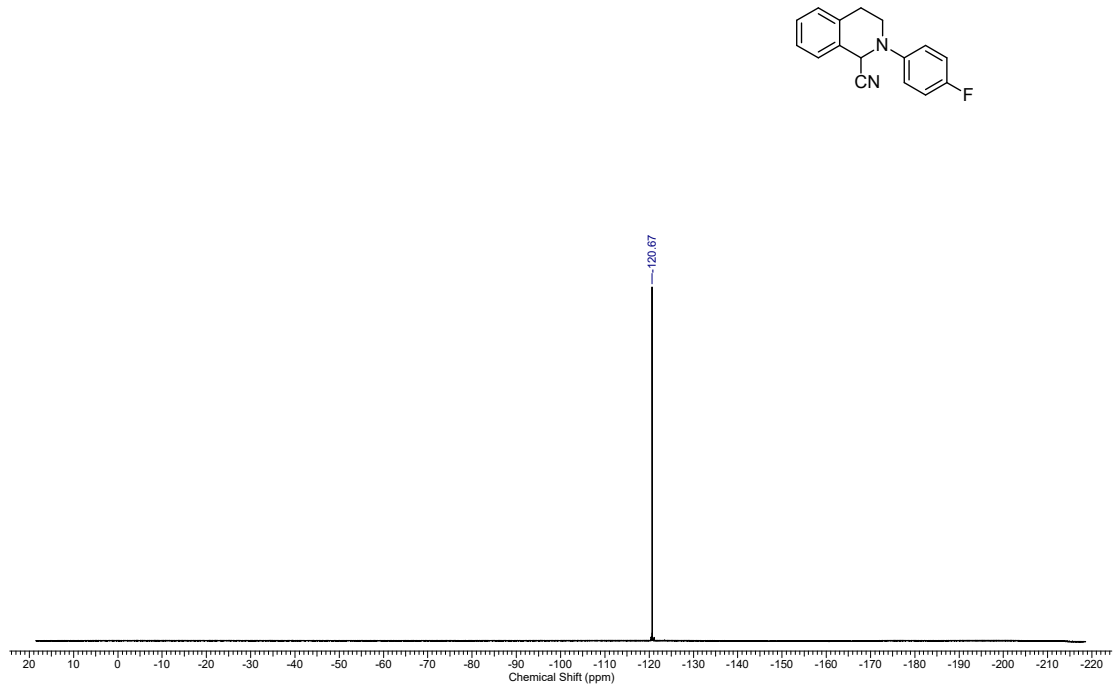

Figure S45. <sup>19</sup>F NMR spectrum of compound 3e

10262-GM-553-1-13C.esp  
10262-GM-553-1-13C.esp

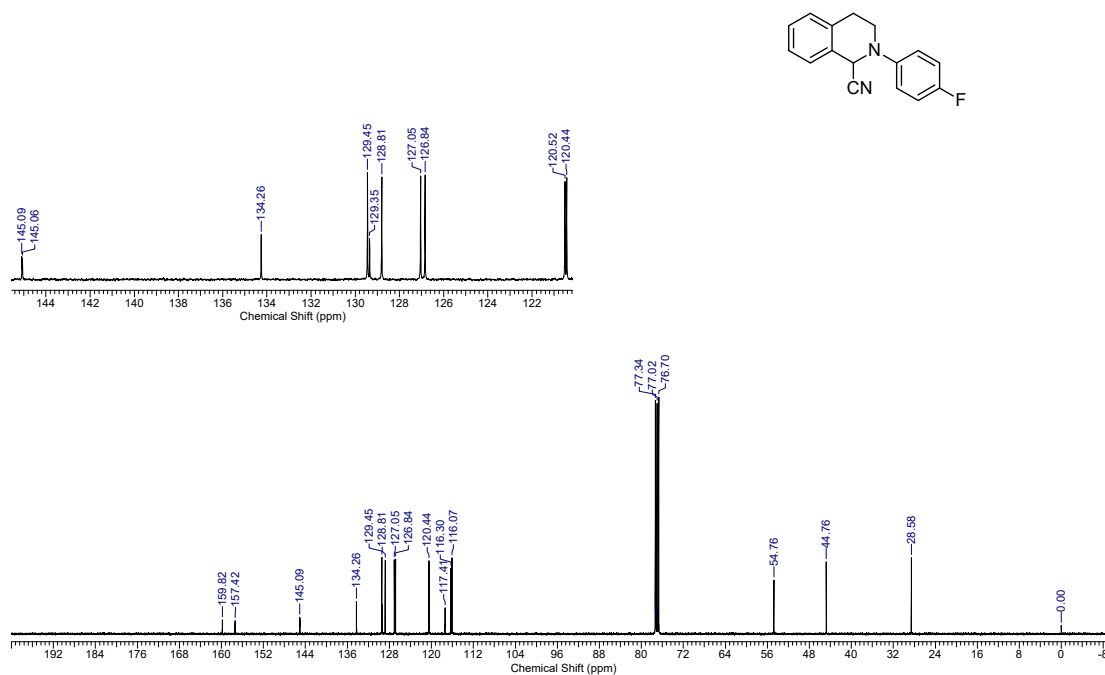

Figure S46. <sup>13</sup>C NMR spectrum of compound 3e

9550-GM476-2.esp  
9550-GM476-2.esp

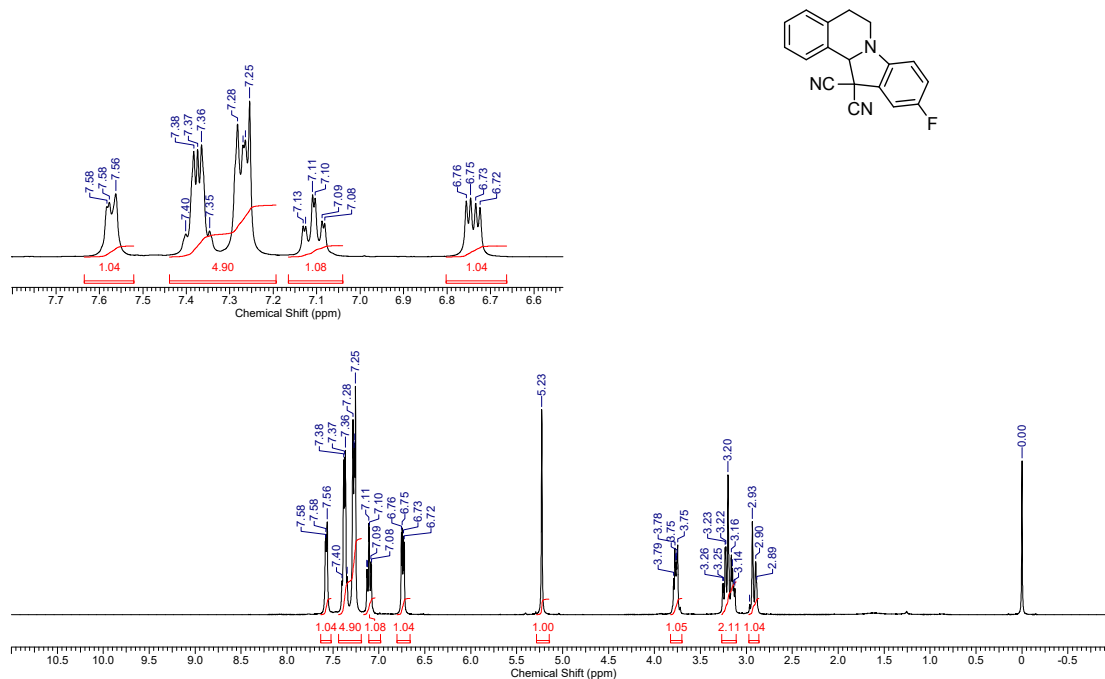

Figure S47. <sup>1</sup>H NMR spectrum of compound 4e

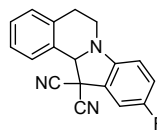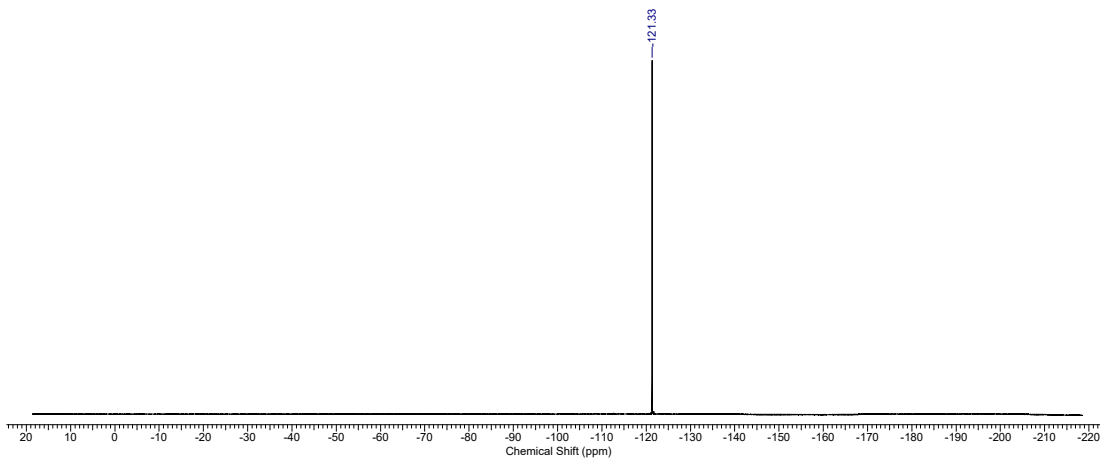Figure S48.  $^{19}\text{F}$  NMR spectrum of compound **4e**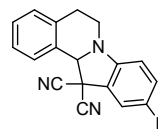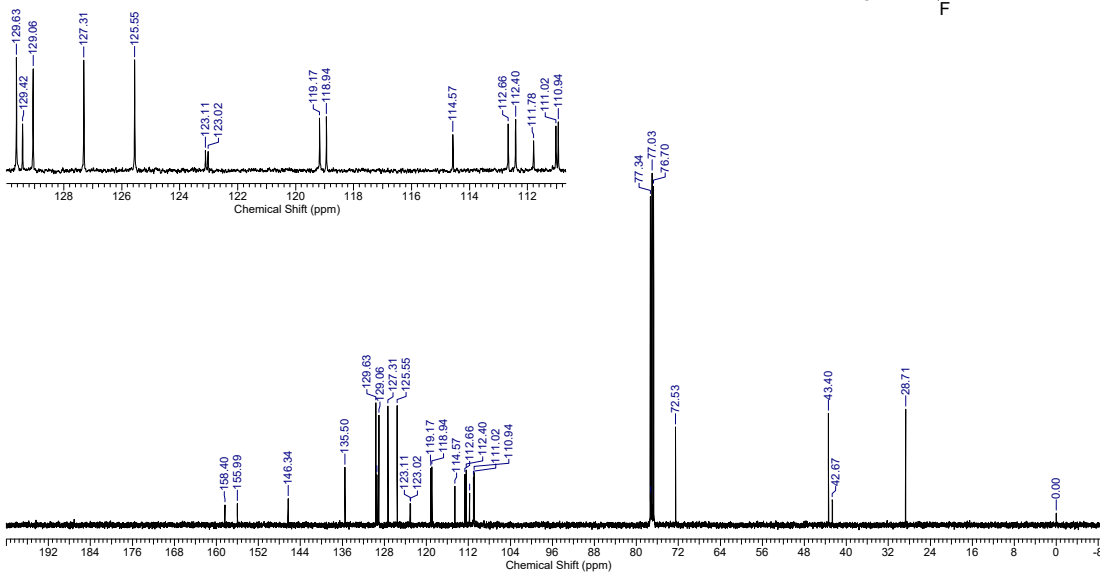Figure S49.  $^{13}\text{C}$  NMR spectrum of compound **4e**

10250-GM-551-1.esp  
10250-GM-551-1.esp

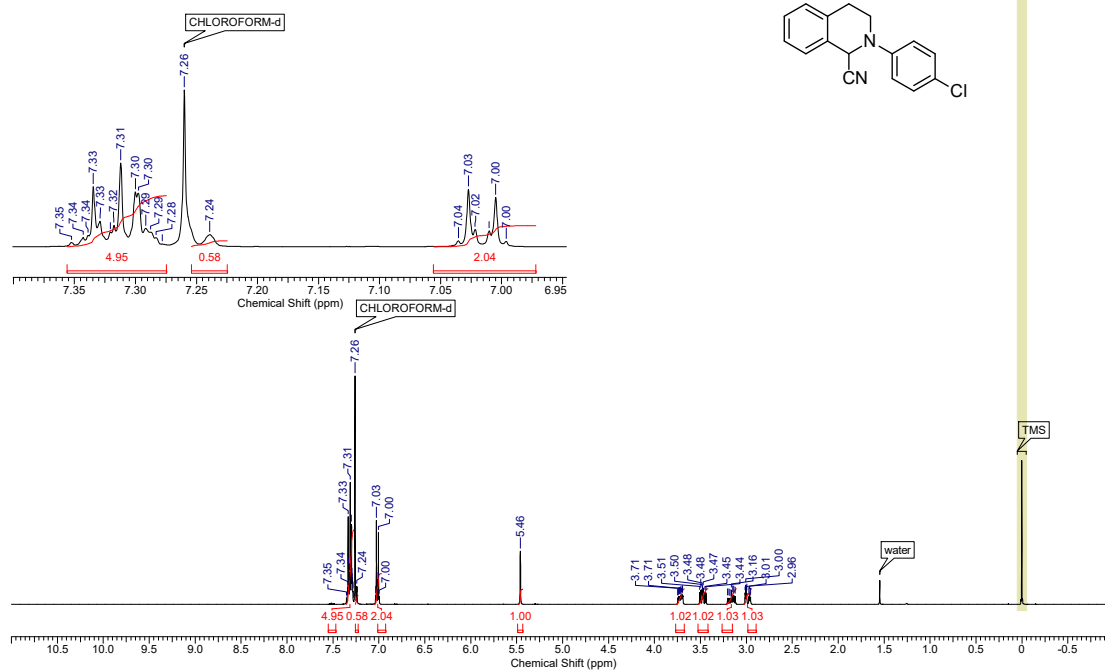

Figure S50. <sup>1</sup>H NMR spectrum of compound 3f

10131-GM551-1-13C.esp  
10131-GM551-1-13C.esp

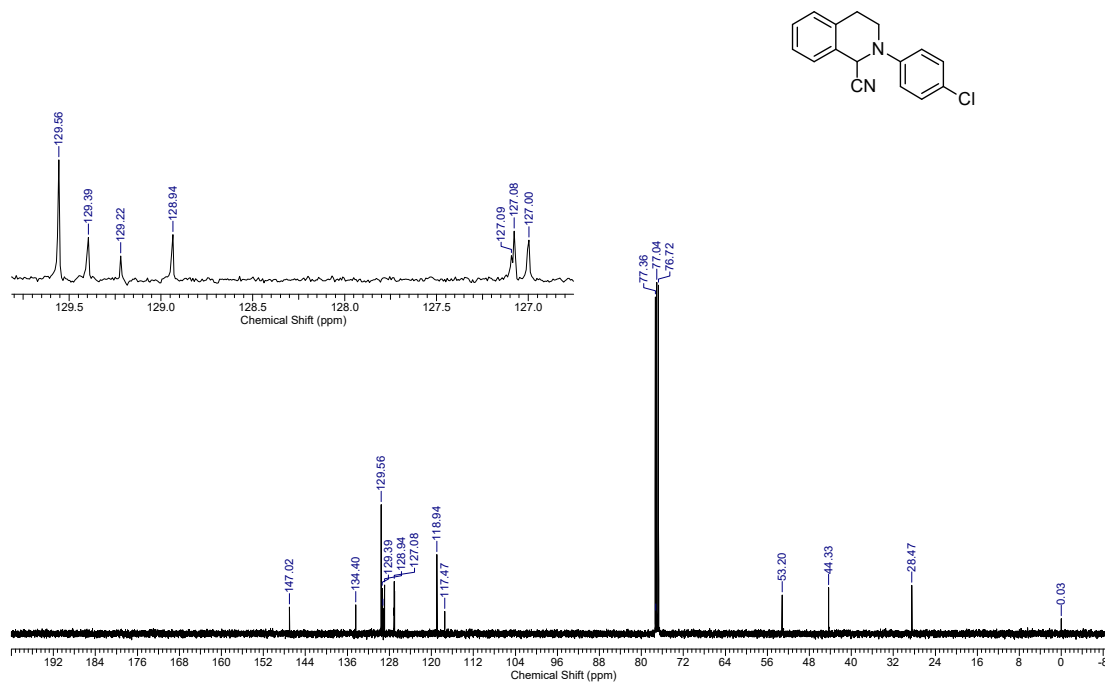

Figure S51. <sup>13</sup>C NMR spectrum of compound 3f



10120-GM488-2.esp  
10120-GM488-2.esp

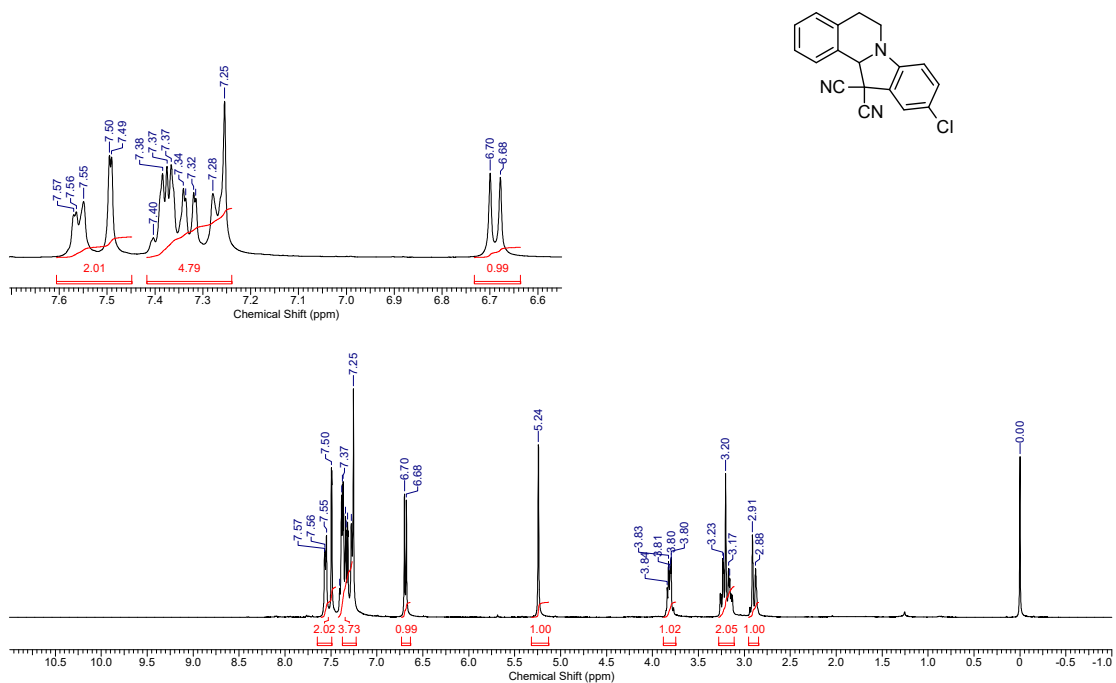

Figure S52. <sup>1</sup>H NMR spectrum of compound 4f

9572-GM488-2-13C.esp  
9572-GM488-2-13C.esp

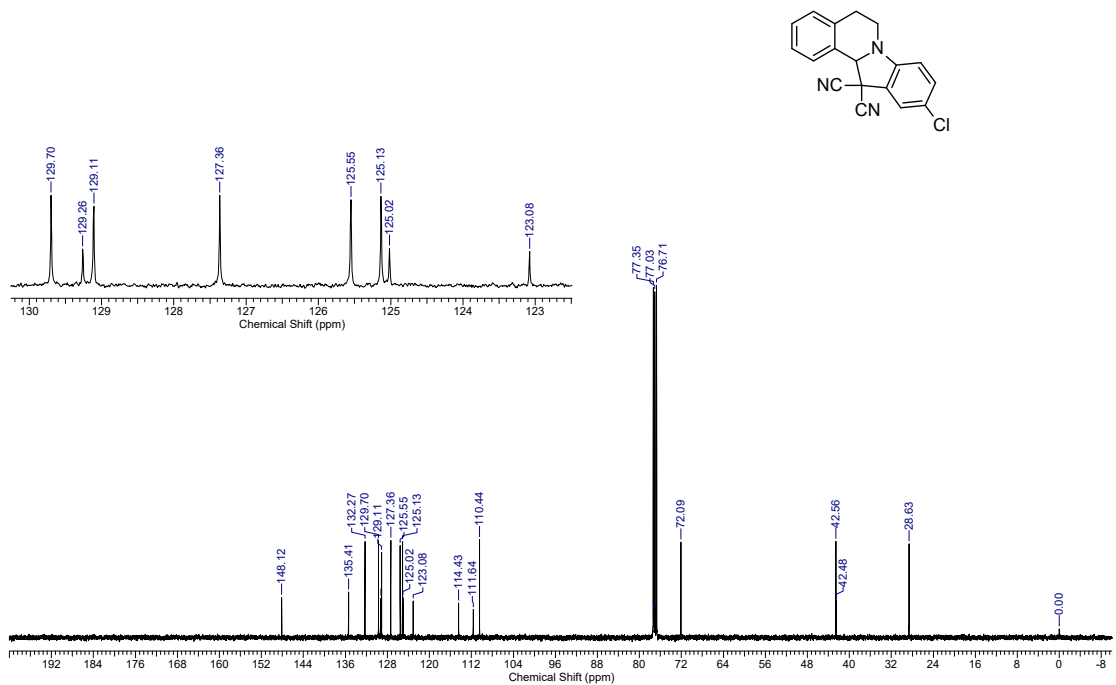

Figure S53. <sup>13</sup>C NMR spectrum of compound 4f

130-GM556-1.esp  
130-GM556-1.esp

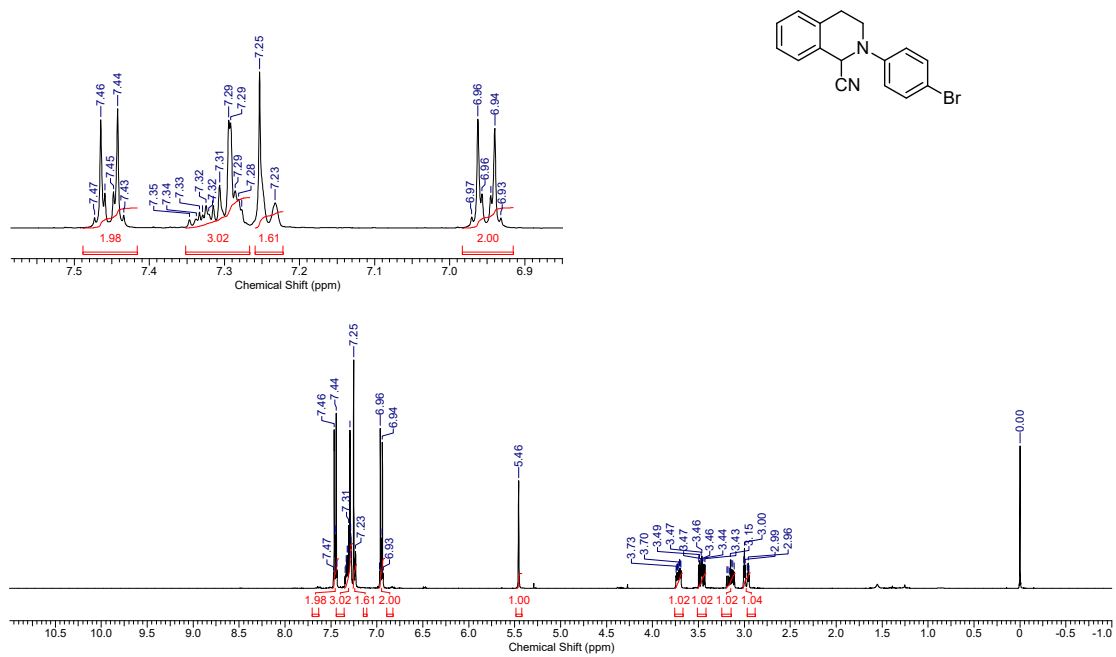

Figure S54. <sup>1</sup>H NMR spectrum of compound 3g

132-GM556-1-13C.esp  
132-GM556-1-13C.esp

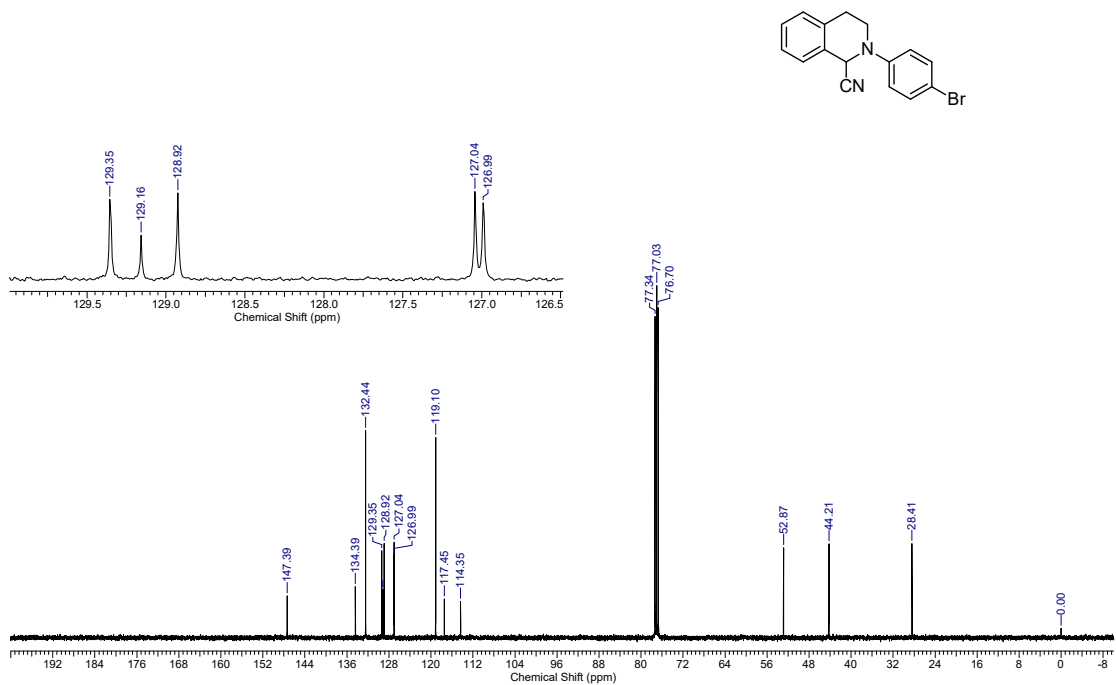

Figure S55. <sup>13</sup>C NMR spectrum of compound 3g

9610-GM475-2r.esp  
9610-GM475-2r.esp

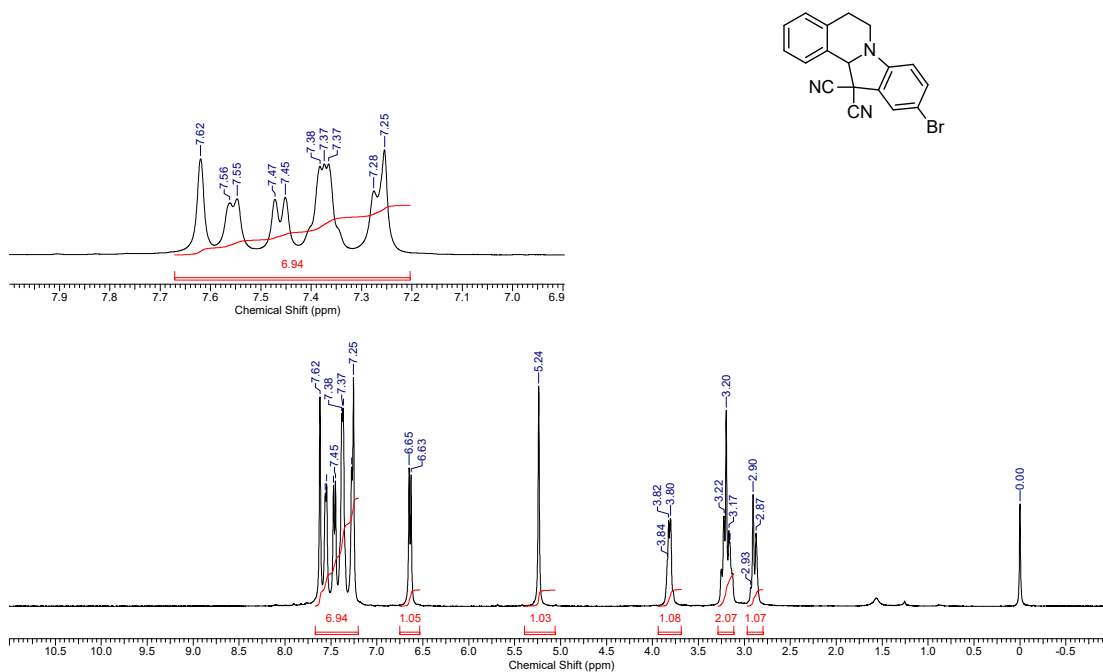

Figure S56. <sup>1</sup>H NMR spectrum of compound 4g

9611-GM475-2-13C.esp  
9611-GM475-2-13C.esp

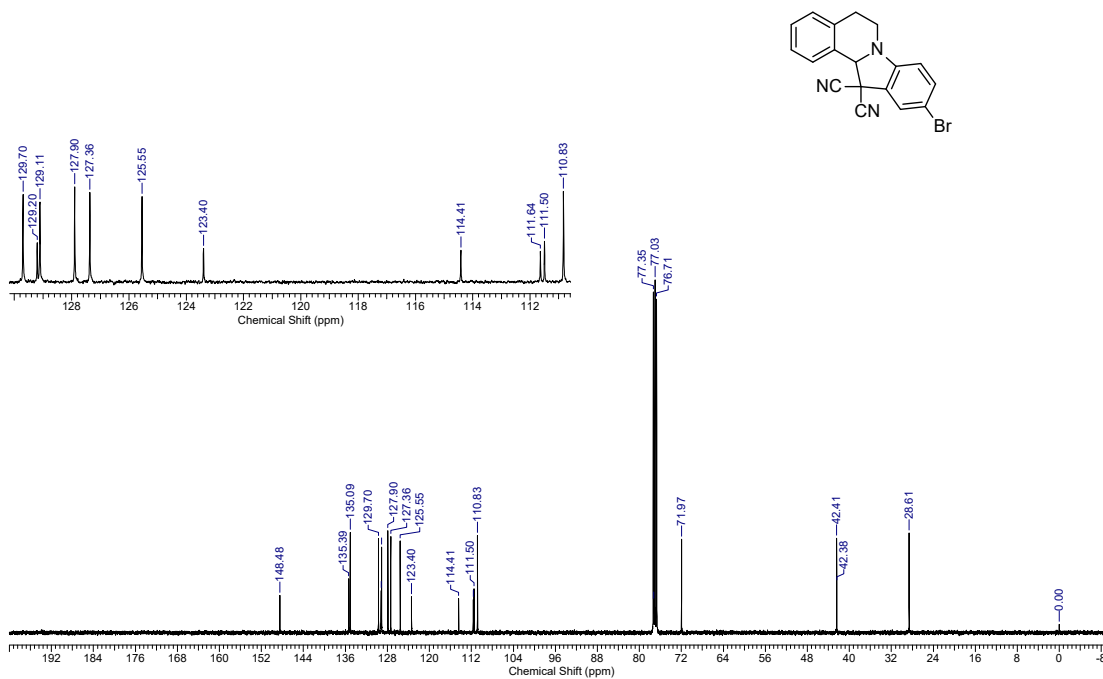

Figure S57. <sup>13</sup>C NMR spectrum of compound 4g

10000-GM477-2.esp  
10000-GM477-2.esp

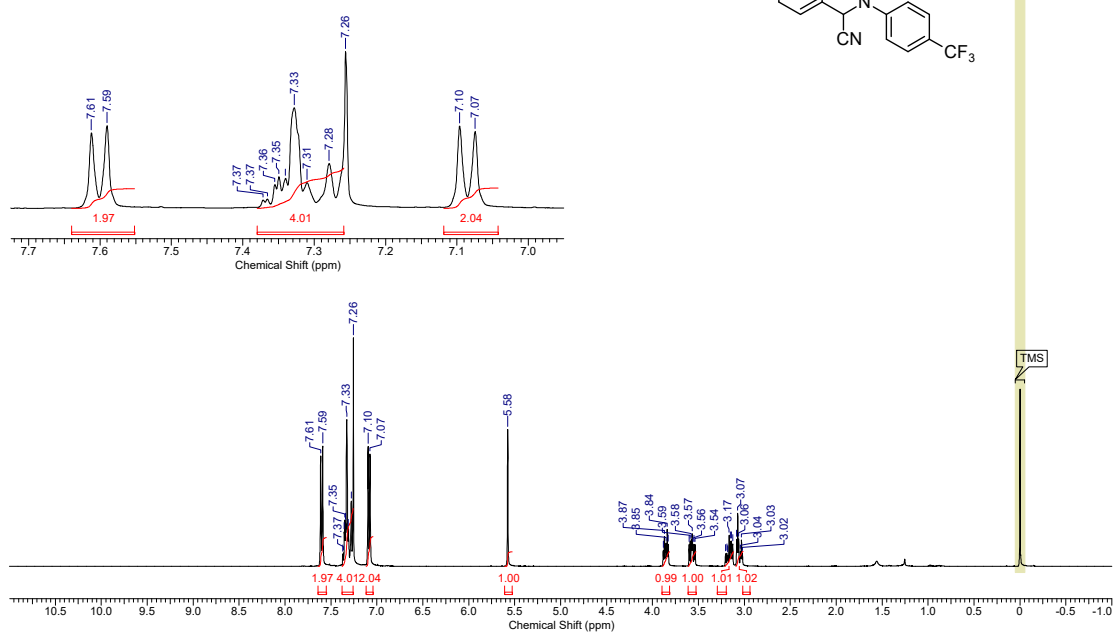

Figure S58. <sup>1</sup>H NMR spectrum of compound 3h

10001-GM477-2-19F.esp

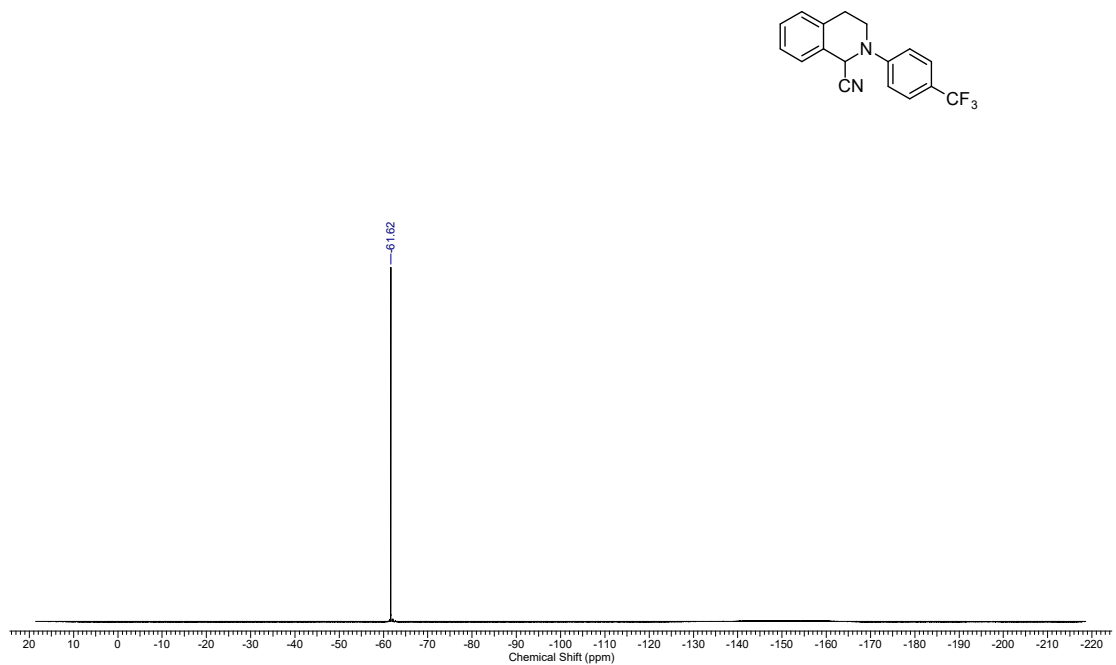

Figure S59. <sup>19</sup>F NMR spectrum of compound 3h

10002-GM477-2-13C.esp  
10002-GM477-2-13C.esp

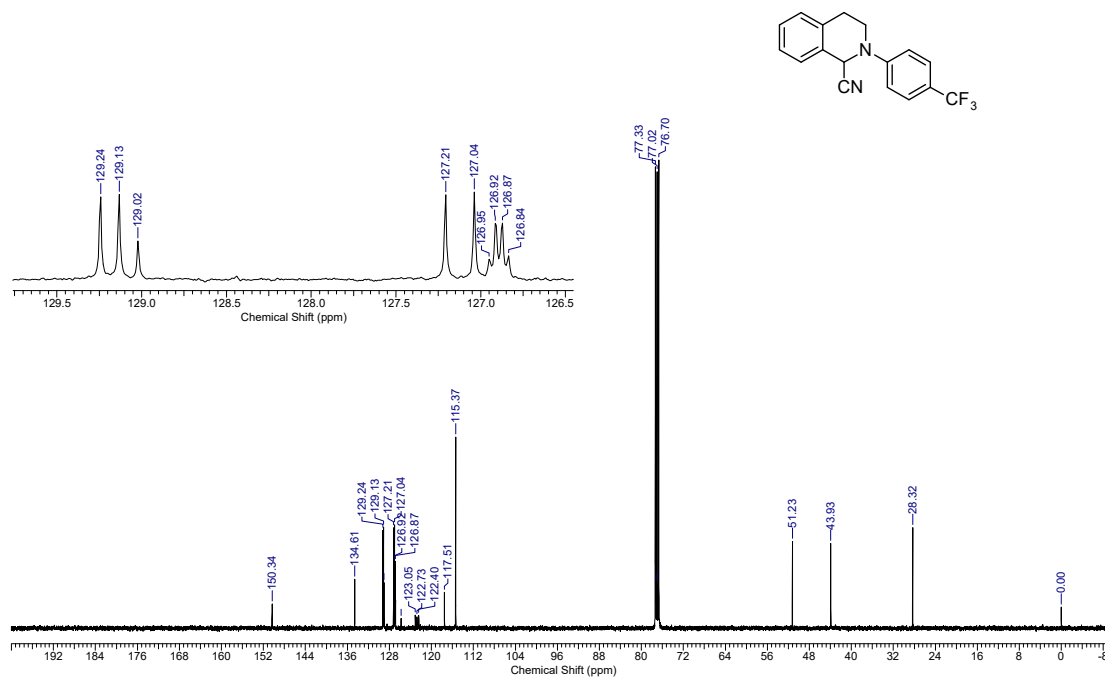

Figure S60. <sup>13</sup>C NMR spectrum of compound 3h

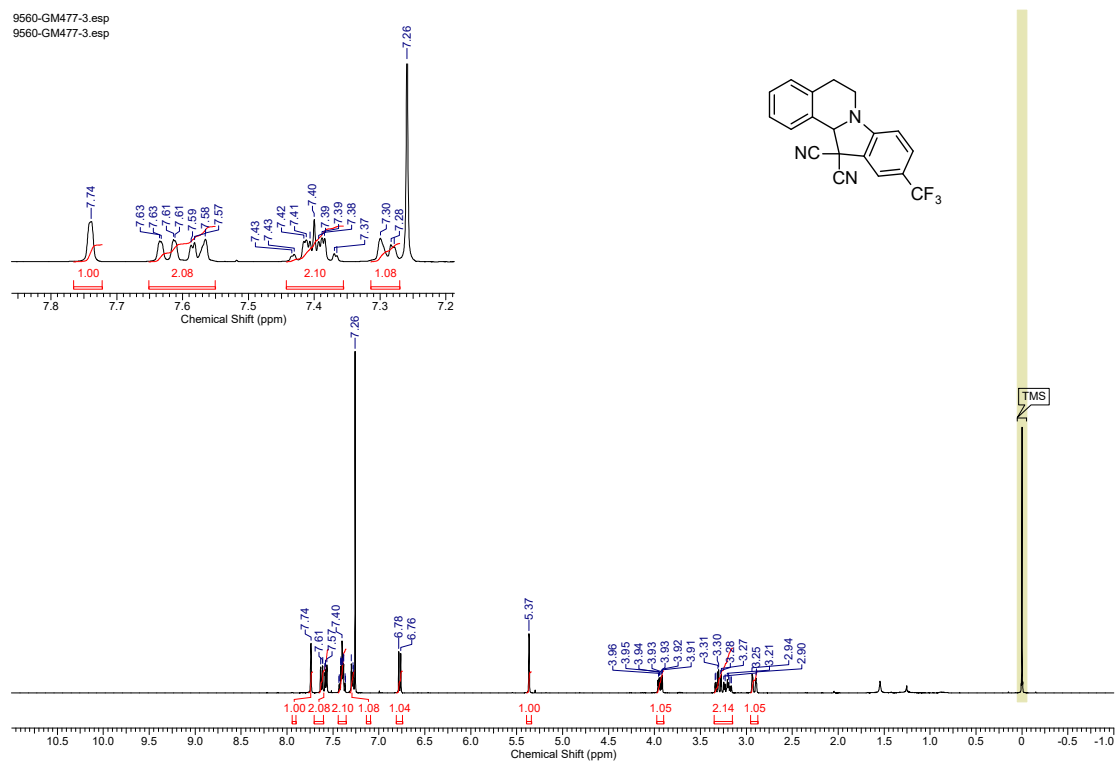

Figure S61. <sup>1</sup>H NMR spectrum of compound 4h

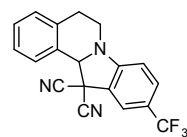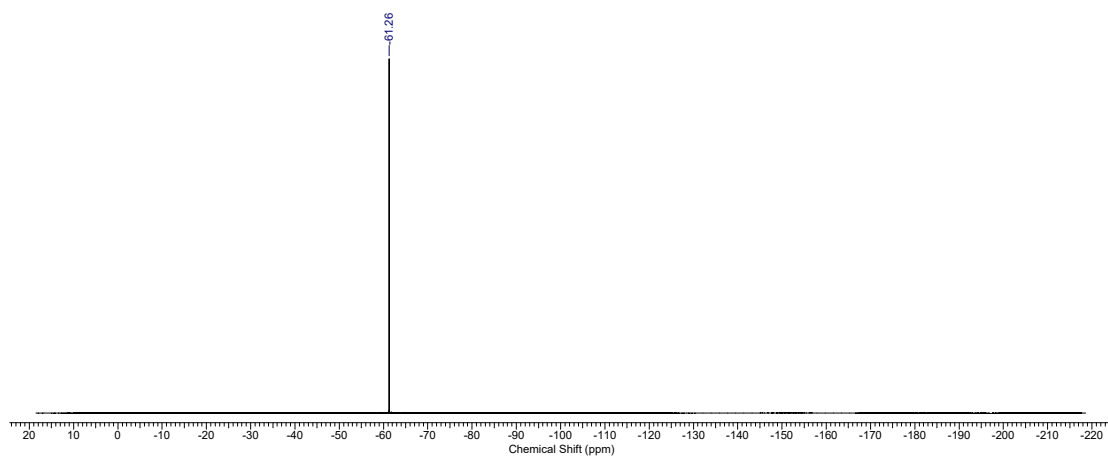Figure S62.  $^{19}\text{F}$  NMR spectrum of compound **4h**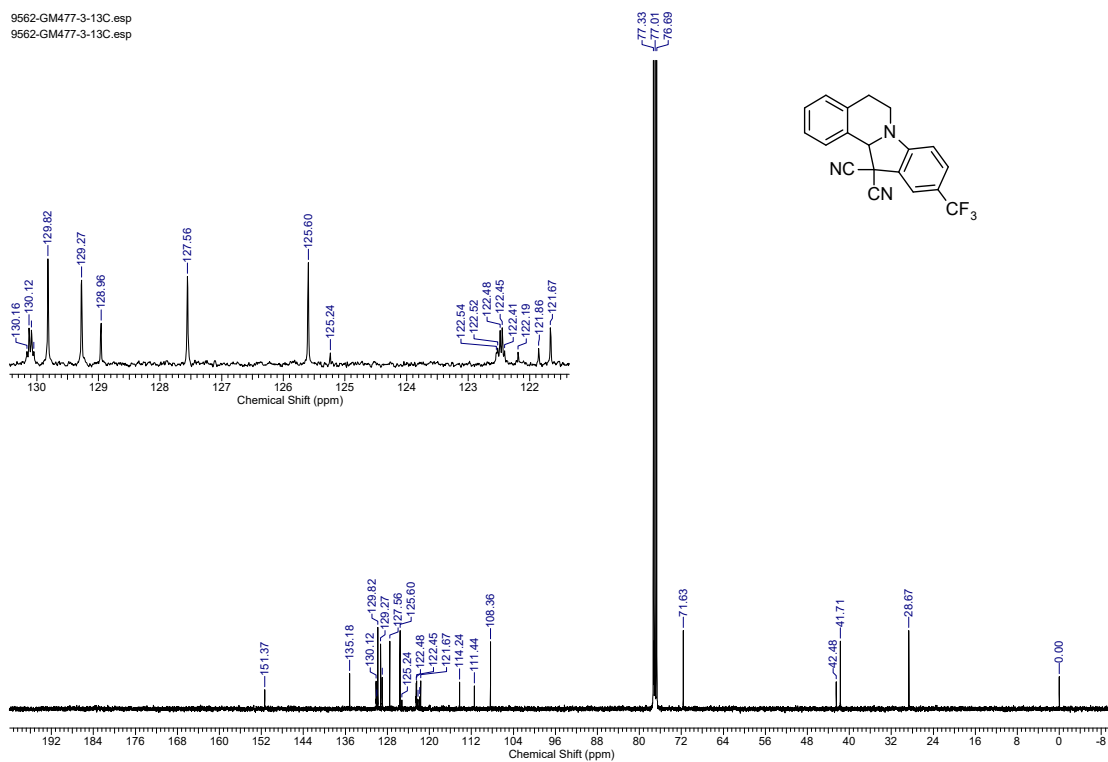Figure S63.  $^{13}\text{C}$  NMR spectrum of compound **4h**

770-GM503.esp  
770-GM503.esp

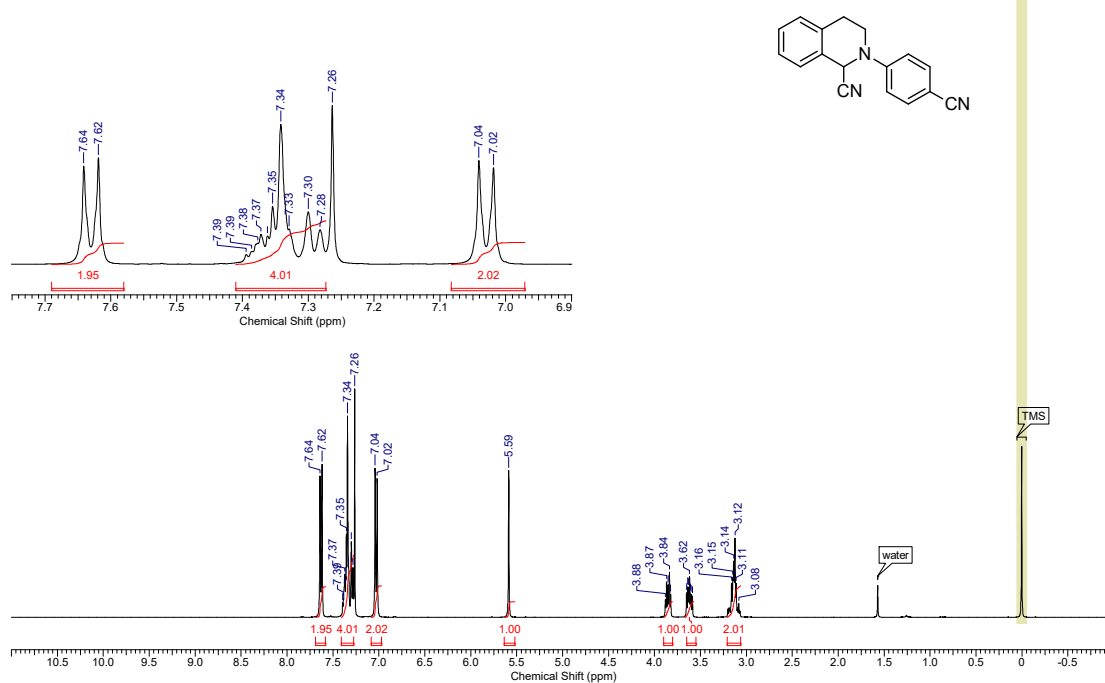

Figure S64. <sup>1</sup>H NMR spectrum of compound 3i

771-GM503-13C.esp  
771-GM503-13C.esp

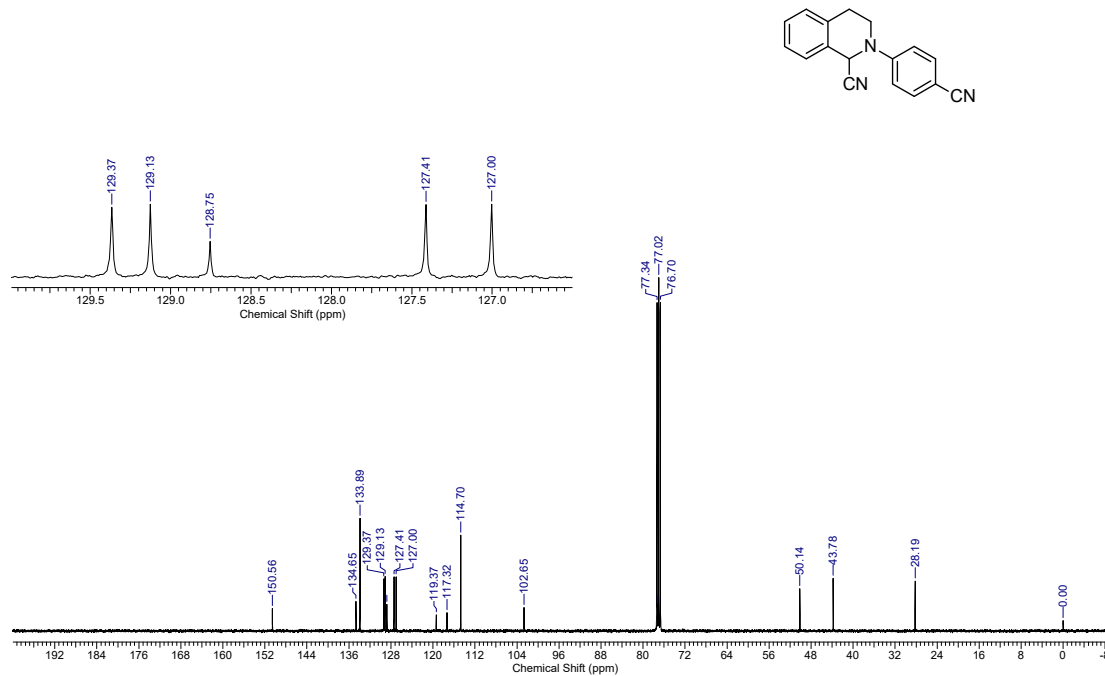

Figure S65. <sup>13</sup>C NMR spectrum of compound 3i

630-GM559-1.esp  
630-GM559-1.esp

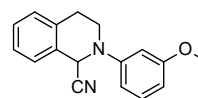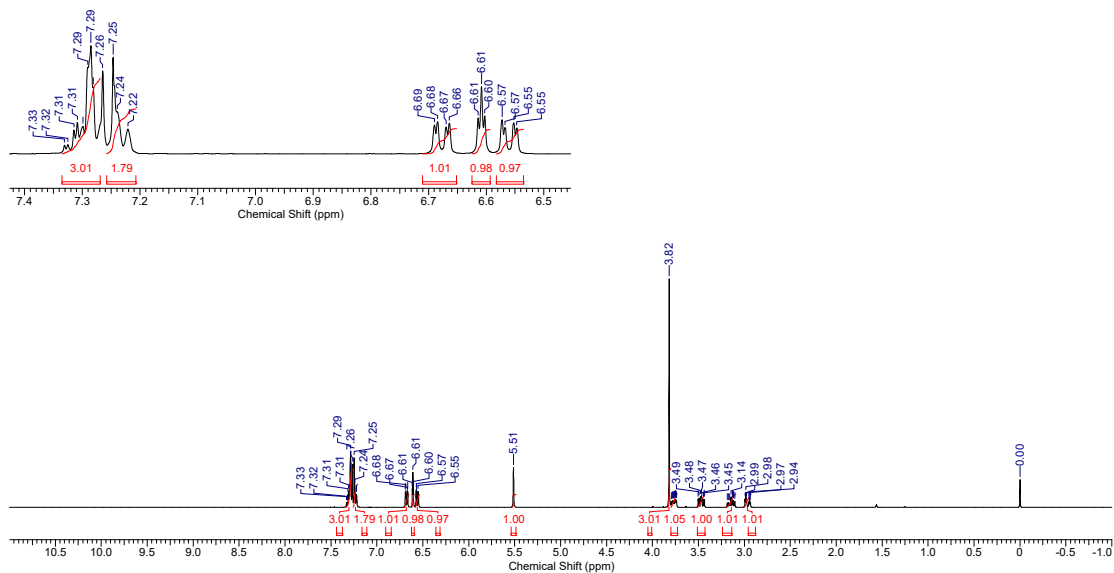

Figure S66. <sup>1</sup>H NMR spectrum of compound 3j

631-GM559-1-13C.esp  
631-GM559-1-13C.esp

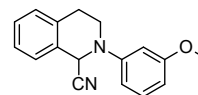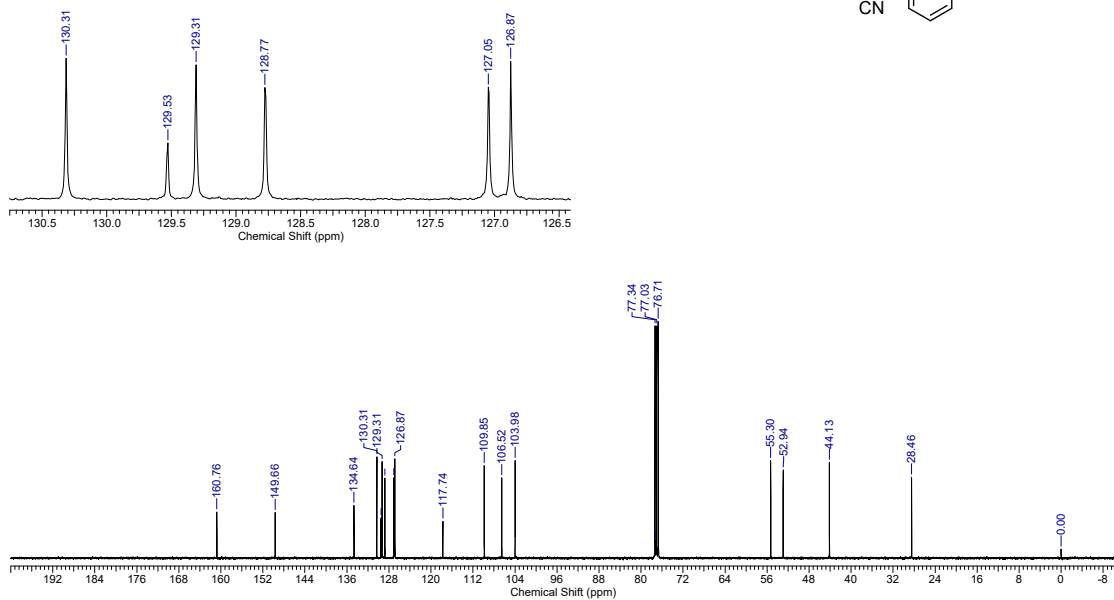

Figure S67. <sup>13</sup>C NMR spectrum of compound 3j



1200-GM505-3.esp

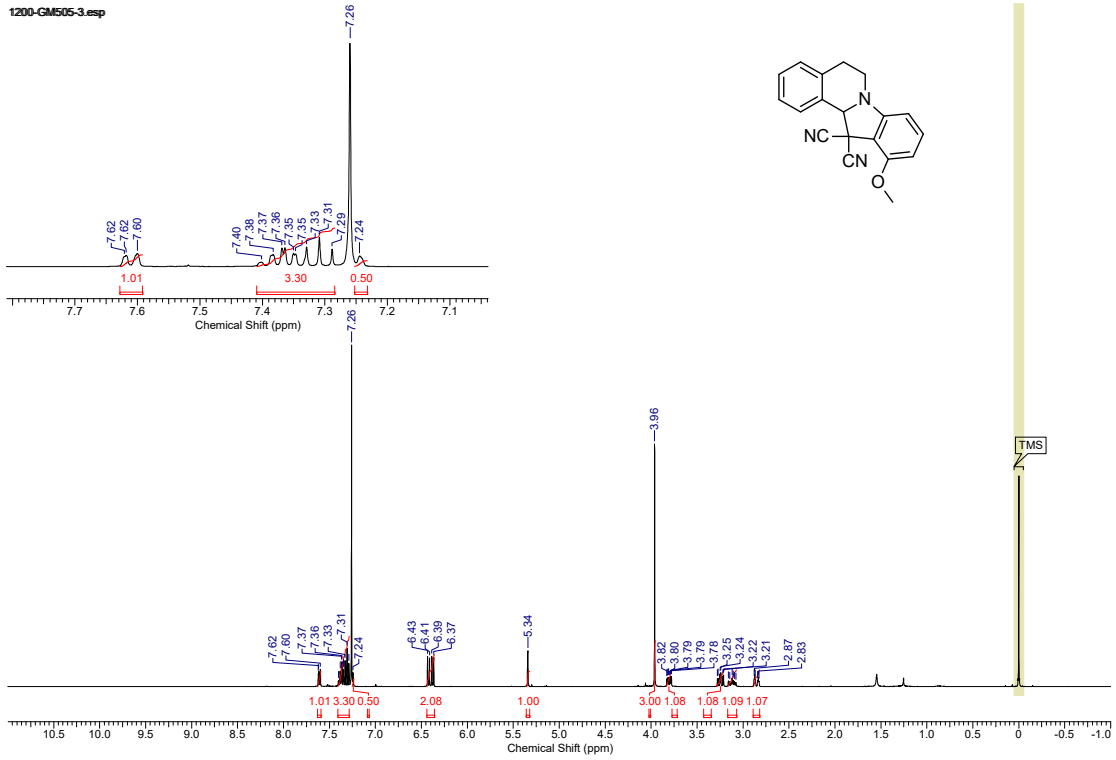

Figure S68. <sup>1</sup>H NMR spectrum of compound 4j1

4851-GM-505-3-13C.esp  
4851-GM-505-3-13C.esp

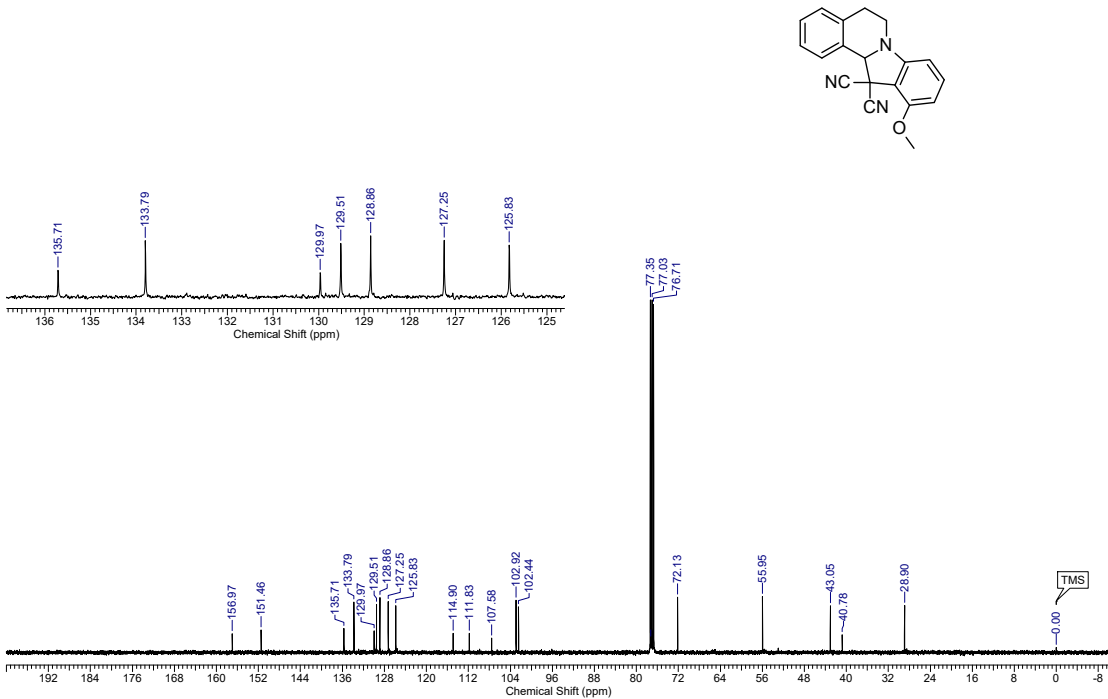

Figure S69. <sup>13</sup>C NMR spectrum of compound 4j1

1270-GM505-7.esp  
1270-GM505-7.esp

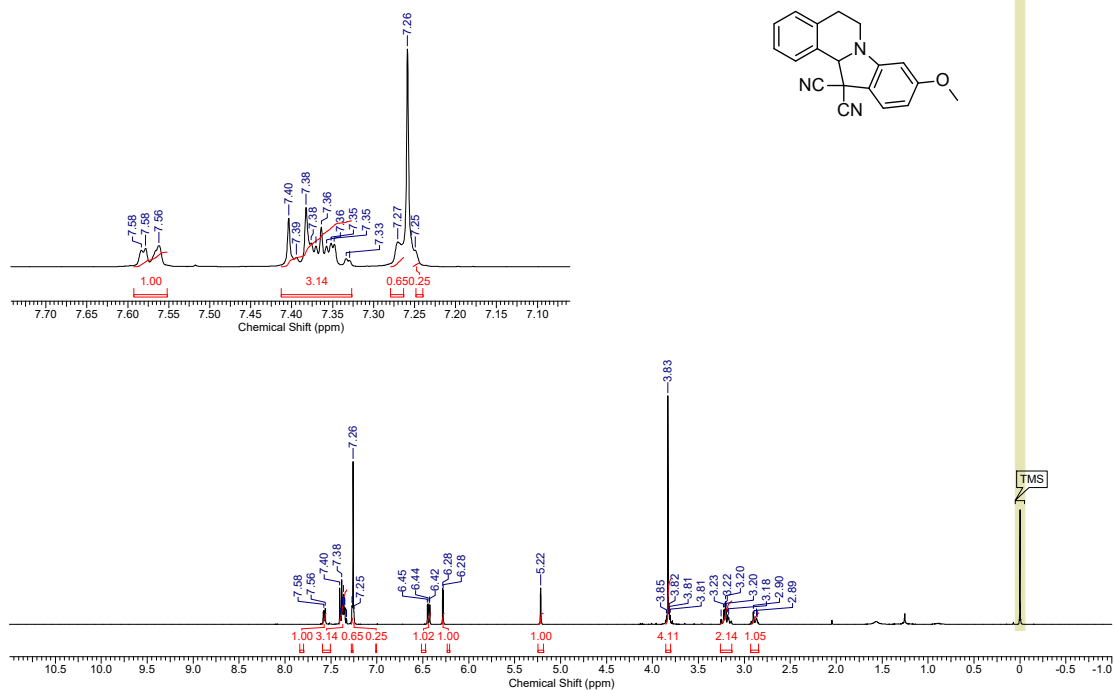

Figure S70. <sup>1</sup>H NMR spectrum of compound 4j2

4871-GM-505-5-13C.esp  
4871-GM-505-5-13C.esp

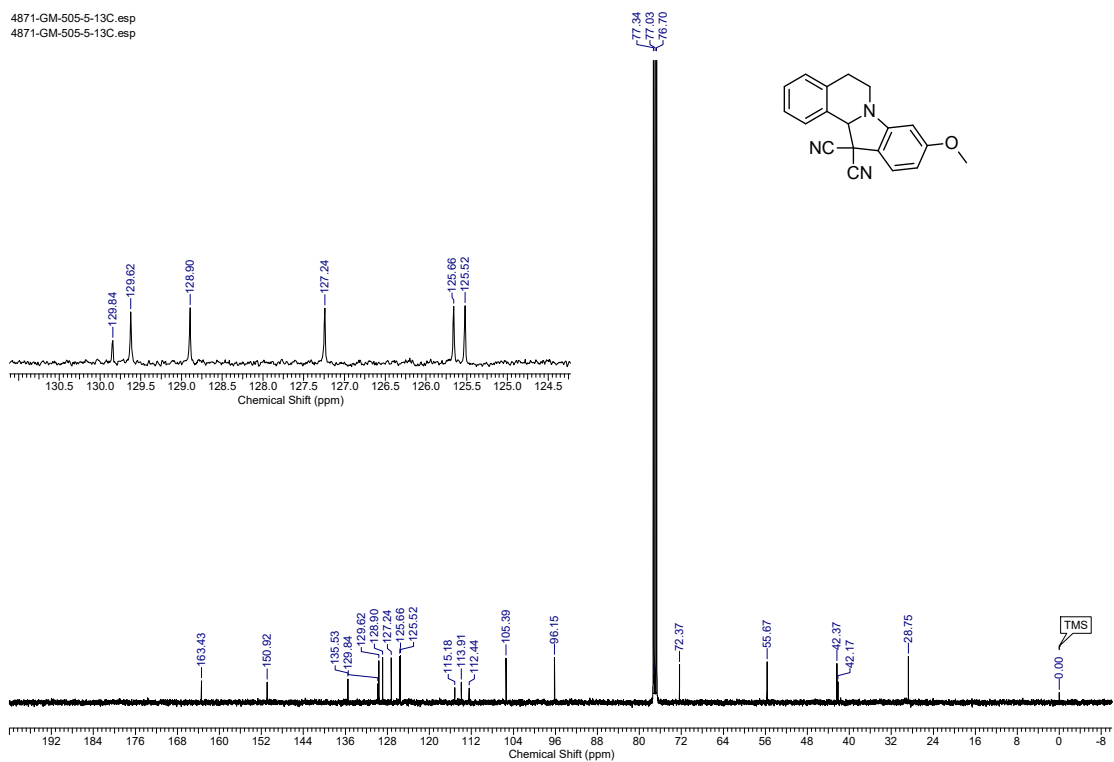

Figure S71. <sup>13</sup>C NMR spectrum of compound 4j2

9900-GM550-1.esp  
9900-GM550-1.esp

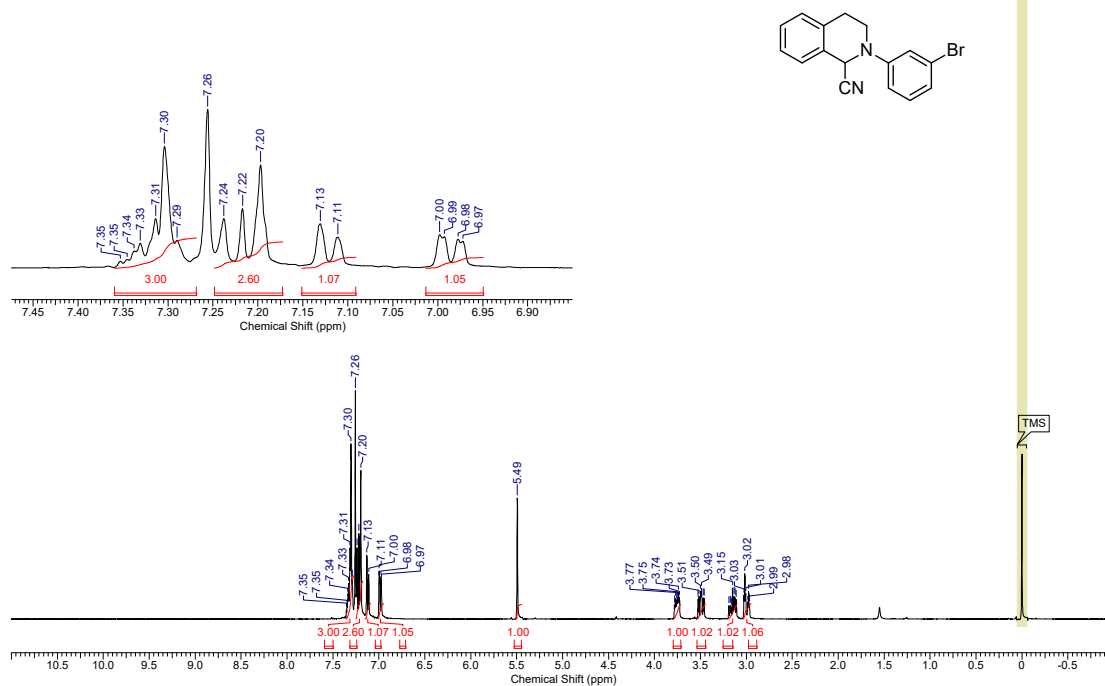

Figure S72.  $^1\text{H}$  NMR spectrum of compound 3k

9901-GM550-1-13C.esp  
9901-GM550-1-13C.esp

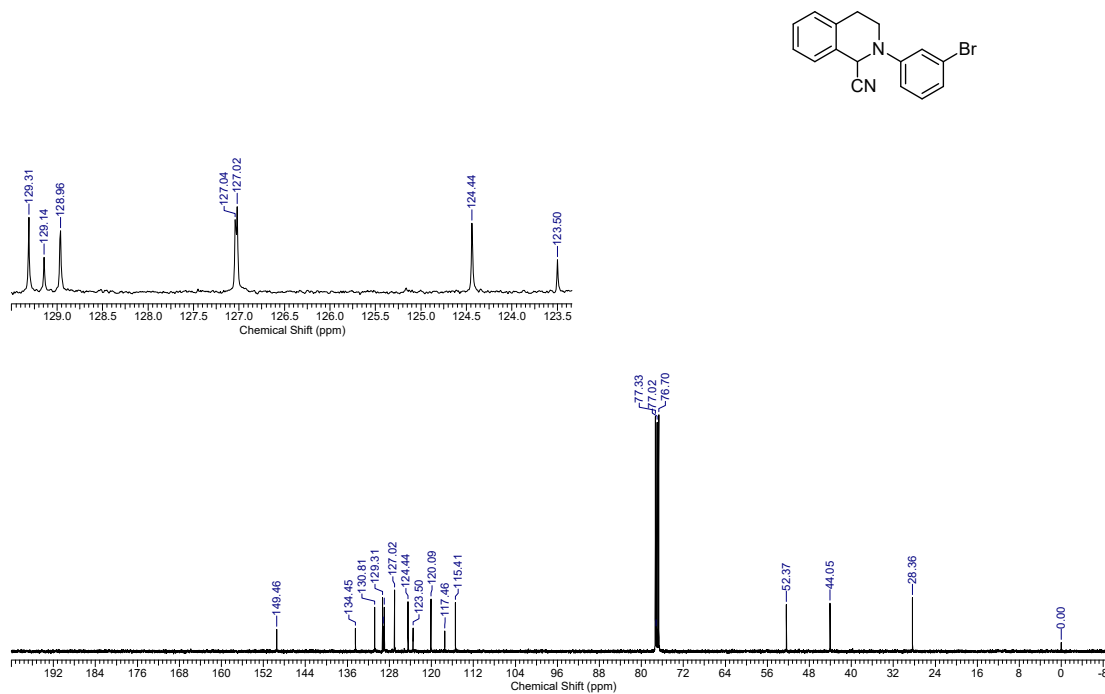

Figure S73.  $^{13}\text{C}$  NMR spectrum of compound 3k

1260-GM499-2-2\_000001r  
1260-GM499-2-2\_000001r

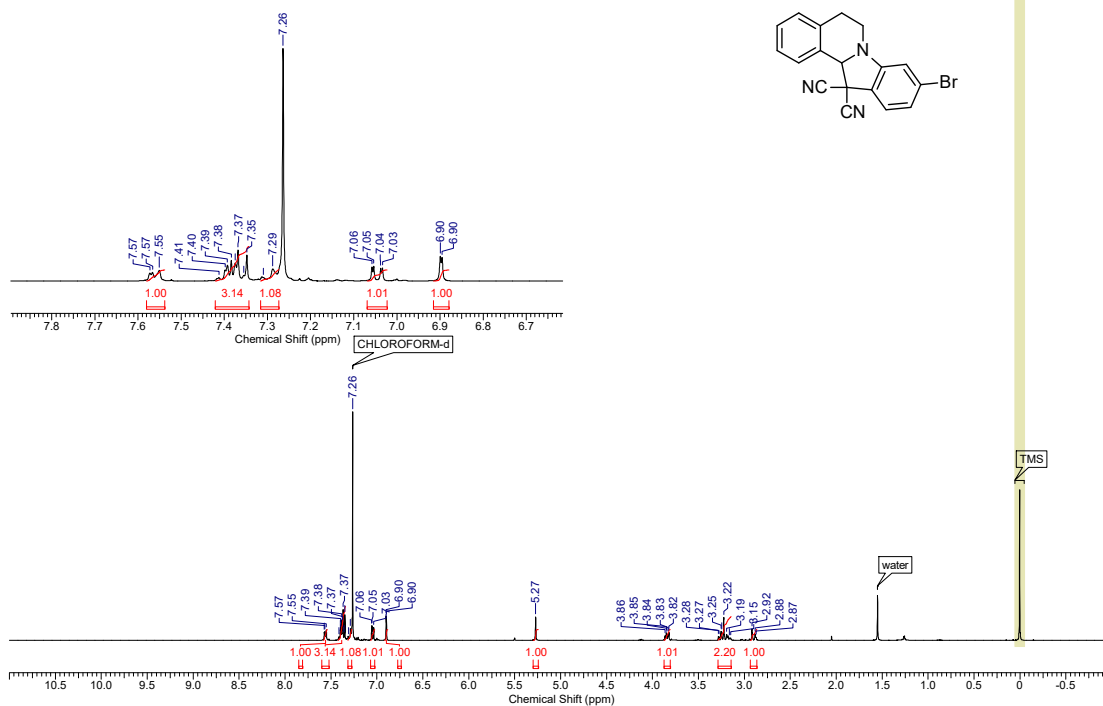

Figure S74.  $^1\text{H}$  NMR spectrum of compound 4k1

1261-GM499-2-2-13C.esp  
1261-GM499-2-2-13C.esp

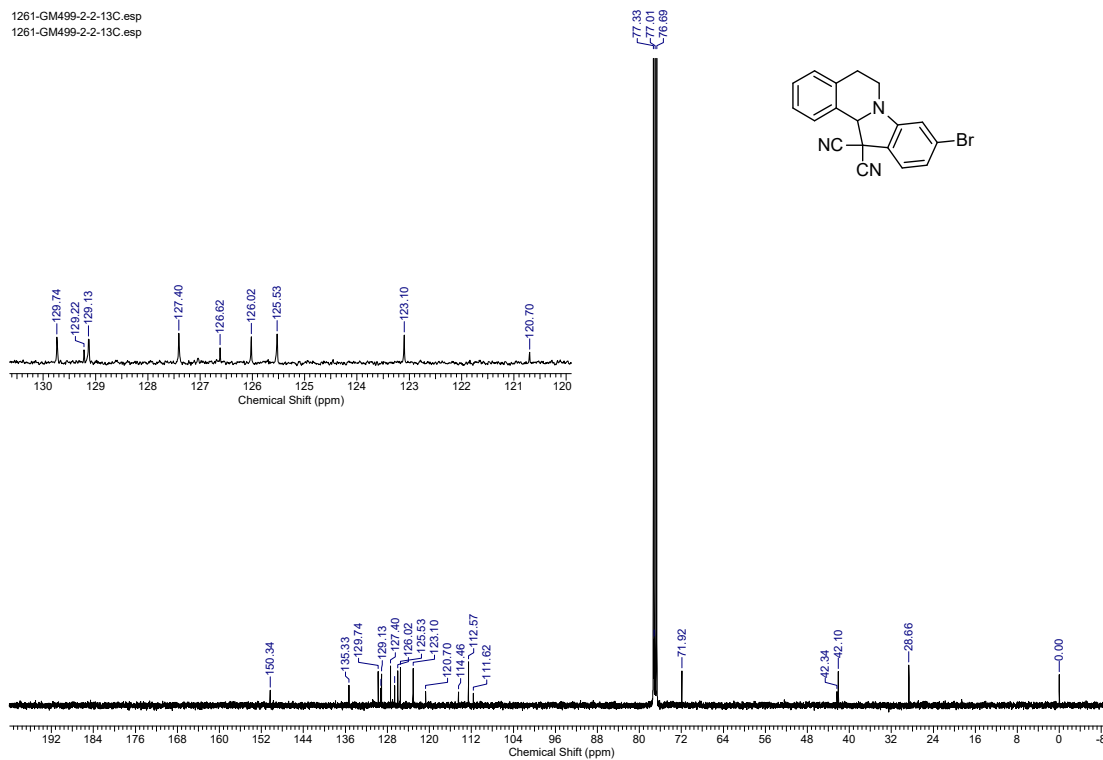

Figure S75.  $^{13}\text{C}$  NMR spectrum of compound 4k1

10-GM499-4.esp  
10-GM499-4.esp

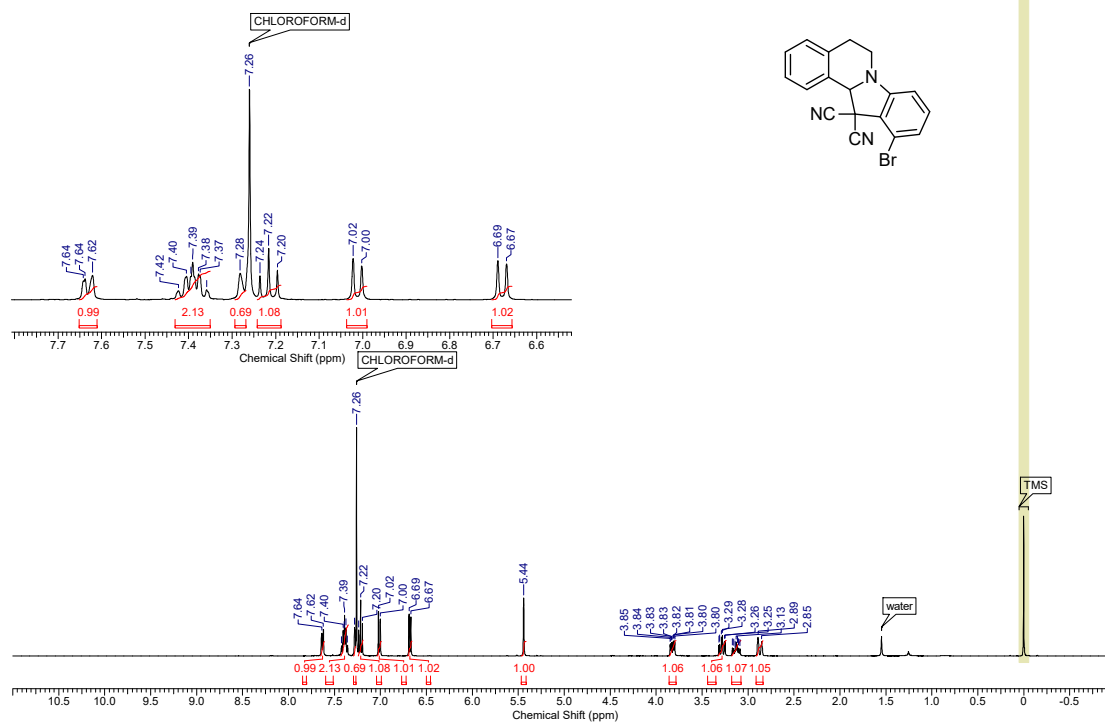

Figure S76.  $^1\text{H}$  NMR spectrum of compound 4k2

11-GM499-4-13C.esp  
11-GM499-4-13C.esp

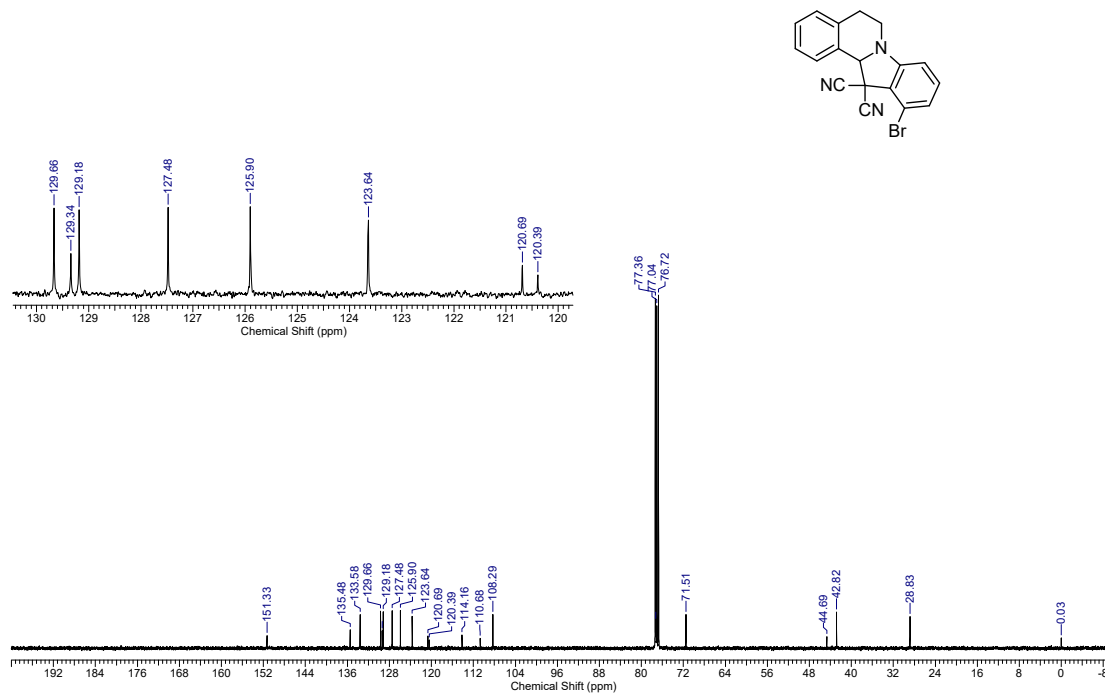

Figure S77.  $^{13}\text{C}$  NMR spectrum of compound 4k2

290-GM558-1.esp  
290-GM558-1.esp

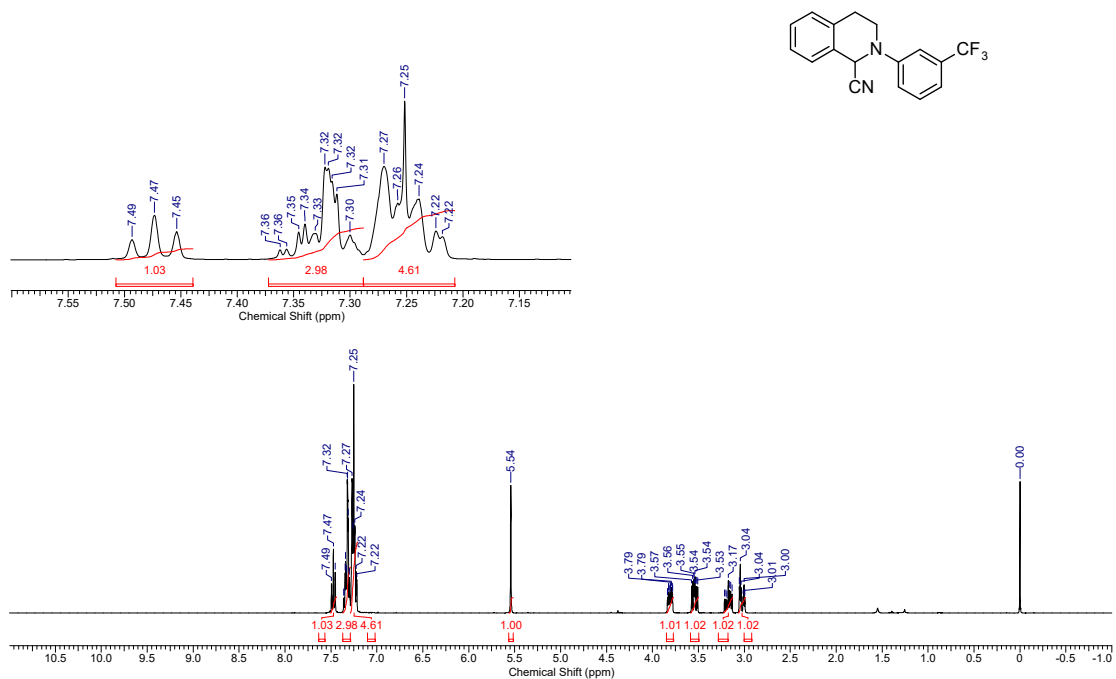

Figure S78. <sup>1</sup>H NMR spectrum of compound 31

291-GM558-1-19F.esp

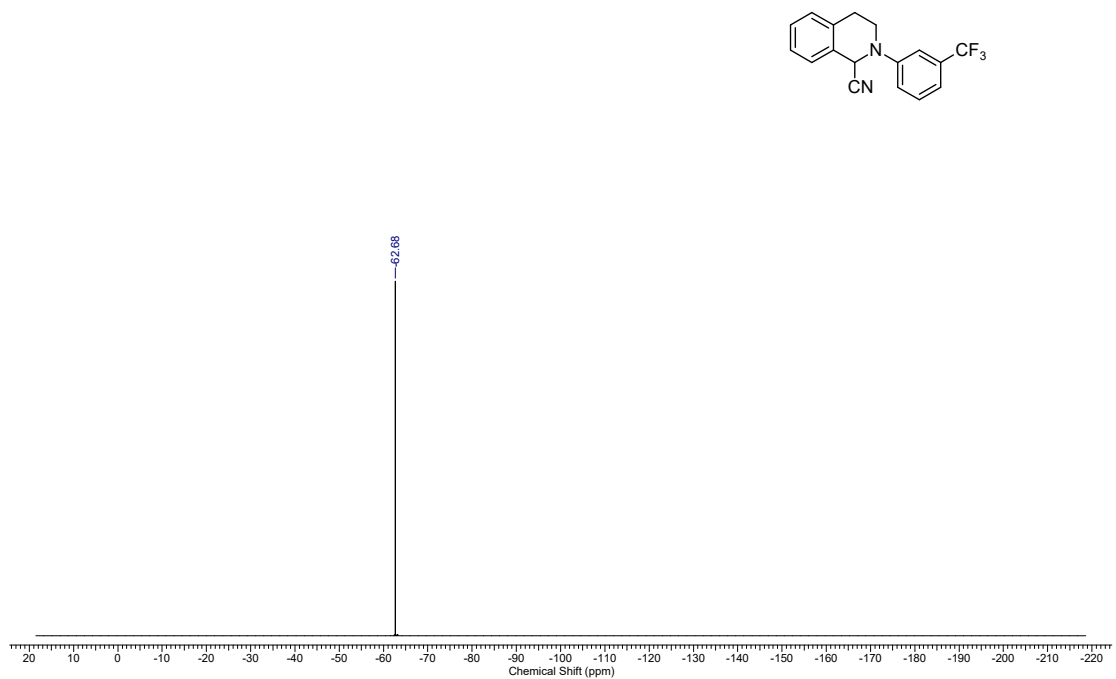

Figure S79. <sup>19</sup>F NMR spectrum of compound 31

292-GM558-1-13C.esp  
292-GM558-1-13C.esp

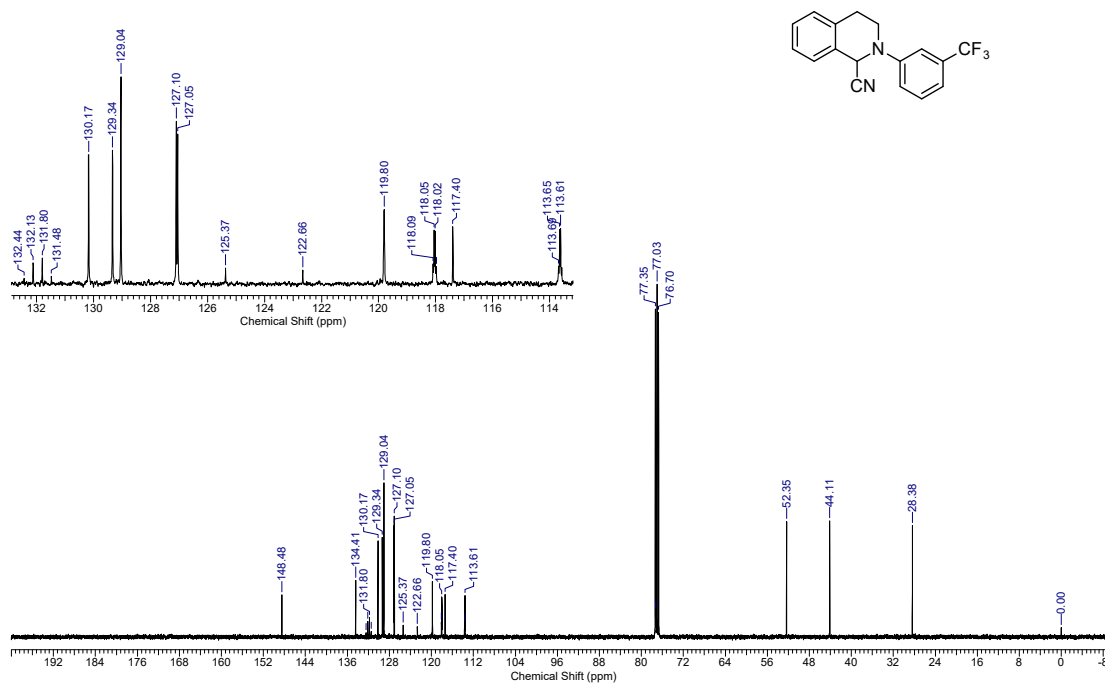

Figure S80. <sup>13</sup>C NMR spectrum of compound 31

6520-7900-GM-524-2.esp  
6520-7900-GM-524-2.esp

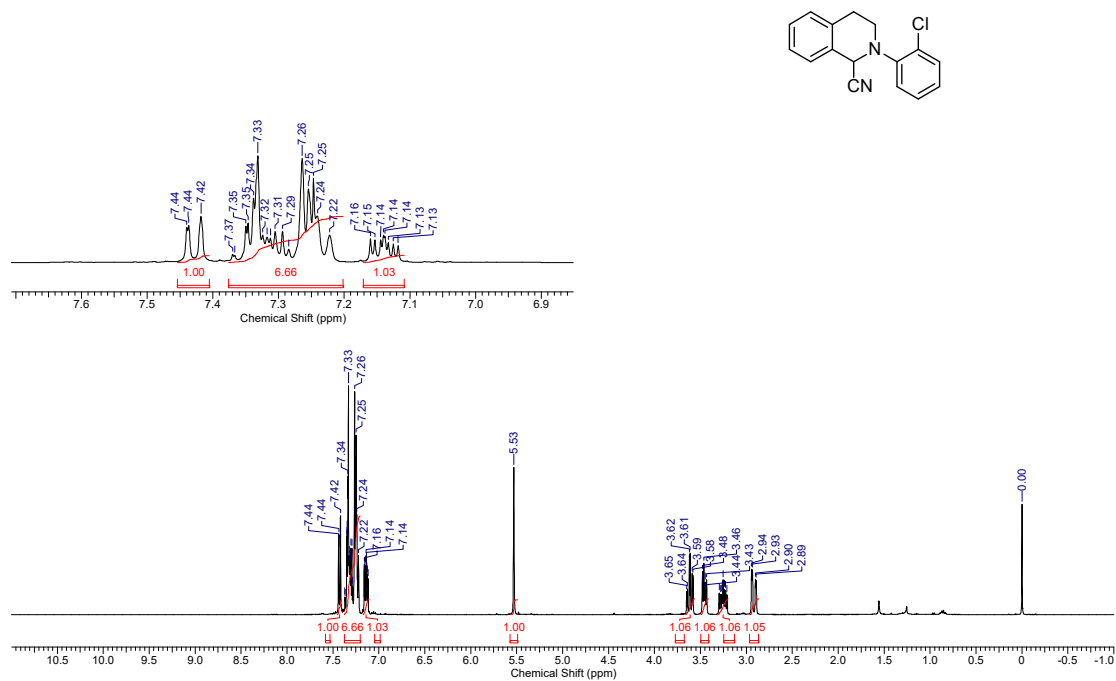

Figure S81. <sup>1</sup>H NMR spectrum of compound 3m

6521-GM524-2-13C.esp  
6521-GM524-2-13C.esp

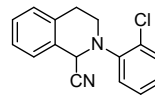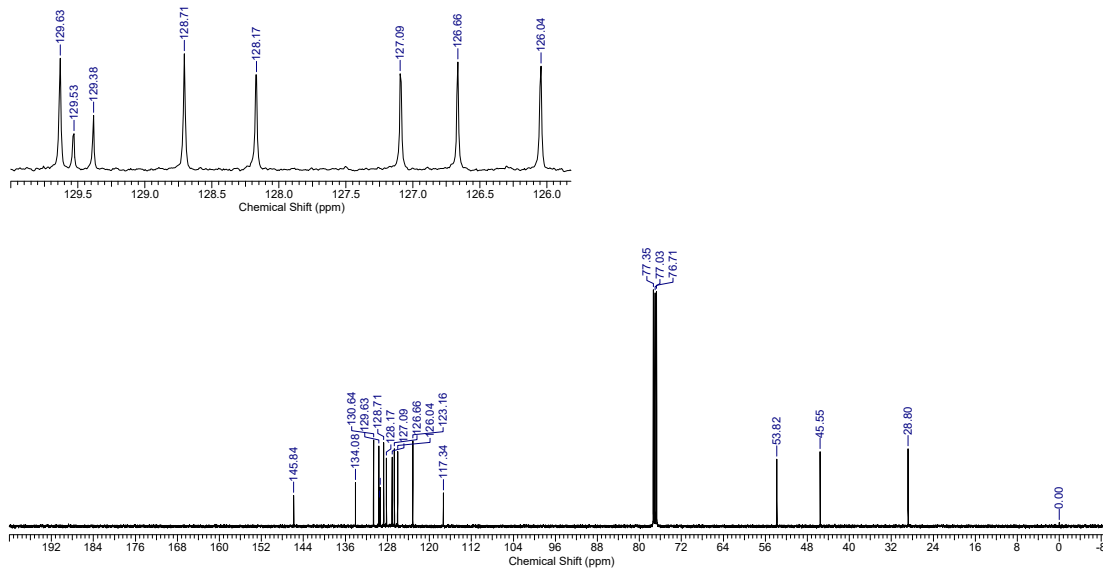

Figure S82. <sup>13</sup>C NMR spectrum of compound 3m

30-GM552-1.esp

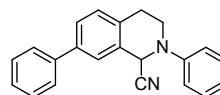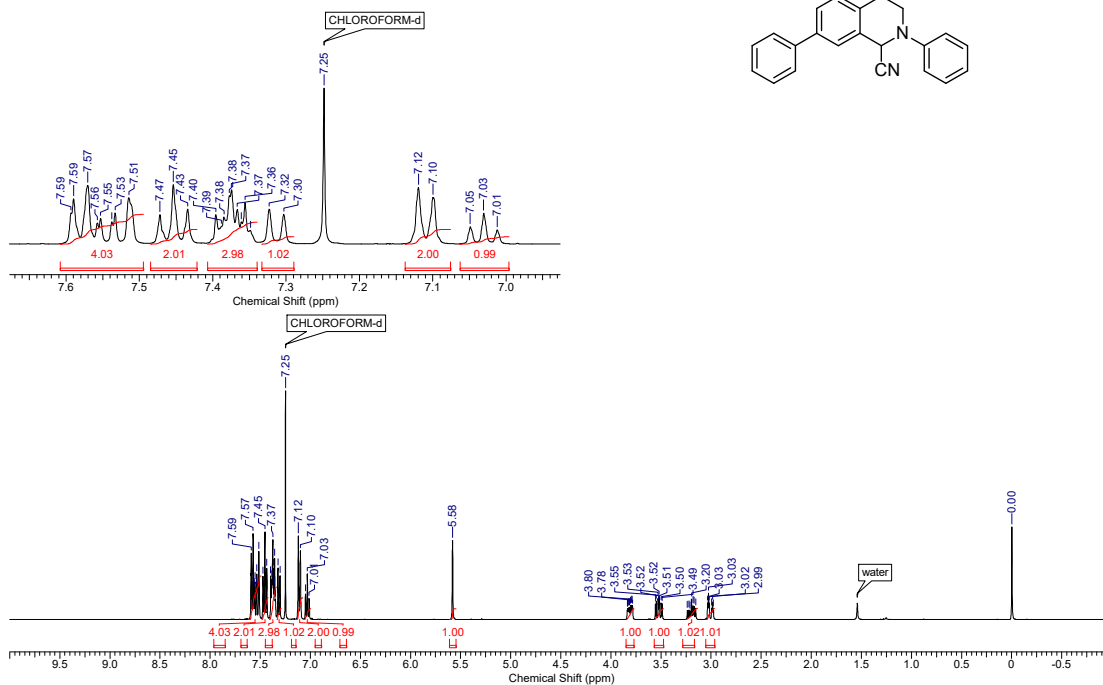

Figure S83. <sup>1</sup>H NMR spectrum of compound 3n



7741-GM537-2-13C.esp  
7741-GM537-2-13C.esp

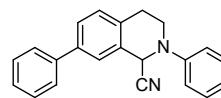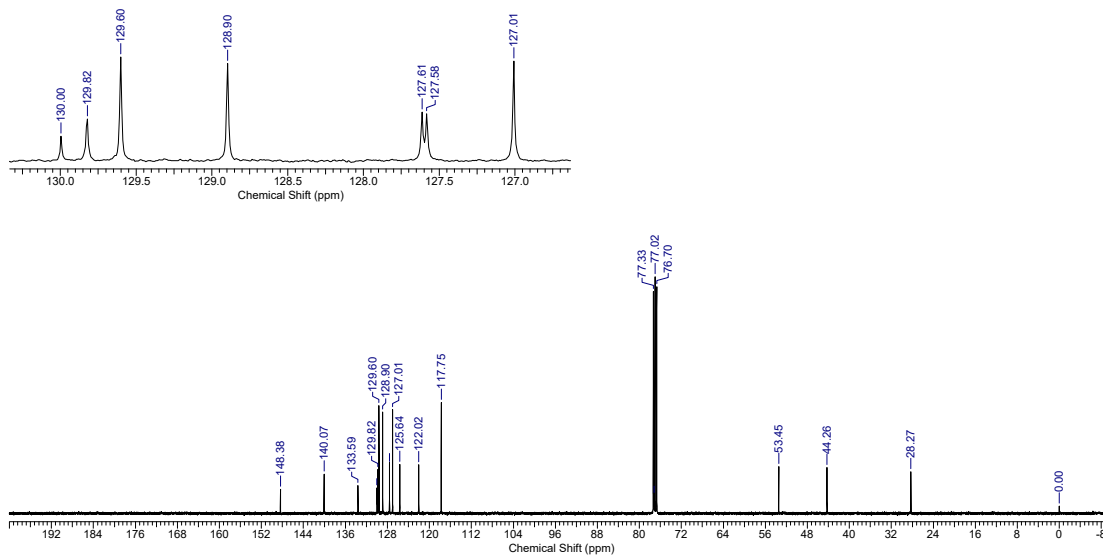

Figure S84. <sup>13</sup>C NMR spectrum of compound 3n

9280-GM537-3.esp  
9280-GM537-3.esp

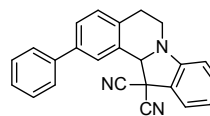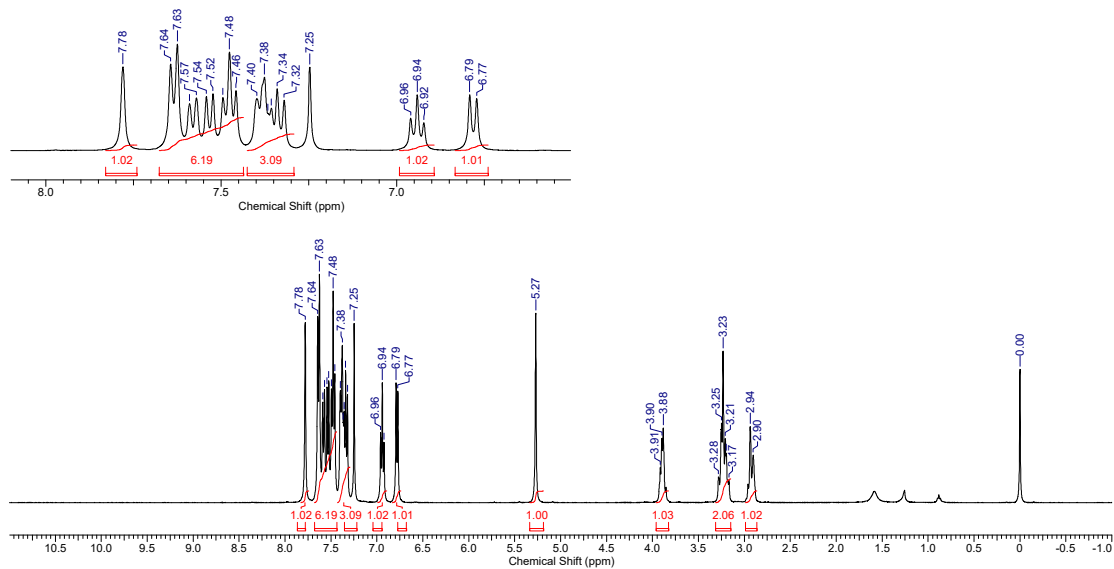

Figure S85. <sup>1</sup>H NMR spectrum of compound 4n

7731-GM537-3-13C.esp  
7731-GM537-3-13C.esp

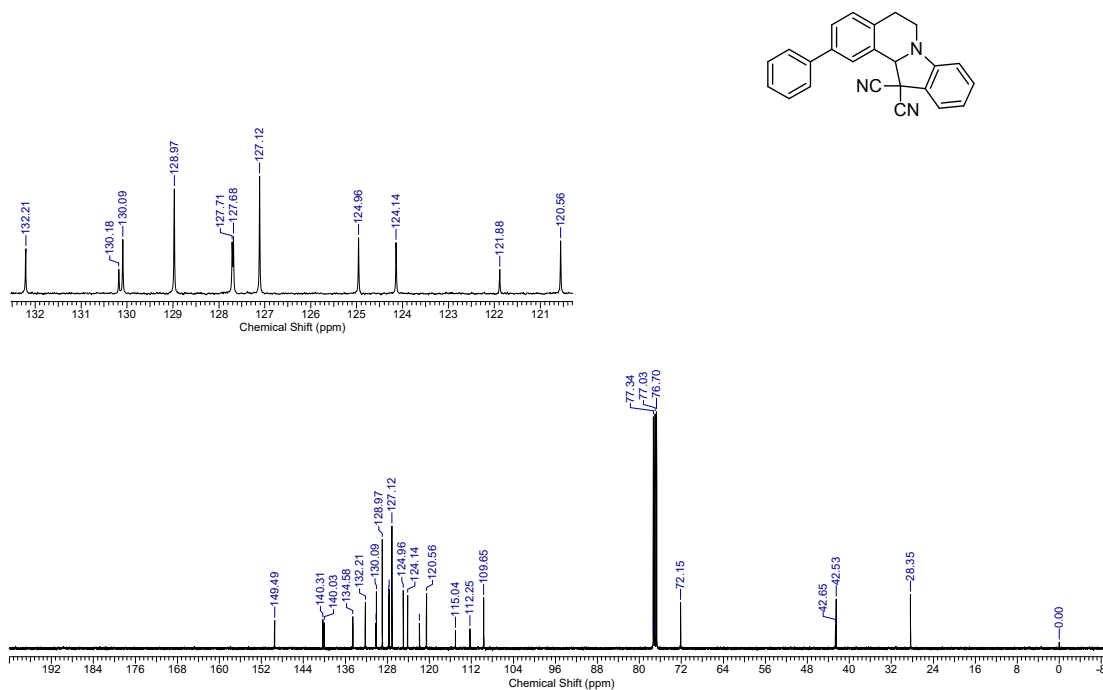

Figure S86. <sup>13</sup>C NMR spectrum of compound 4n

280-GM557-1.esp  
280-GM557-1.esp

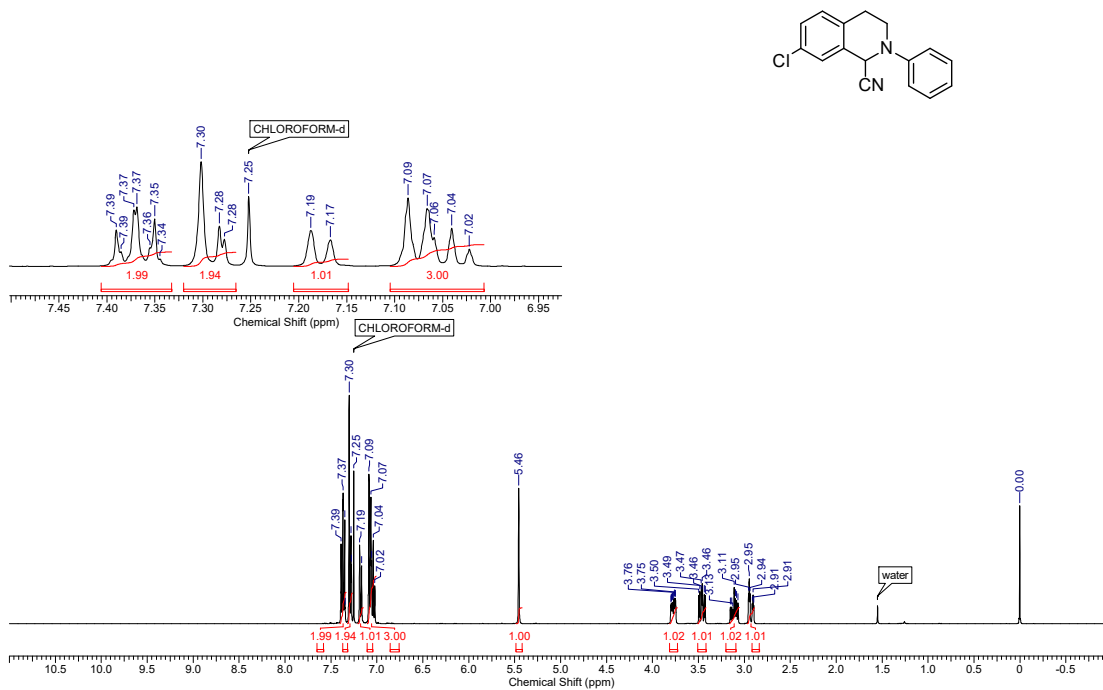

Figure S87. <sup>1</sup>H NMR spectrum of compound 3o

7381-GM-532-2-13C.esp  
7381-GM-532-2-13C.esp

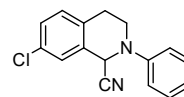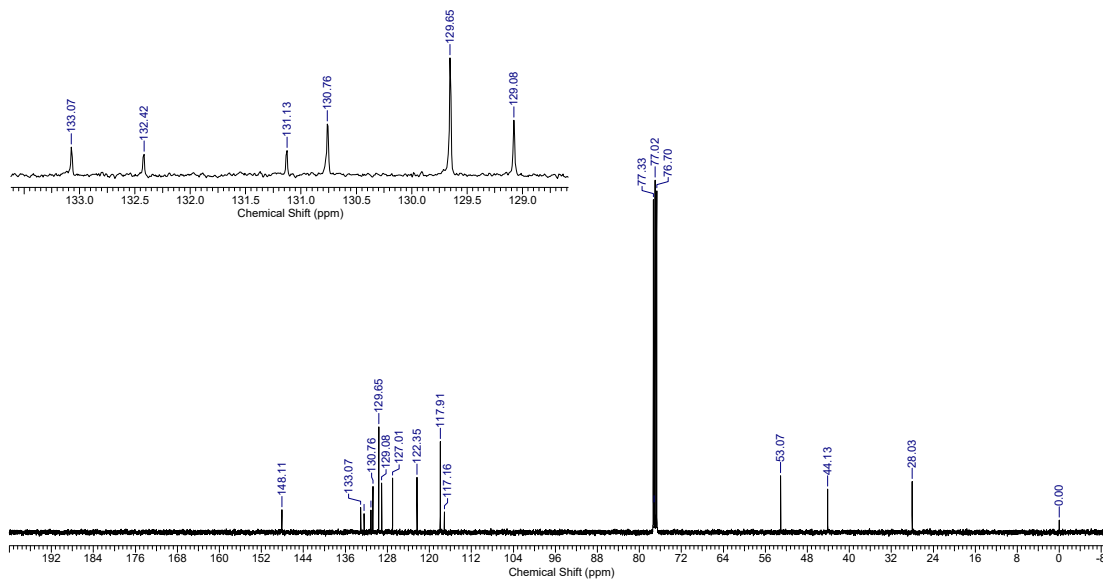

Figure S88. <sup>13</sup>C NMR spectrum of compound 30

8010-GM-532-3.esp  
8010-GM-532-3.esp

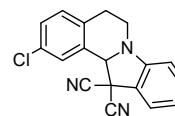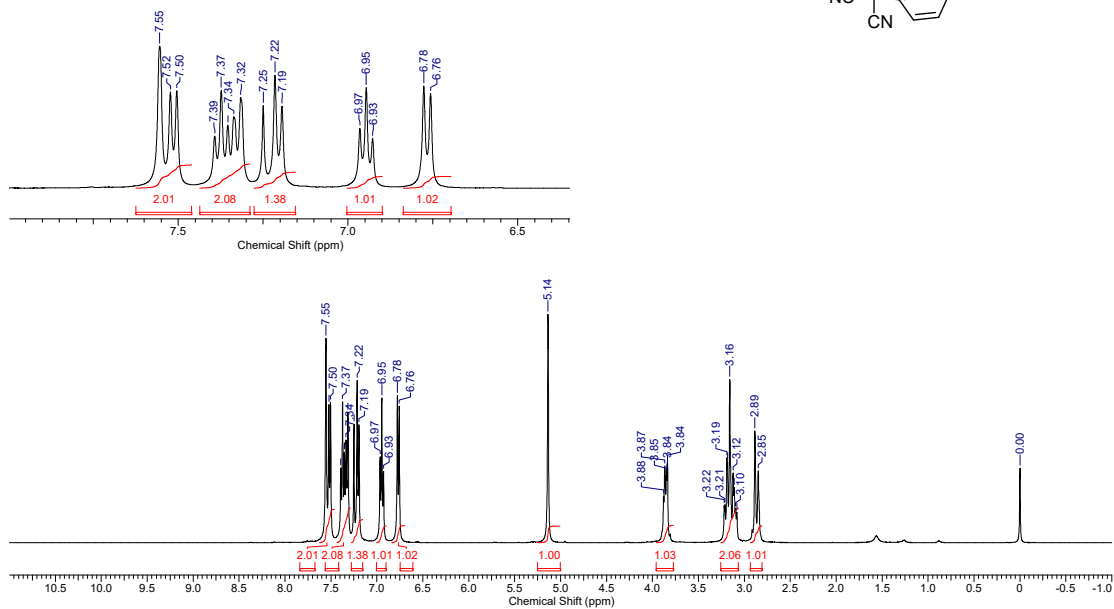

Figure S89. <sup>1</sup>H NMR spectrum of compound 40

7391-GM-532-3-13C.esp  
7391-GM-532-3-13C.esp

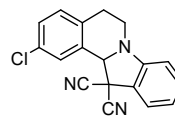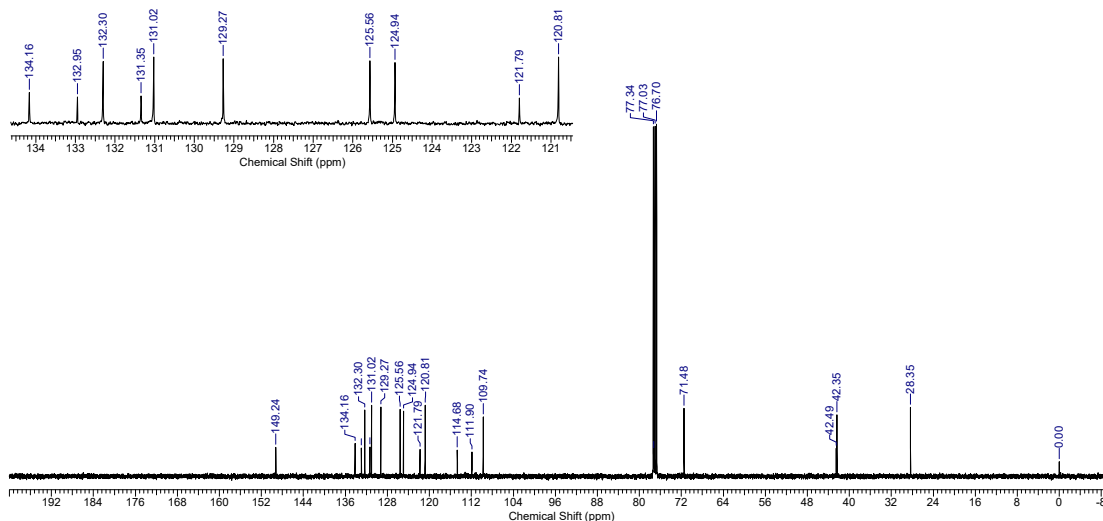

Figure S90. <sup>13</sup>C NMR spectrum of compound 4o

9870-GM539-3.esp  
9870-GM539-3.esp

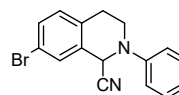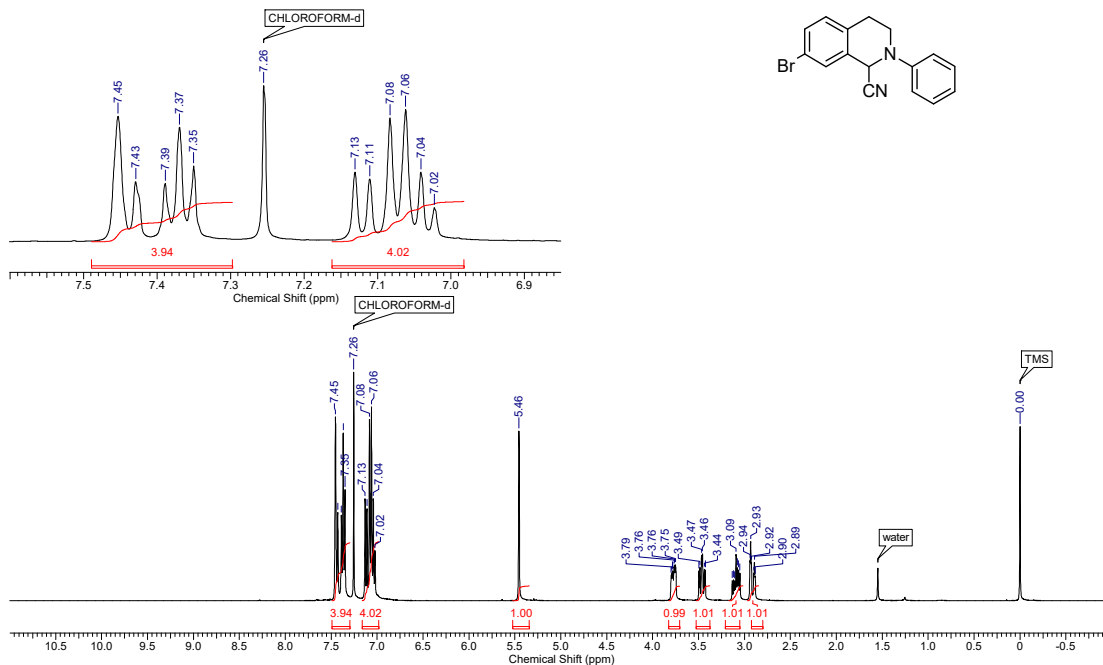

Figure S91. <sup>1</sup>H NMR spectrum of compound 3p

9391-GM522-A-13C.esp  
9391-GM522-A-13C.esp

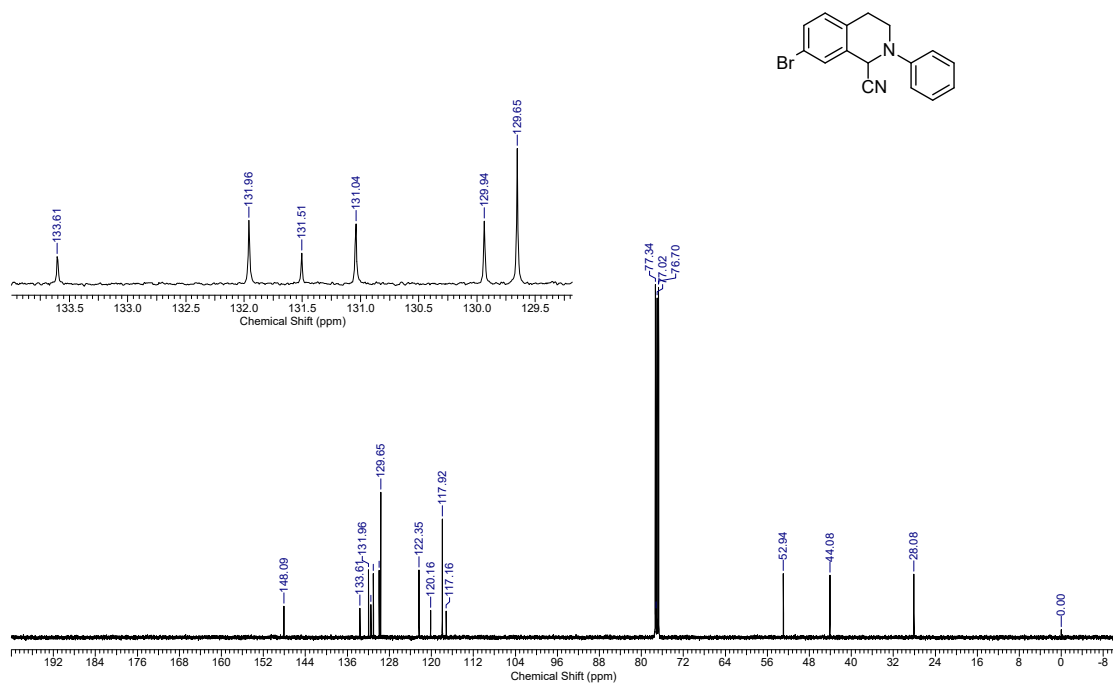

Figure S92. <sup>13</sup>C NMR spectrum of compound 3p

9110-GM-522-2.esp  
9110-GM-522-2.esp

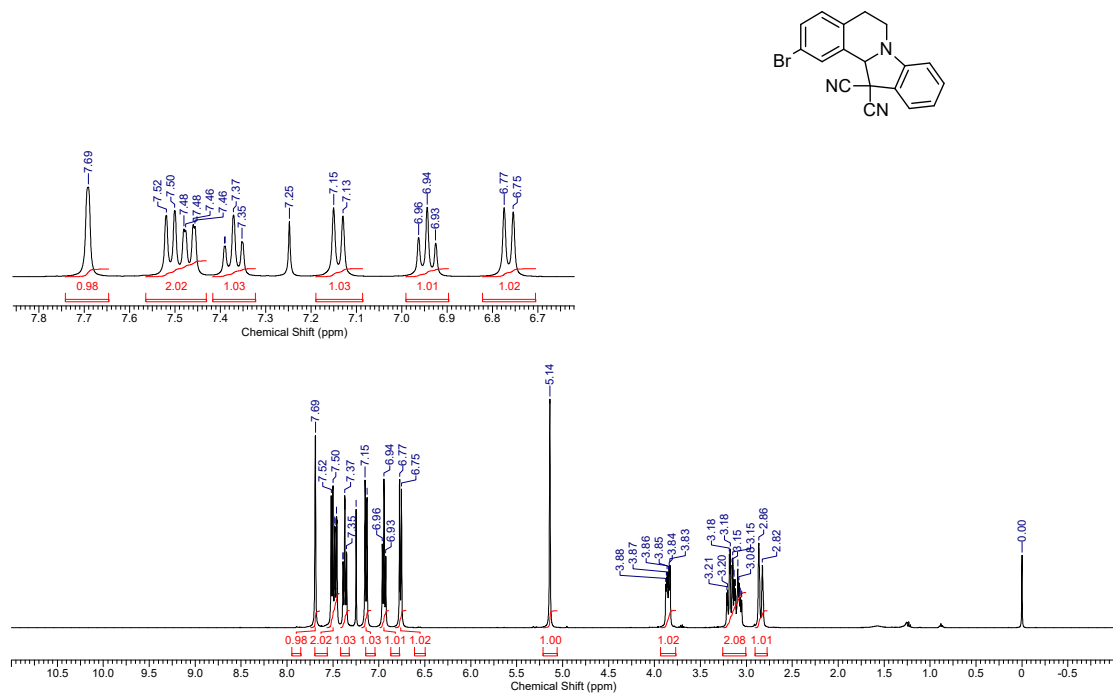

Figure S93. <sup>1</sup>H NMR spectrum of compound 4p

9111-GM522-2-13C.esp  
9111-GM522-2-13C.esp

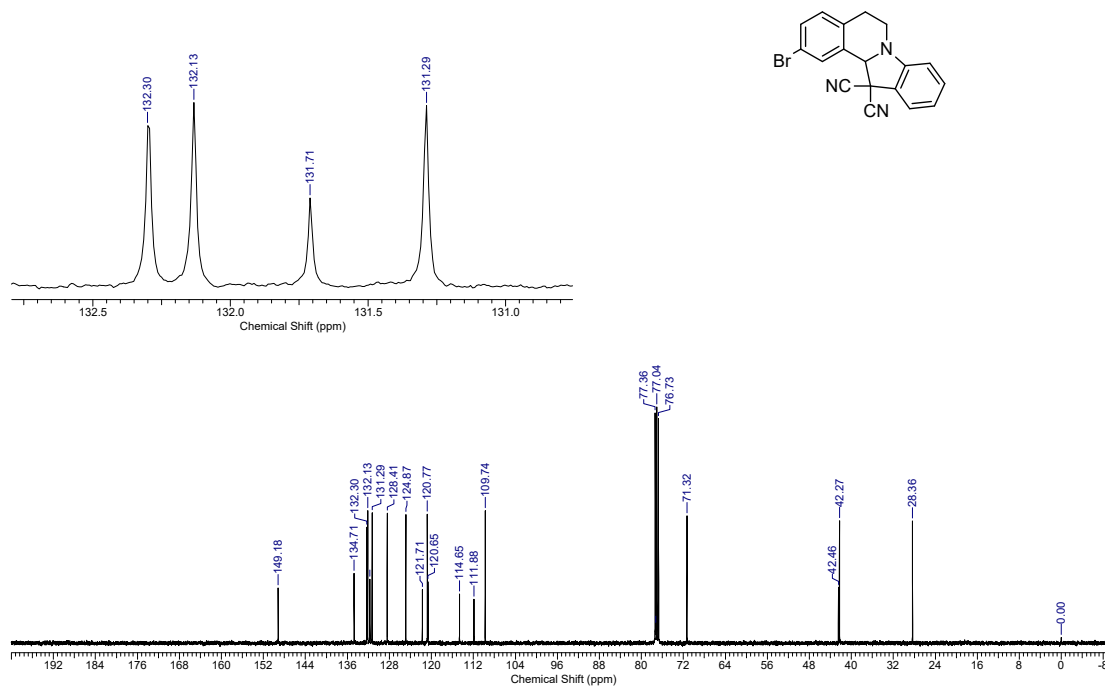

Figure S94. <sup>13</sup>C NMR spectrum of compound 4p

9890-GM547-1.esp  
9890-GM547-1.esp

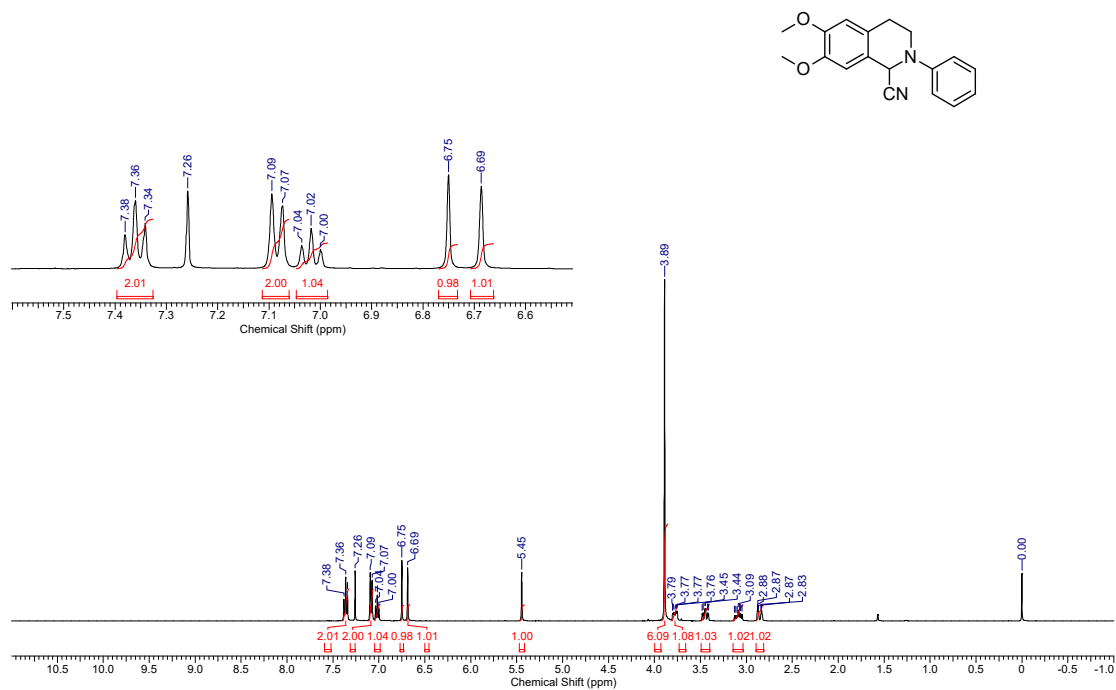

Figure S95. <sup>1</sup>H NMR spectrum of compound 3q

9891-GM547-1-13C.esp  
9891-GM547-1-13C.esp

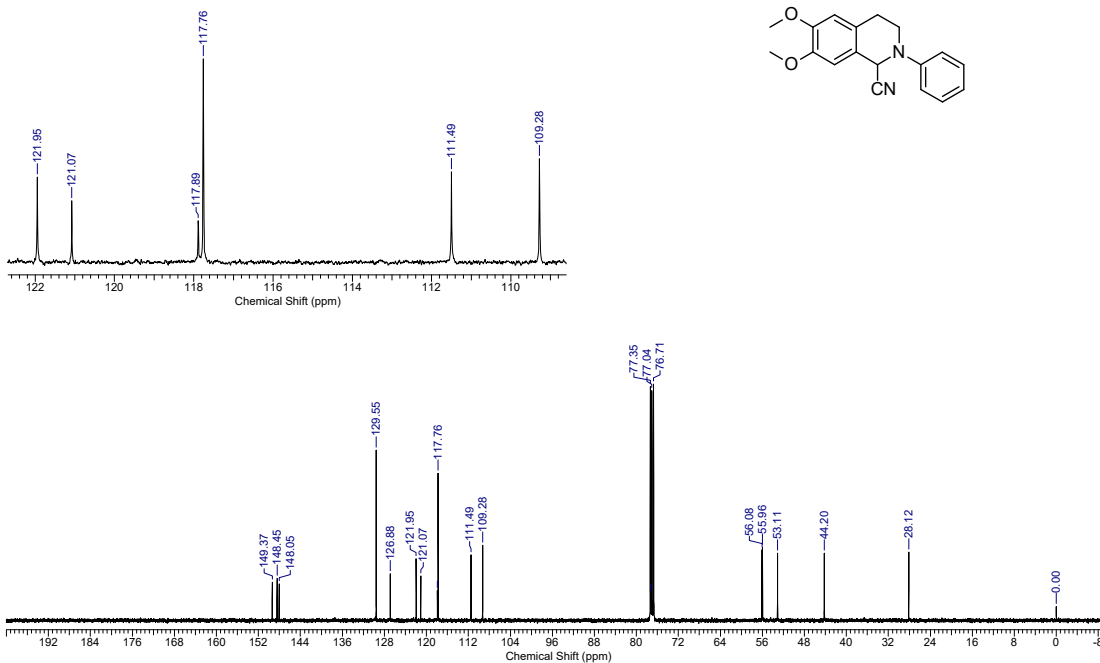

Figure S96. <sup>13</sup>C NMR spectrum of compound 3q

9860-GM514-3.esp  
9860-GM514-3.esp

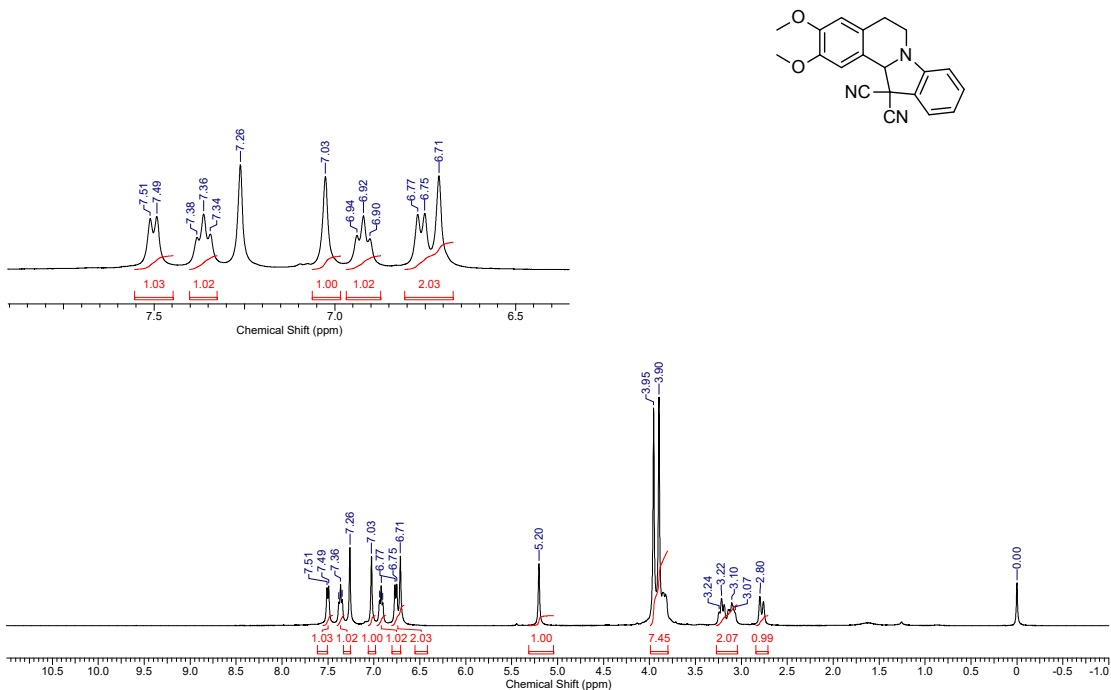

Figure S97. <sup>1</sup>H NMR spectrum of compound 4q

9861-GM514-3-13C.esp  
9861-GM514-3-13C.esp

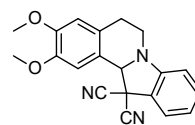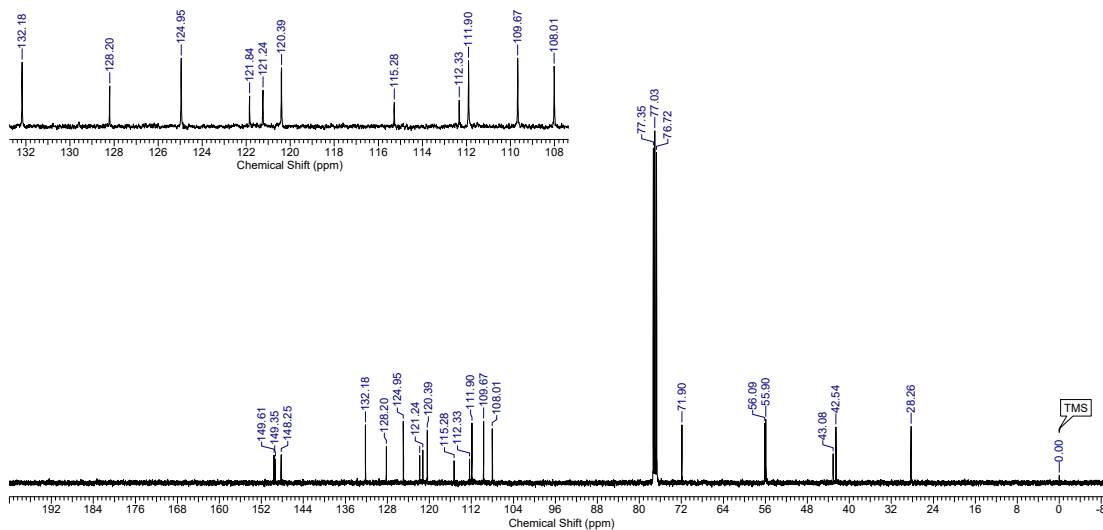

Figure S98. <sup>13</sup>C NMR spectrum of compound 4q

40-GM554-1.esp  
40-GM554-1.esp

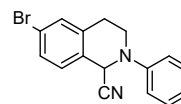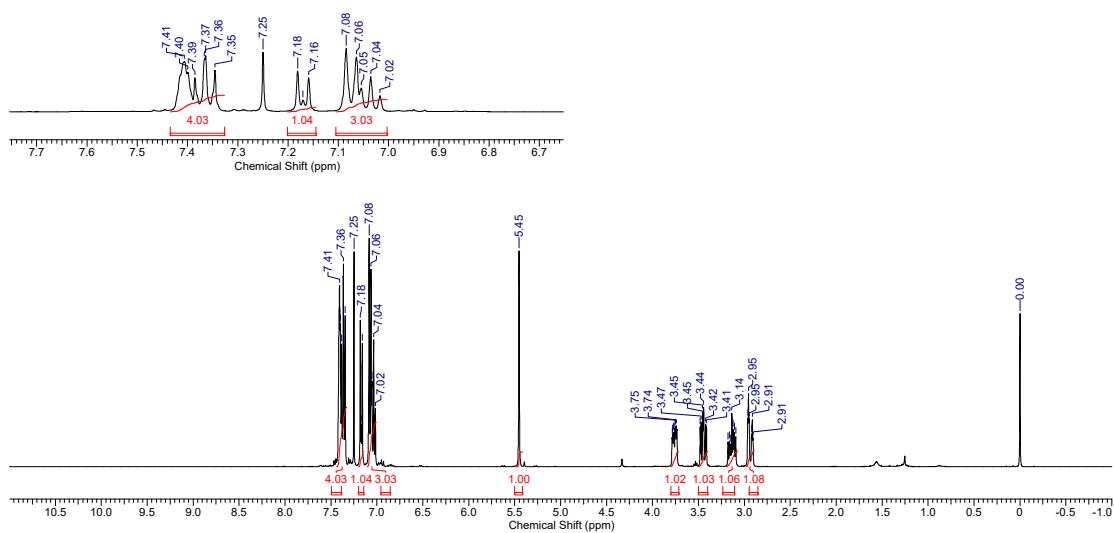

Figure S99. <sup>1</sup>H NMR spectrum of compound 3r



9581-GM545-1-13C.esp  
9581-GM545-1-13C.esp

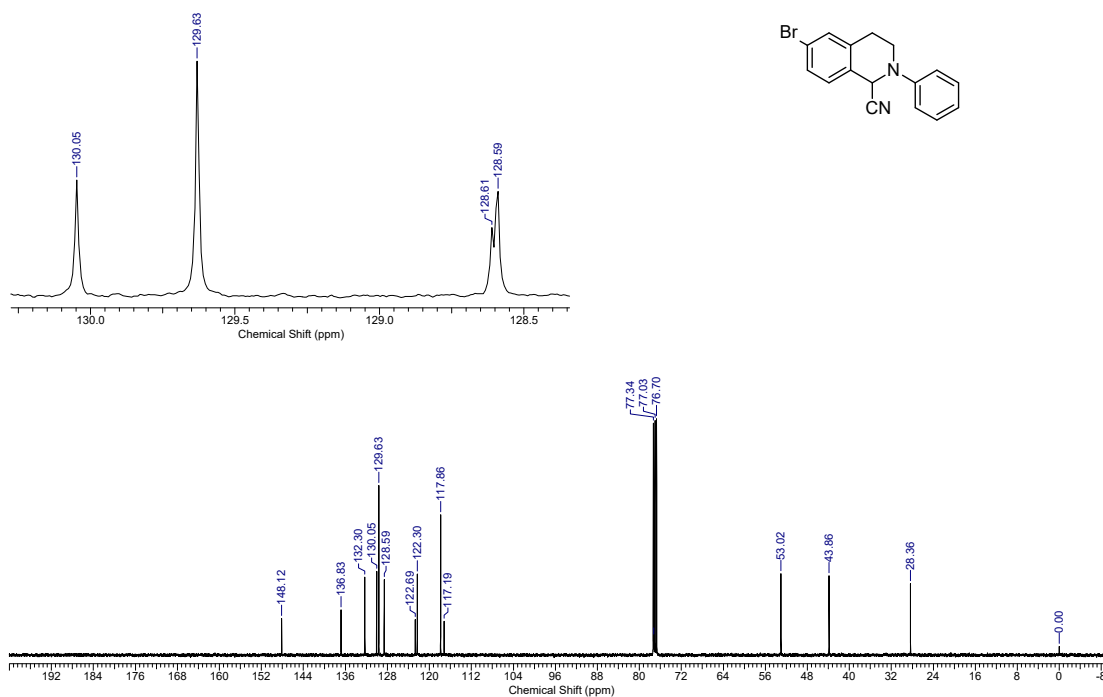

Figure S100. <sup>13</sup>C NMR spectrum of compound 3r

9120-GM-523-4.esp  
9120-GM-523-4.esp

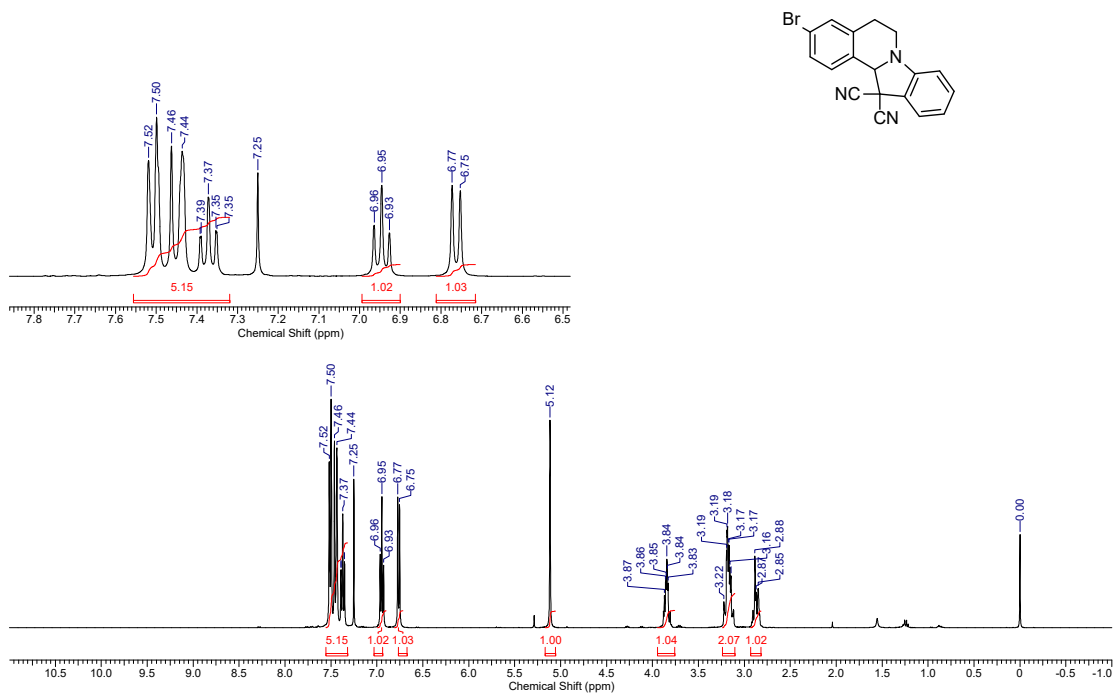

Figure S101. <sup>1</sup>H NMR spectrum of compound 4r

9121-GM523-4-13C.esp  
9121-GM523-4-13C.esp

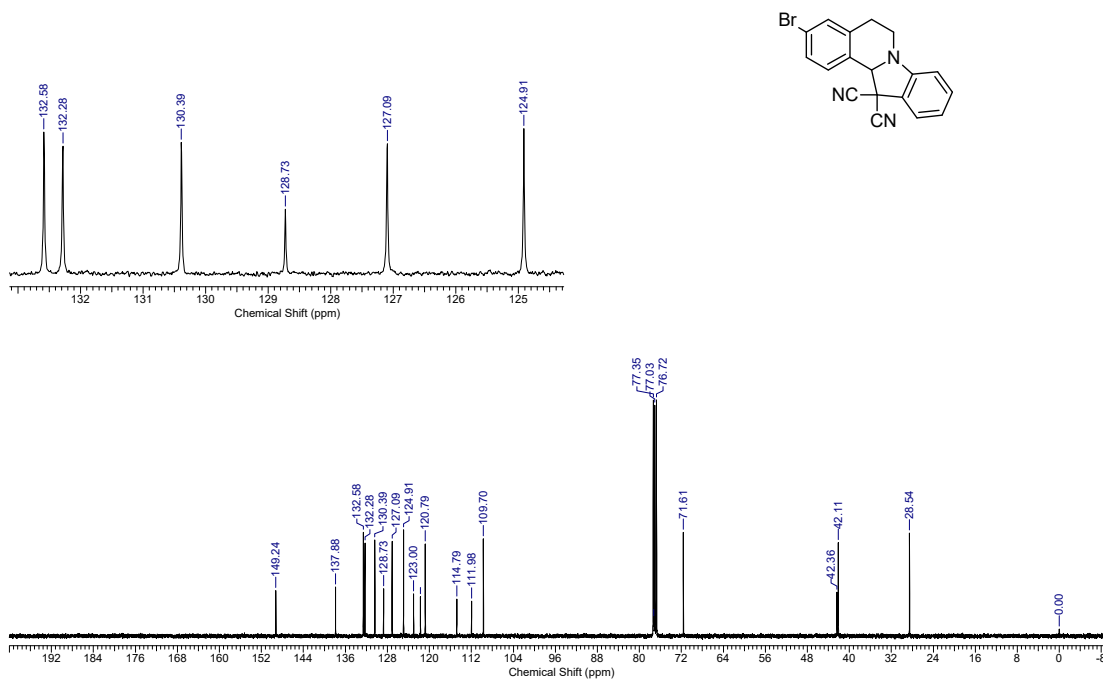

Figure S102. <sup>13</sup>C NMR spectrum of compound 4r

8710-GM533b-2.esp  
8710-GM533b-2.esp

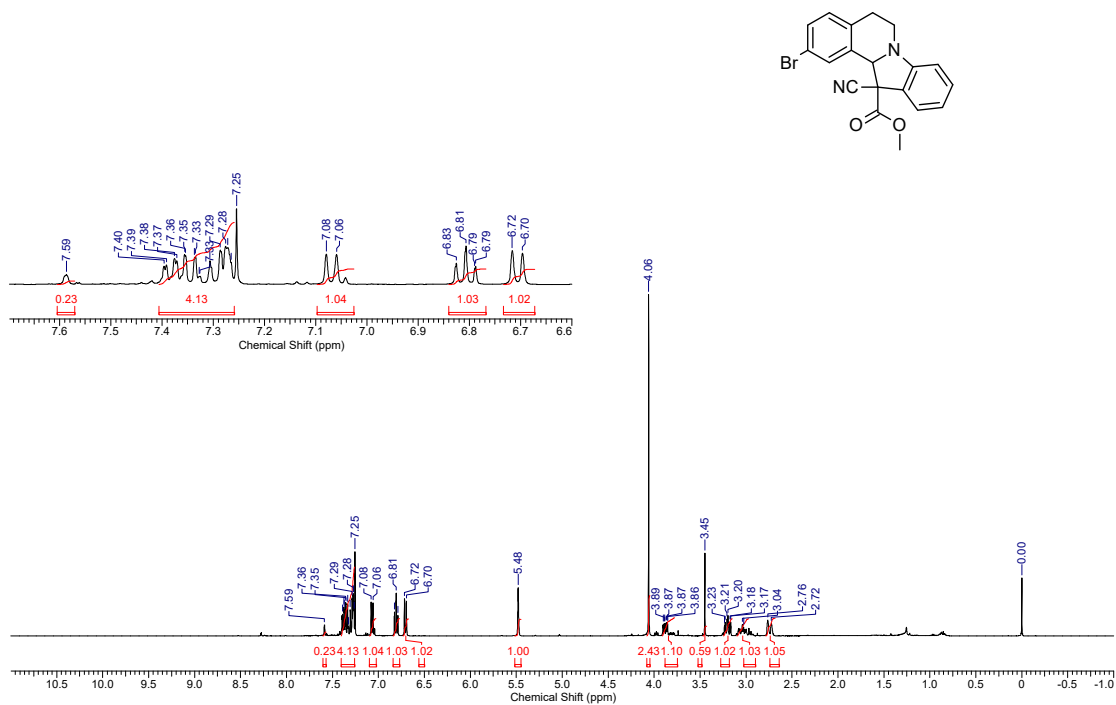

Figure S103. <sup>1</sup>H NMR spectrum of compound 4s

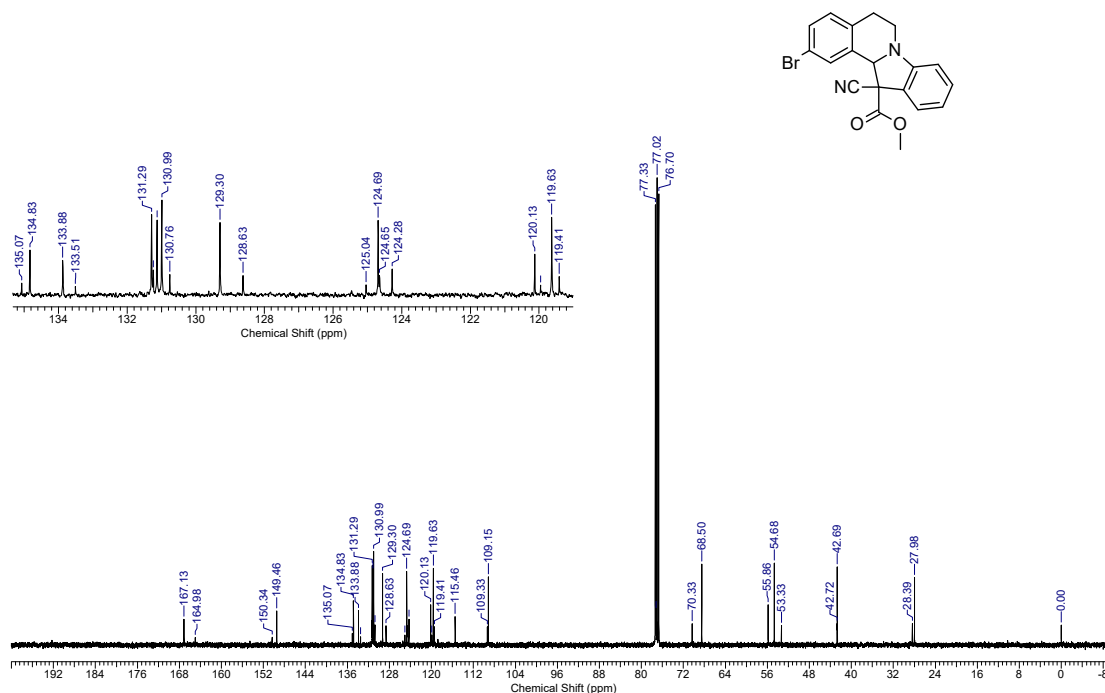

Figure S104. <sup>13</sup>C NMR spectrum of compound 4s

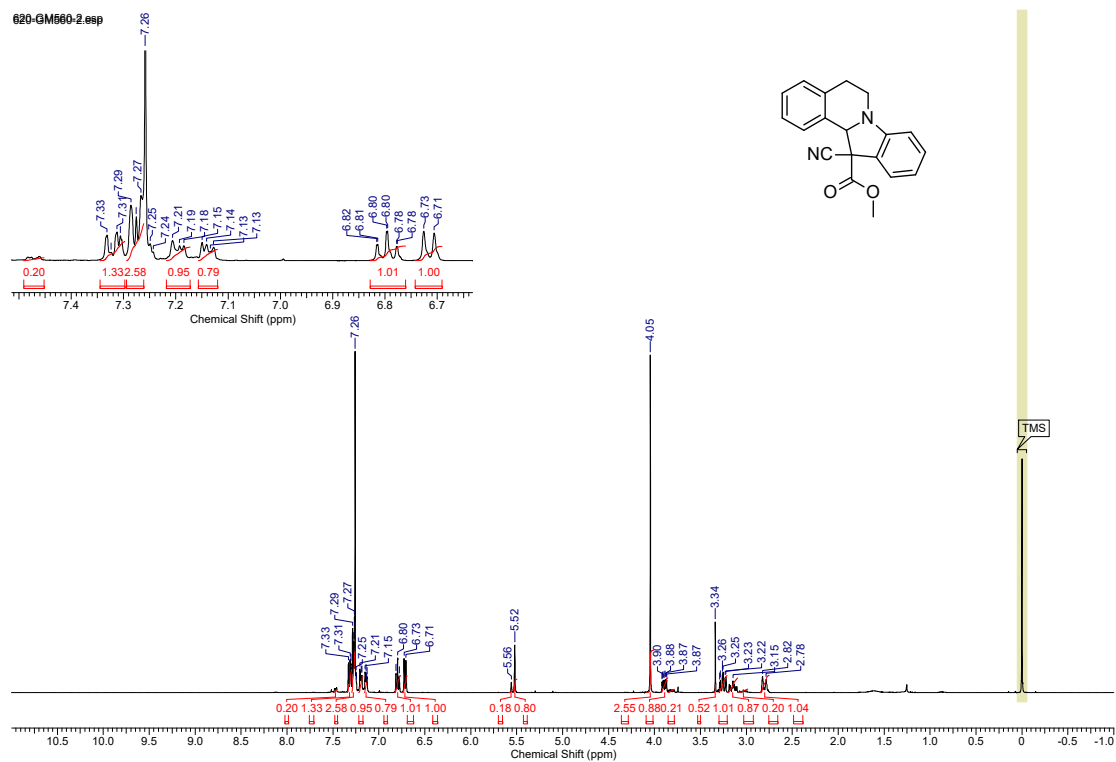

Figure S105. <sup>1</sup>H NMR spectrum of compound 4t

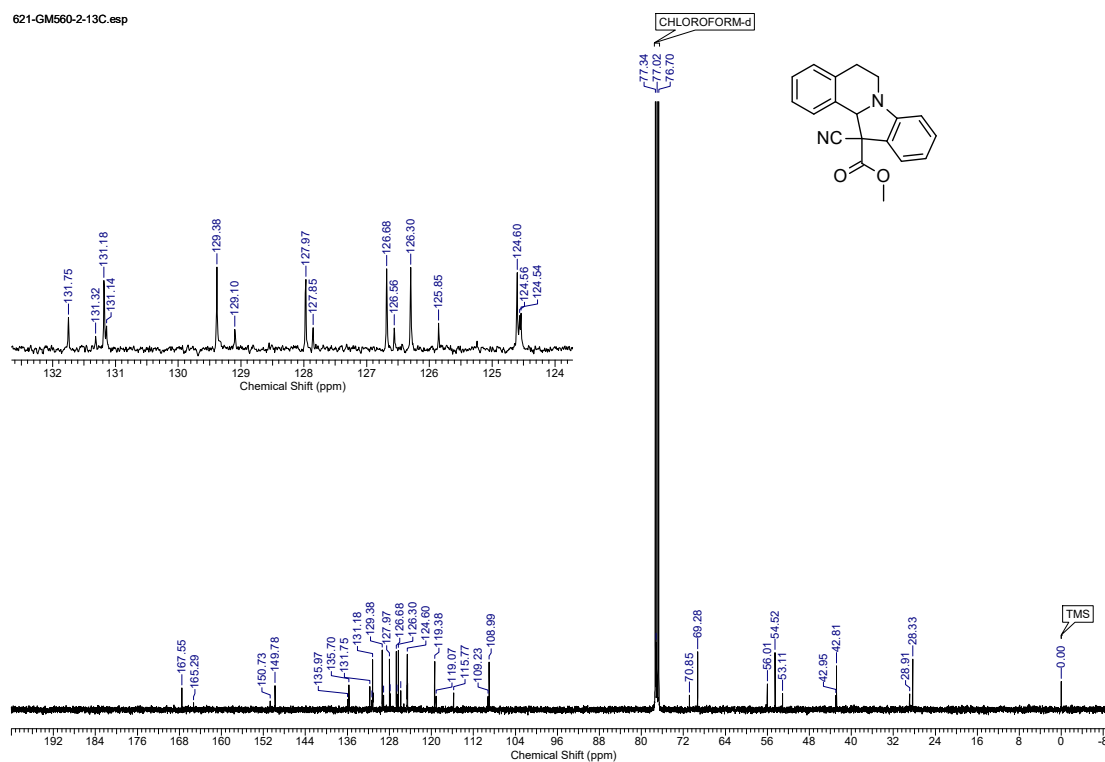

**Figure S106.  $^{13}\text{C}$  NMR spectrum of compound 4t**

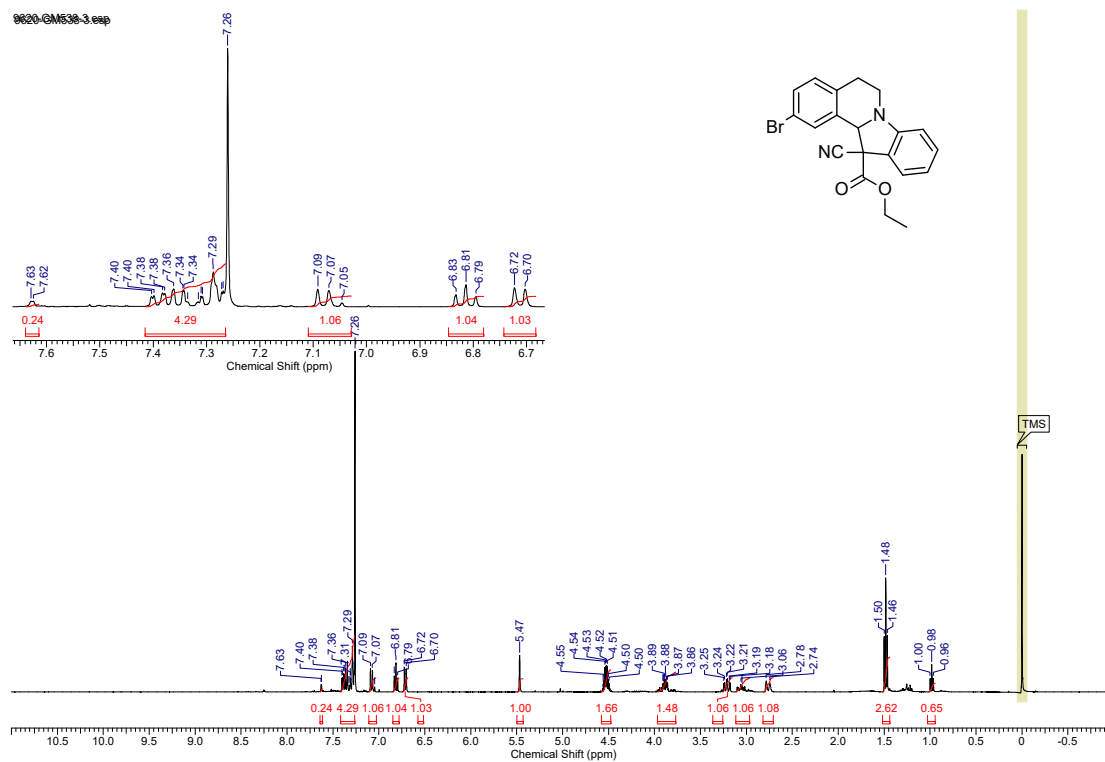

**Figure S107.  $^1\text{H}$  NMR spectrum of compound 4u**



761-GM539b-13C.esp  
761-GM539b-13C.esp

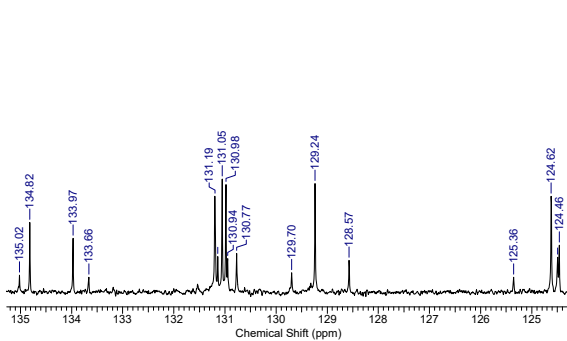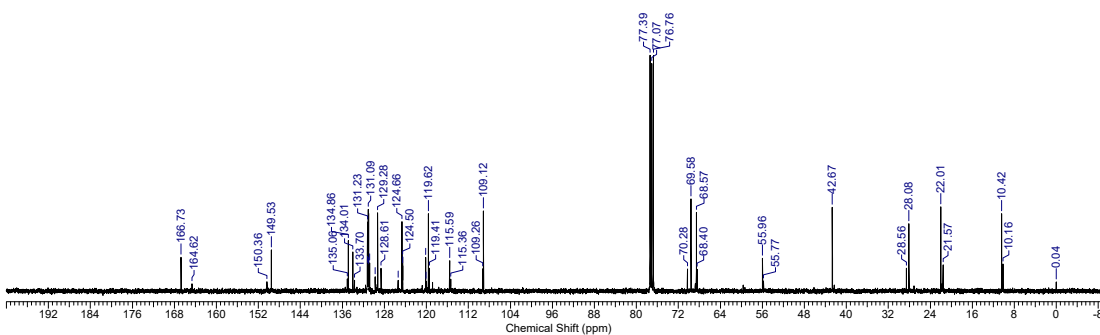

Figure S110.  $^{13}\text{C}$  NMR spectrum of compound 4v

8420-GM-540-2.esp  
8420-GM-540-2.esp

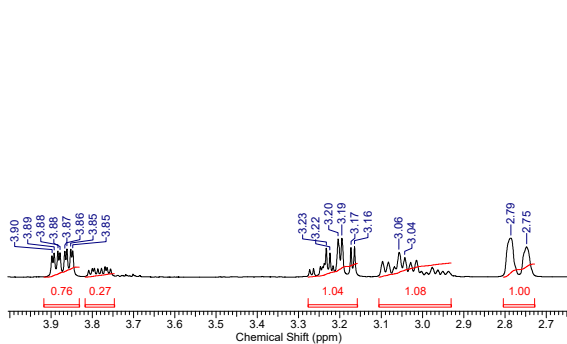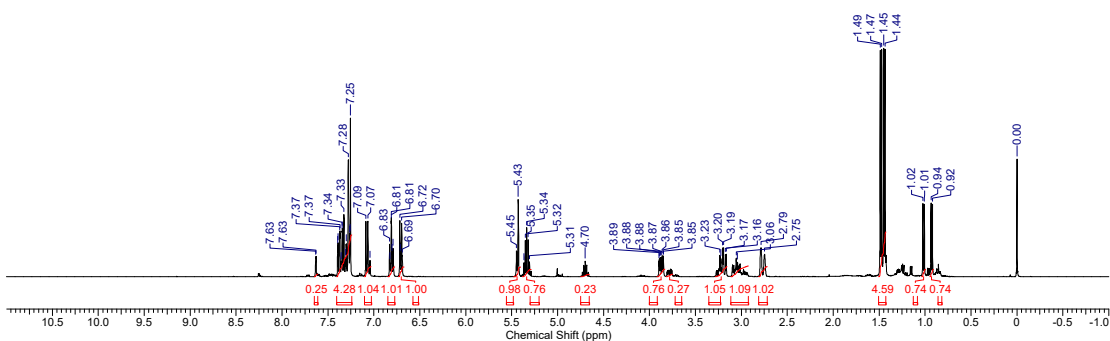

Figure S111.  $^1\text{H}$  NMR spectrum of compound 4w

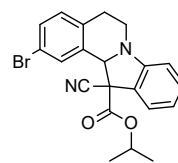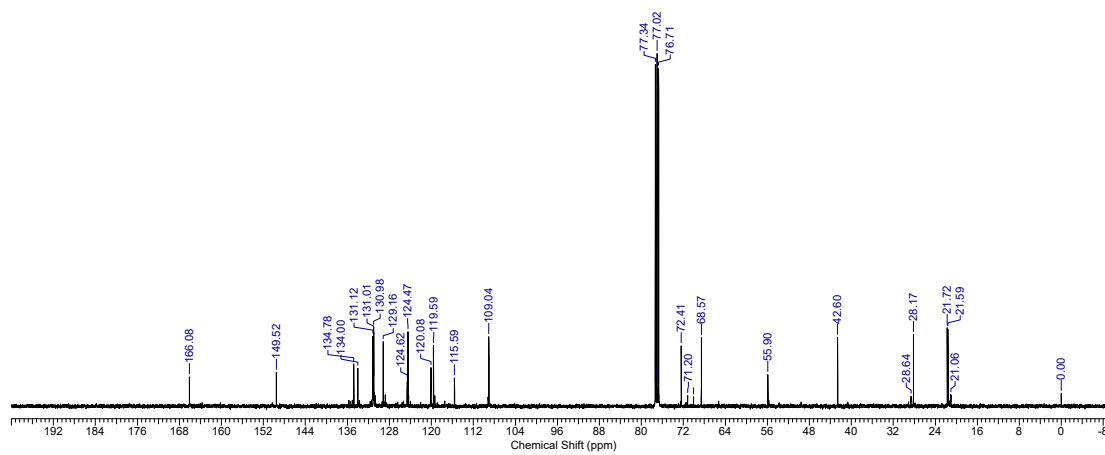

Figure S112. <sup>13</sup>C NMR spectrum of compound 4w

## 2. Crystallographic Analysis: Determination of Structure of 4a, 4j1 and 4s

### 1) Structure determination of 4a

The structure of **4a** was determined by the X-ray diffraction. Recrystallized from dichloromethane/EtOH. Further information can be found in the CIF file. This crystal was deposited in the Cambridge Crystallographic Data Centre and assigned as CCDC 2077460.

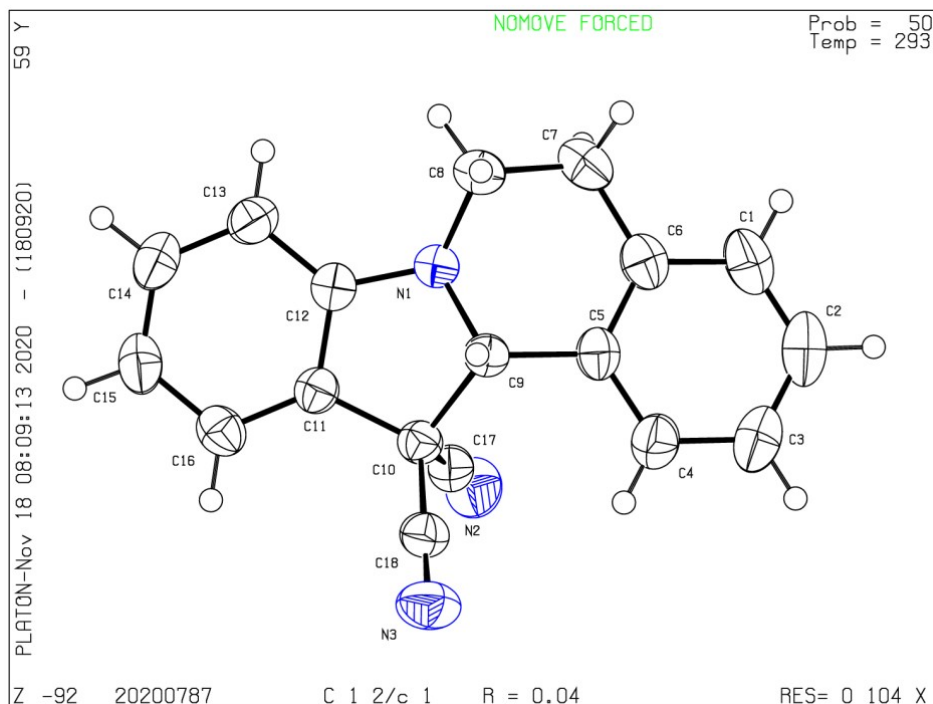

**Table S1. Crystal data and structure refinement for 4a.**

|                                    |                                                |
|------------------------------------|------------------------------------------------|
| Identification code                | 20200787                                       |
| Empirical formula                  | C <sub>18</sub> H <sub>13</sub> N <sub>3</sub> |
| Formula weight                     | 271.31                                         |
| Temperature/K                      | 293(2)                                         |
| Crystal system                     | monoclinic                                     |
| Space group                        | C2/c                                           |
| a/Å                                | 10.9525(3)                                     |
| b/Å                                | 12.9657(4)                                     |
| c/Å                                | 20.7069(7)                                     |
| α/°                                | 90                                             |
| β/°                                | 103.542(3)                                     |
| γ/°                                | 90                                             |
| Volume/Å <sup>3</sup>              | 2858.76(16)                                    |
| Z                                  | 8                                              |
| ρ <sub>calc</sub> /cm <sup>3</sup> | 1.261                                          |
| μ/mm <sup>-1</sup>                 | 0.600                                          |



|                                             |                                          |
|---------------------------------------------|------------------------------------------|
| F(000)                                      | 1136.0                                   |
| Crystal size/mm <sup>3</sup>                | 0.18 × 0.15 × 0.1                        |
| Radiation                                   | CuK $\alpha$ ( $\lambda$ = 1.54184)      |
| 2 $\theta$ range for data collection/°      | 8.786 to 134.144                         |
| Index ranges                                | -12 ≤ h ≤ 13, -15 ≤ k ≤ 12, -24 ≤ l ≤ 18 |
| Reflections collected                       | 5277                                     |
| Independent reflections                     | 2555 [Rint = 0.0257, Rsigma = 0.0323]    |
| Data/restraints/parameters                  | 2555/0/190                               |
| Goodness-of-fit on F <sup>2</sup>           | 1.043                                    |
| Final R indexes [ $I \geq 2\sigma(I)$ ]     | R1 = 0.0439, wR2 = 0.1125                |
| Final R indexes [all data]                  | R1 = 0.0544, wR2 = 0.1230                |
| Largest diff. peak/hole / e Å <sup>-3</sup> | 0.13/-0.18                               |

## 2) Structure determination of **4j1**

The structure of **4j1** was determined by the X-ray diffraction. Recrystallized from dichloromethane/EtOH. Further information can be found in the CIF file. This crystal was deposited in the Cambridge Crystallographic Data Centre and assigned as CCDC 2077464.

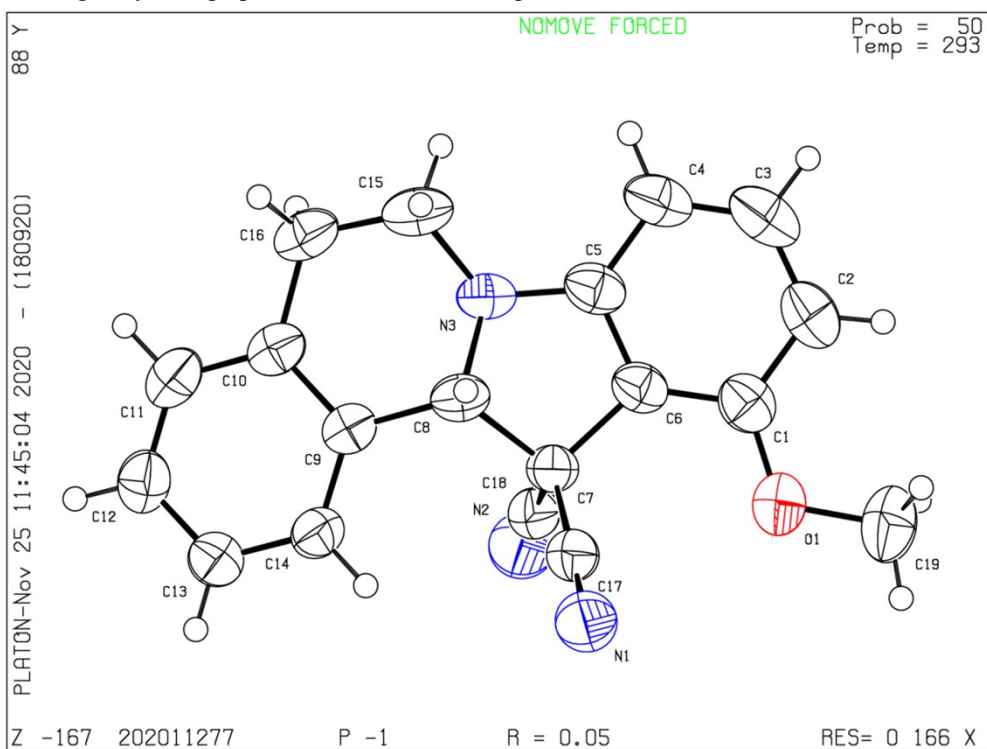

**Table S2. Crystal data and structure refinement for **4j1**.**

|                     |                                                  |
|---------------------|--------------------------------------------------|
| Identification code | 202011277                                        |
| Empirical formula   | C <sub>19</sub> H <sub>15</sub> N <sub>3</sub> O |
| Formula weight      | 301.34                                           |
| Temperature/K       | 293(2)                                           |
| Crystal system      | triclinic                                        |
| Space group         | P-1                                              |

|                                             |                                       |
|---------------------------------------------|---------------------------------------|
| a/Å                                         | 7.5372(7)                             |
| b/Å                                         | 7.8330(5)                             |
| c/Å                                         | 13.1572(11)                           |
| $\alpha$ /°                                 | 81.704(6)                             |
| $\beta$ /°                                  | 86.697(7)                             |
| $\gamma$ /°                                 | 83.076(6)                             |
| Volume/Å <sup>3</sup>                       | 762.42(11)                            |
| Z                                           | 2                                     |
| $\rho$ calc/g/cm <sup>3</sup>               | 1.313                                 |
| $\mu$ /mm <sup>-1</sup>                     | 0.667                                 |
| F(000)                                      | 316.0                                 |
| Crystal size/mm <sup>3</sup>                | 0.19 × 0.15 × 0.11                    |
| Radiation                                   | CuK $\alpha$ ( $\lambda$ = 1.54184)   |
| 2 $\Theta$ range for data collection/°      | 6.794 to 134.092                      |
| Index ranges                                | -8 ≤ h ≤ 9, -6 ≤ k ≤ 9, -15 ≤ l ≤ 15  |
| Reflections collected                       | 5367                                  |
| Independent reflections                     | 2719 [Rint = 0.0216, Rsigma = 0.0347] |
| Data/restraints/parameters                  | 2719/0/209                            |
| Goodness-of-fit on F <sup>2</sup>           | 1.061                                 |
| Final R indexes [ $I \geq 2\sigma(I)$ ]     | R1 = 0.0466, wR2 = 0.1078             |
| Final R indexes [all data]                  | R1 = 0.0660, wR2 = 0.1220             |
| Largest diff. peak/hole / e Å <sup>-3</sup> | 0.13/-0.24                            |

---

### 3) Structure determination of **4s**

The structure of **4s** was determined by the X-ray diffraction. Recrystallized from dichloromethane/EtOH. Further information can be found in the CIF file. This crystal was deposited in the Cambridge Crystallographic Data Centre and assigned as CCDC 2077465.

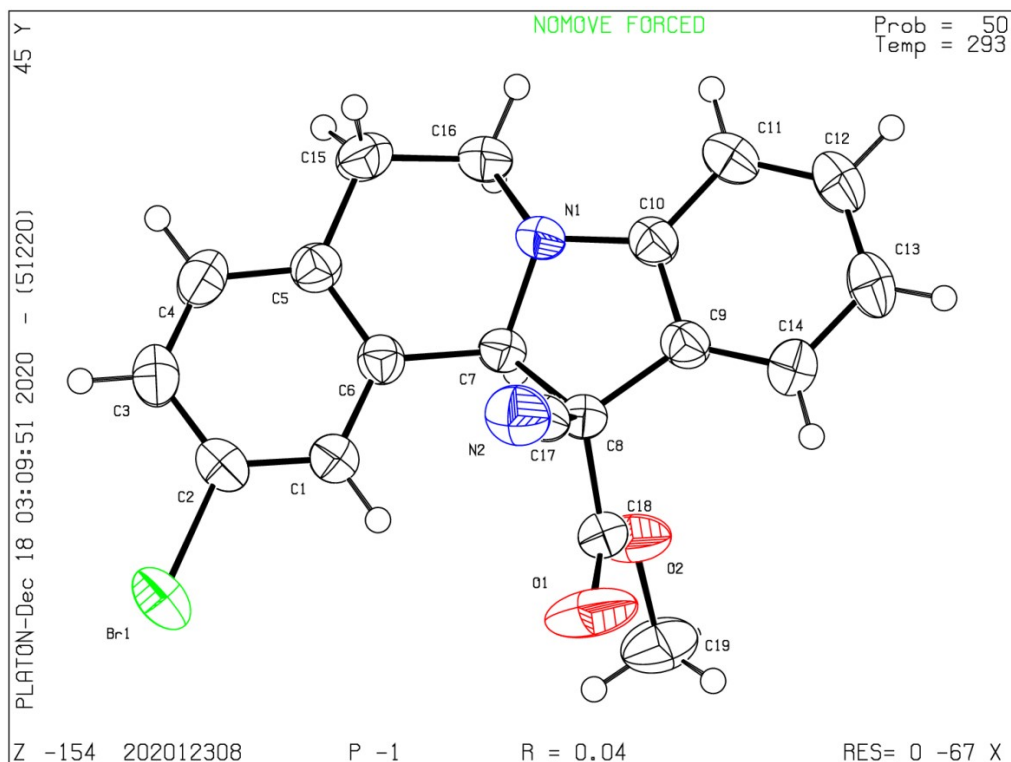

**Table S3. Crystal data and structure refinement for 4s.**

|                                        |                                                                 |
|----------------------------------------|-----------------------------------------------------------------|
| Identification code                    | 202012308                                                       |
| Empirical formula                      | C <sub>19</sub> H <sub>15</sub> BrN <sub>2</sub> O <sub>2</sub> |
| Formula weight                         | 383.24                                                          |
| Temperature/K                          | 293(2)                                                          |
| Crystal system                         | triclinic                                                       |
| Space group                            | P-1                                                             |
| a/Å                                    | 8.5331(6)                                                       |
| b/Å                                    | 9.1322(6)                                                       |
| c/Å                                    | 11.9513(10)                                                     |
| $\alpha$ /°                            | 77.749(6)                                                       |
| $\beta$ /°                             | 79.907(7)                                                       |
| $\gamma$ /°                            | 65.413(7)                                                       |
| Volume/Å <sup>3</sup>                  | 823.62(11)                                                      |
| Z                                      | 2                                                               |
| $\rho$ calc/cm <sup>3</sup>            | 1.545                                                           |
| $\mu$ /mm <sup>-1</sup>                | 3.514                                                           |
| F(000)                                 | 388.0                                                           |
| Crystal size/mm <sup>3</sup>           | 0.15 × 0.12 × 0.1                                               |
| Radiation                              | CuK $\alpha$ ( $\lambda$ = 1.54184)                             |
| 2 $\theta$ range for data collection/° | 7.606 to 134.16                                                 |
| Index ranges                           | -10 ≤ h ≤ 10, -10 ≤ k ≤ 10, -13 ≤ l ≤ 14                        |

|                                             |                                       |
|---------------------------------------------|---------------------------------------|
| Reflections collected                       | 11170                                 |
| Independent reflections                     | 2930 [Rint = 0.0433, Rsigma = 0.0360] |
| Data/restraints/parameters                  | 2930/0/218                            |
| Goodness-of-fit on F2                       | 1.041                                 |
| Final R indexes [ $I \geq 2\sigma(I)$ ]     | R1 = 0.0372, wR2 = 0.0835             |
| Final R indexes [all data]                  | R1 = 0.0491, wR2 = 0.0907             |
| Largest diff. peak/hole / e Å <sup>-3</sup> | 0.66/-0.51                            |

---

## Supplementary References

1. F. Y. Kwong, A. Klapars and S. L. Buchwald, *Org. Lett.*, 2002, **4**, 581.
2. J.-H. Wang, X.-B. Li, J. Li, T. Lei, H.-L. Wu, X.-L. Nan, C.-H. Tung and L.-Z. Wu, *Chem. Commun.*, 2019, **55**, 10376.
3. Gaussian 16, Revision C.01, M. J. Frisch, G. W. Trucks, H. B. Schlegel, G. E. Scuseria, M. A. Robb, J. R. Cheeseman, G. Scalmani, V. Barone, G. A. Petersson, H. Nakatsuji, X. Li, M. Caricato, A. V. Marenich, J. Bloino, B. G. Janesko, R. Gomperts, B. Mennucci, H. P. Hratchian, J. V. Ortiz, A. F. Izmaylov, J. L. Sonnenberg, D. Williams-Young, F. Ding, F. Lipparini, F. Egidi, J. Goings, B. Peng, A. Petrone, T. Henderson, D. Ranasinghe, V. G. Zakrzewski, J. Gao, N. Rega, G. Zheng, W. Liang, M. Hada, M. Ehara, K. Toyota, R. Fukuda, J. Hasegawa, M. Ishida, T. Nakajima, Y. Honda, O. Kitao, H. Nakai, T. Vreven, K. Throssell, J. A. Montgomery, Jr., J. E. Peralta, F. Ogliaro, M. J. Bearpark, J. J. Heyd, E. N. Brothers, K. N. Kudin, V. N. Staroverov, T. A. Keith, R. Kobayashi, J. Normand, K. Raghavachari, A. P. Rendell, J. C. Burant, S. S. Iyengar, J. Tomasi, M. Cossi, J. M. Millam, M. Klene, C. Adamo, R. Cammi, J. W. Ochterski, R. L. Martin, K. Morokuma, O. Farkas, J. B. Foresman and D. J. Fox, Gaussian, Inc., Wallingford CT, 2019.
4. T. Yanai, D. P. Tew and N. C. Handy, *Chem Phys Lett.*, 2004, **393**, 51
5. F. Weigend and R. Ahlrichs, *Phys. Chem. Chem. Phys.*, 2005, **7**, 3297.
6. M. Cossi, V. Barone, R. Cammi and J. Tomasi, *Chem. Phys. Lett.*, 1996, **255**, 327.
7. T. Lu and F. Chen, *J. Comput. Chem.*, 2012, **33**, 580;
8. E. R. Johnson, S. Keinan, P. Mori-Sánchez, J. Contreras-Garcia, A. J. Cohen and W. Yang, *J. Am. Chem. Soc.*, 2010, **132**, 6498.
9. W. Humphrey, A. Dalke and K. Schulten, *J. Molec. Graphics*, 1996, **14**, 33.
10. T. Lu and F. Chen, *J. Theor. Comput. Chem.*, 2012, **11**, 163.
11. M. R. Patil, N. P. Dedhia, A. R. Kapdi and A. V. Kumar, *J. Org. Chem.*, 2018, **83**, 4477.
12. G. Zhang, Y. Ma, G. Cheng, D. Liu and R. Wang, *Org. Lett.*, 2014, **16**, 656.
13. B. Yi, N. Yan, N. Yi, Y. Xie, X. Wen, C.-T. Au and D. Lan, *RSC Adv.*, 2019, **9**, 29721.
14. R. Yang, Q. Ruan, B.-Y. Zhang, Z.-L. Zheng, F. Miao, L. Zhou and H.-L. Geng, *Molecules*, 2014, **19**, 8051.
15. T. Ide, K. Shimizu, H. Egami and Y. Hamashima, *Tetrahedron Lett.*, 2018, **59**, 3258.
